# Supplementary material
Source: PubMed Central journal article supplement (PMC6026248)
Supplement: mmc1.pdf [file mmc1.pdf]

# DNA Methylation Profiling of Blood Monocytes in Patients With Obesity Hypoventilation Syndrome

## Effect of Positive Airway Pressure Treatment

*Rene Cortese, PhD; Chunling Zhang, MSc; Riyue Bao, PhD; Jorge Andrade, PhD;  
Abdelnaby Khalyfa, PhD; Babak Mokhlesi, MD; and David Gozal, MD, FCCP*

CHEST 2016; 150(1):91-101

*Online supplements are not copyedited prior to posting and the author(s) take full responsibility for the accuracy of all data.*

© 2016 AMERICAN COLLEGE OF CHEST PHYSICIANS. Reproduction of this article is prohibited without written permission from the American College of Chest Physicians. See online for more details. DOI: 10.1016/j.chest.2016.02.648

## **e-Appendix 1:** Detailed materials and methods used in this study

**Patient population and sample preparation.** Our inclusion criteria were age  $\geq 18$  and  $\leq 75$  years of age, diagnosis of OHS in the past 3 months but no initiation of PAP therapy, body mass index (BMI)  $\geq 30$  kg/m<sup>2</sup>, daytime partial pressure of arterial CO<sub>2</sub> (PaCO<sub>2</sub>)  $\geq 45$  mmHg and daytime pH  $>7.35$  from an arterial blood gas, presence of OSA with an apnea-hypopnea index (AHI)  $\geq 5$  events/h of sleep, and forced expiratory volume in 1 second (FEV<sub>1</sub>)/forced vital capacity (FVC)  $> 70\%$ . We excluded acutely ill and unstable patients, hospitalization for respiratory exacerbation  $< 6$  weeks prior to screening visit, and evidence of alkalosis (pH  $> 7.45$ ) on the arterial blood gas measurement. Between March 2012 and February 2014, 39 patients evaluated in the Sleep Disorders Clinic were referred to the University of Chicago research site for suspicion of OHS. Written informed consent was provided by all patients. Due to lack of hypercapnia on the screening baseline arterial blood gas (PaCO<sub>2</sub>  $< 45$  mmHg) eighteen subjects were excluded. Of the remaining 21 participants, 6 did not agree to undergo two venipunctures. Therefore, the final analytic cohort consisted of 15 patients (6 male and 9 female) with OHS who underwent two venipunctures and two measurements of arterial blood gases 6 weeks apart after being prescribed PAP therapy.

All of these patients had OSA (14 patients with severe OSA as indicated by a apnea-hypopnea index (AHI) pre-treatment  $> 30$  events/hour total sleep time, and 1 patient with mild OSA: AHI pre-treatment = 8). All patients were clinically evaluated by sleep specialists in the Sleep Disorders Center of the University of Chicago. Each participant underwent three in-laboratory polysomnograms (PSG): baseline PSG, PAP titration PSG and PSG after 6 weeks of home PAP therapy. The final 6-week PSG was performed while the patient was wearing their home prescribed PAP device. Bedtimes were from 10:00 pm-12:00 am until 7:00 am-9:00 am. Each PSG included 8 hours of recording. PSG (Nihon Kohden, Foothill Ranch, CA) included recordings of six electroencephalographic channels, bilateral electro-oculograms, chin and tibialis electromyogram, electrocardiogram, airflow by nasal pressure transducer and oronasal thermocouples, chest and abdominal wall motion by respiratory inductance plethysmography belts, and oxygen saturation by finger pulse oximeter. Transcutaneous CO<sub>2</sub> monitoring was performed during baseline and 6-week PSG. All PSGs were staged and scored according to the 2007 American Academy of Sleep Medicine Manual for the Scoring of Sleep and Related Events<sup>1</sup>. Apneas were defined as a reduction of airflow of at least 90% on the oronasal thermistor for at least 10 seconds (obstructive if respiratory effort was present and central if respiratory effort was absent). Hypopneas were scored if the magnitude of the signal decreased by at least 30% of the baseline amplitude of the nasal pressure transducer for at least 10 seconds, and were associated with a 4% or greater drop in oxygen saturation as measured by finger pulse oximetry. The total AHI was defined as the number of apneas and hypopneas per hour of sleep. OSA was defined as AHI  $\geq 5$ . Severity of OSA was measured by the AHI. A subject was

considered to have mild OSA if the AHI was 5-14, moderate OSA if the AHI was 15-29, and severe OSA if the AHI was  $\geq 30$ . PAP titration was performed following the American Academy of Sleep Medicine recommendations<sup>2,3</sup>.

Adherence to the treatment was monitored using smart card technology embedded in the PAP machines (average adherence among the complete patient cohort:  $5.45 \pm 1.37$  days/week used;  $88.9 \pm 15.3$  % of days used, with  $67.7 \pm 25.0$  % of days used  $> 4$  hours/night). In addition, co-existent diagnosis of hypertension (9/15 patients), T2DM (4/15 patients), congestive heart failure (4/15 patients) or dyslipidemia (3/15 patients) were also registered. Supplementary table S1 lists the demographic and clinical characteristics of these patients. All the participants provided written informed consent and the research protocol was approved by the research ethical board at the University of Chicago (protocol # 10-702-A-CR004). For each patient, blood was collected by venipuncture in the fasting state within 1 hour from awakening before start receiving PAP treatment (PRE- group), as well as after 6 weeks of treatment (POST-group). Both venipunctures were performed in the sleep laboratory after the patients awakened from the overnight in-laboratory polysomnogram. Peripheral blood mononuclear cells (PBMCs) were isolated using gradient centrifugation and the CD14+ monocytes fraction was isolated using the Milteny Biotec MACS magnetic cell separation system, as described elsewhere<sup>4</sup>. DNA was isolated from the isolated CD14+ monocytes using the DNeasy kit (Qiagen, Valencia, CA), according to manufacturer's instructions. DNA was quantified and quality assessed by absorbance measurement using Nanodrop (Thermo Scientific, Wilmington, DE) and DNA integrity was verified by agarose gel electrophoresis. Isolated DNA was stored at  $-20$  °C until use.

**Microarray-based DNA profiling.** DNA methylation profiles before and after treatment for the patients exhibiting the highest POST/PRE AHI ratios ( $n=6$ ) were assessed using a MeDIP-chip strategy. First,  $1.5$   $\mu\text{g}$  of fragmented DNA was immunoprecipitated using an antibody against 5-methylcytosine (Eurogentec-AnaSpec, Inc. Fremont, CA) following the MeDIP protocol<sup>5</sup>. Immunoprecipitated DNA was amplified using an adaptor mediated PCR strategy, as described elsewhere<sup>6</sup> and subsequently fragmented, biotin-labeled, and hybridized on Affymetrix GeneChip Human Promoter Array 1.0R (Affymetrix, Santa Clara, CA) and scanned, according to manufacturer's protocol. The array consisted of over 4.6 million probes tiled to interrogate over 25,000 human promoter regions. Probes in the microarray were tiled at an average resolution of 35 base pairs, as measured from the central position of adjacent 25-mer oligos, leaving a gap of approximately 10 base pairs between probes. Each promoter region covered approximately 7.5 kb upstream through 2.5 kb downstream of 5' transcription start sites. The array interrogates regions proximal to transcription start sites, covering approximately 59 percent of the annotated CpG islands (NCBI Build 34/hg16)

**Microarray data analysis.** The data set(s) supporting the results of this article is available in the NCBI's Gene Expression Omnibus (GEO) repository (Accession number: GSE73053)

Microarray data was processed as previously described <sup>7</sup>. In brief, raw data (.cel files) was managed using the Partek® Genomic Suite® Software, version 6.6 (Partek Inc., St. Louis, MO, USA). Data pre-processing consisted of probe sequence adjustment, Robust Multichip Averaging (RMA) <sup>8</sup> background correction, quantile normalization and log<sub>2</sub> transformation. The relationship between samples was examined by Multidimensional scaling (MDS) analysis. Normalized signals in the PRE and POST groups were compared using Analysis of Variance (ANOVA) and t-statistic were calculated for each probe. Regions of differential DNA methylation were identified using the Model-based Analysis of Tiling-arrays (MAT) <sup>9</sup> algorithm. A sliding window of fixed genomic length (500 bp) was applied and MAT score of each window was generated using the trimmed mean of probe t-statistics, which is calculated by taking the average of all probes within a window excluding 10% of the highest and lowest probes. Only regions containing more than 10 probes were considered for further analysis. Windows at p-value < 0.001 and absolute MAT scores >4 were considered as significant. Regions with positive and negative MAT scores represent hyper- and hypo-methylated regions in the POST group as compared to PRE, respectively. Regions supported by less than 80% of the probes were removed from further analysis. The probe locations were obtained from the array's annotation file and genome coordinates were updated to the GRCh37/hg19 build using the LiftOver tool at the UCSC genome browser. Promoter and gene associations were annotated comparing genomic coordinates against the RefSeq transcript annotation of human reference genome assembly. Networks and pathways significantly enriched in the genes of interest were identified through Ingenuity Pathways Analysis (IPA) (Ingenuity® Systems, [www.ingenuity.com](http://www.ingenuity.com)). Significance of the enrichment is calculated Fisher's exact test right-tailed, with a cutoff of p-value=0.05. Statistical analysis were further performed using R statistical environment (version 3.1.3) <sup>10</sup>.

**Single-locus DNA methylation analysis.** Microarray data was verified by single locus analysis of 8 loci previously identified as PPAR targets using a SYBR-green based real-time PCR analysis of the MeDIP DNA for all samples in the study (n=15). We decided to focus our single locus analysis in this group of genes, since our DNA methylation arrays showed an enrichment on mechanisms of gene regulation by PPARs in both canonical pathways and gene network analyses, and given the widely-recognized role of PPARG in inflammation and macrophage biology<sup>11,12</sup>. The 8 PPAR response elements were selected from the literature on the base of being reported PPARG targets<sup>13-21</sup>. The location of the PPARE were identified either by experimental data reported from the literature and/or a computational approach (Dragon PPAR Response Element (PPRE) Spotter v.2.0 <http://www.cbrc.kaust.edu.sa/ppre/index.php>). The immunoprecipitated DNA methylation fraction (IP fraction) was diluted 1:20 in 1X low TE buffer containing

250 ng/ $\mu$ L salmon sperm DNA and 5  $\mu$ L of this dilution were subjected to real-time PCR. The reaction consisted of 1 $\times$  ABI master mix containing Taq polymerase, dNTPs, SYBR green dye and ROX as passive dye (Life Technologies, Carlsbad, CA, USA) and 200 nM of specific primers (Supplementary Material Table S5). The PCR program started with a Taq polymerase activation step (10 min at 95°C) followed by 40 cycles at 95°C for 15 s, 60°C for 1 min and 95°C for 15 s. Data analyses were performed using the 7500 System SDS software version 1.4 (Applied Biosystems). An aliquot (10 %) of the input material in the MeDIP analysis (IN fraction) was used as reference and the % of Input fraction recovery was calculated as: % recovery =  $100 * (2^{((Ct_{IN} - 3.32) - Ct_{IP})})$ . Fold changes between the POST and PRE groups was calculated as the ratio of % recovery between the two groups.

## References:

- 1 Iber C, American Academy of Sleep Medicine. The AASM manual for the scoring of sleep and associated events : rules, terminology, and technical specifications. Westchester, IL: American Academy of Sleep Medicine, 2007;
- 2 Kushida CA, Chediak A, Berry RB, et al. Clinical guidelines for the manual titration of positive airway pressure in patients with obstructive sleep apnea. J Clin Sleep Med 2008; 4:157-171
- 3 Berry RB, Chediak A, Brown LK, et al. Best clinical practices for the sleep center adjustment of noninvasive positive pressure ventilation (NPPV) in stable chronic alveolar hypoventilation syndromes. J Clin Sleep Med 2010; 6:491-509
- 4 Kheirandish-Gozal L, Wang Y, Duggan RC, et al. Nitric oxide production by monocytes in children with OSA and endothelial dysfunction. Clin Sci (Lond) 2014; 127:323-330
- 5 Mohn F, Weber M, Schubeler D, et al. Methylated DNA immunoprecipitation (MeDIP). Methods Mol Biol 2009; 507:55-64
- 6 Cortese R, Kwan A, Lalonde E, et al. Epigenetic markers of prostate cancer in plasma circulating DNA. Hum Mol Genet 2012; 21:3619-3631
- 7 Cortese R, Khalyfa A, Bao R, et al. Epigenomic profiling in visceral white adipose tissue of offspring of mice exposed to late gestational sleep fragmentation. Int J Obes (Lond) 2015
- 8 Irizarry RA, Hobbs B, Collin F, et al. Exploration, normalization, and summaries of high density oligonucleotide array probe level data. Biostatistics 2003; 4:249-264
- 9 Johnson WE, Li W, Meyer CA, et al. Model-based analysis of tiling-arrays for ChIP-chip. Proc Natl Acad Sci U S A 2006; 103:12457-12462
- 10 Team RC. R: A Language and Environment for Statistical Computing. Vienna, Austria, 2015

- 11 Lee CH, Evans RM. Peroxisome proliferator-activated receptor-gamma in macrophage lipid homeostasis. *Trends Endocrinol Metab* 2002; 13:331-335
- 12 Kratz M, Coats BR, Hisert KB, et al. Metabolic dysfunction drives a mechanistically distinct proinflammatory phenotype in adipose tissue macrophages. *Cell Metab* 2014; 20:614-625
- 13 Daffu G, Shen X, Senatus L, et al. RAGE Suppresses ABCG1-Mediated Macrophage Cholesterol Efflux in Diabetes. *Diabetes* 2015; 64:4046-4060
- 14 Nicholson AC, Hajjar DP. CD36, oxidized LDL and PPAR gamma: pathological interactions in macrophages and atherosclerosis. *Vascul Pharmacol* 2004; 41:139-146
- 15 Parsons MS, Barrett L, Little C, et al. Harnessing CD36 to rein in inflammation. *Endocr Metab Immune Disord Drug Targets* 2008; 8:184-191
- 16 Katano-Toki A, Satoh T, Tomaru T, et al. THRAP3 interacts with HELZ2 and plays a novel role in adipocyte differentiation. *Mol Endocrinol* 2013; 27:769-780
- 17 Guan HP, Ishizuka T, Chui PC, et al. Corepressors selectively control the transcriptional activity of PPARgamma in adipocytes. *Genes Dev* 2005; 19:453-461
- 18 Lin H, Yu CH, Jen CY, et al. Adiponectin-mediated heme oxygenase-1 induction protects against iron-induced liver injury via a PPARalpha dependent mechanism. *Am J Pathol* 2010; 177:1697-1709
- 19 Minge CE, Ryan NK, Van Der Hoek KH, et al. Troglitazone regulates peroxisome proliferator-activated receptors and inducible nitric oxide synthase in murine ovarian macrophages. *Biol Reprod* 2006; 74:153-160
- 20 Sears DD, Hsiao A, Ofrecio JM, et al. Selective modulation of promoter recruitment and transcriptional activity of PPARgamma. *Biochem Biophys Res Commun* 2007; 364:515-521
- 21 Lefebvre B, Benomar Y, Guedin A, et al. Proteasomal degradation of retinoid X receptor alpha reprograms transcriptional activity of PPARgamma in obese mice and humans. *J Clin Invest* 2010; 120:1454-1468

**e-Figure 1.**

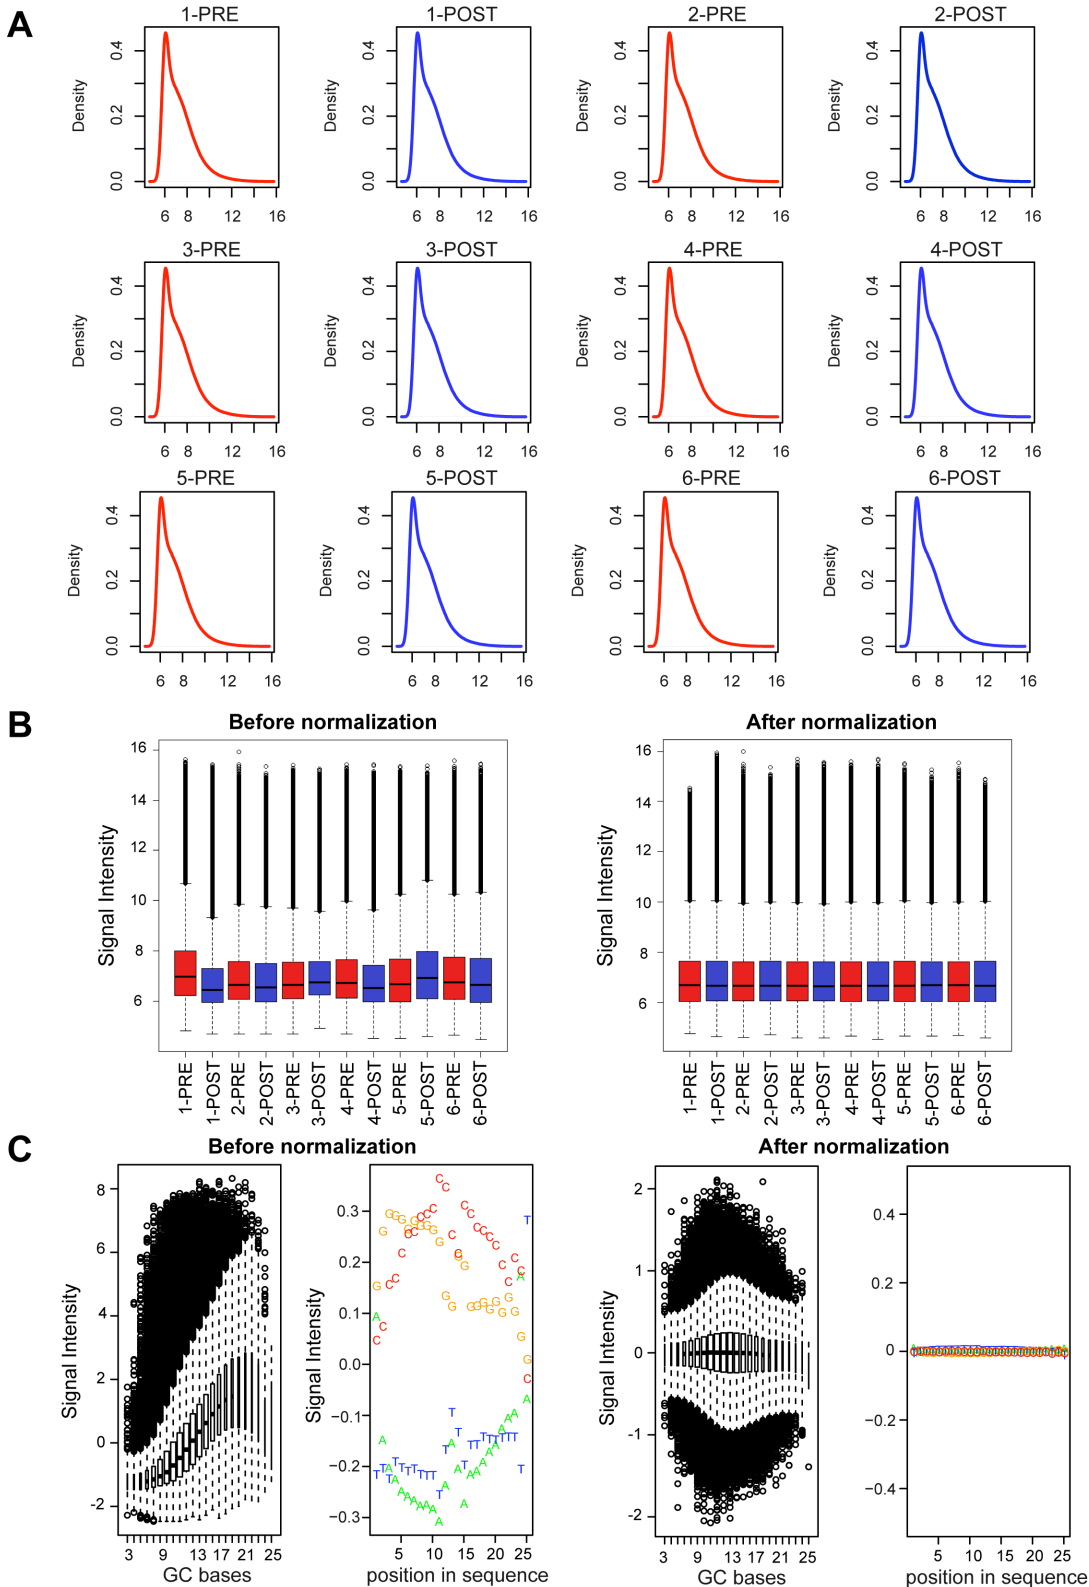

**e-Figure 2.**

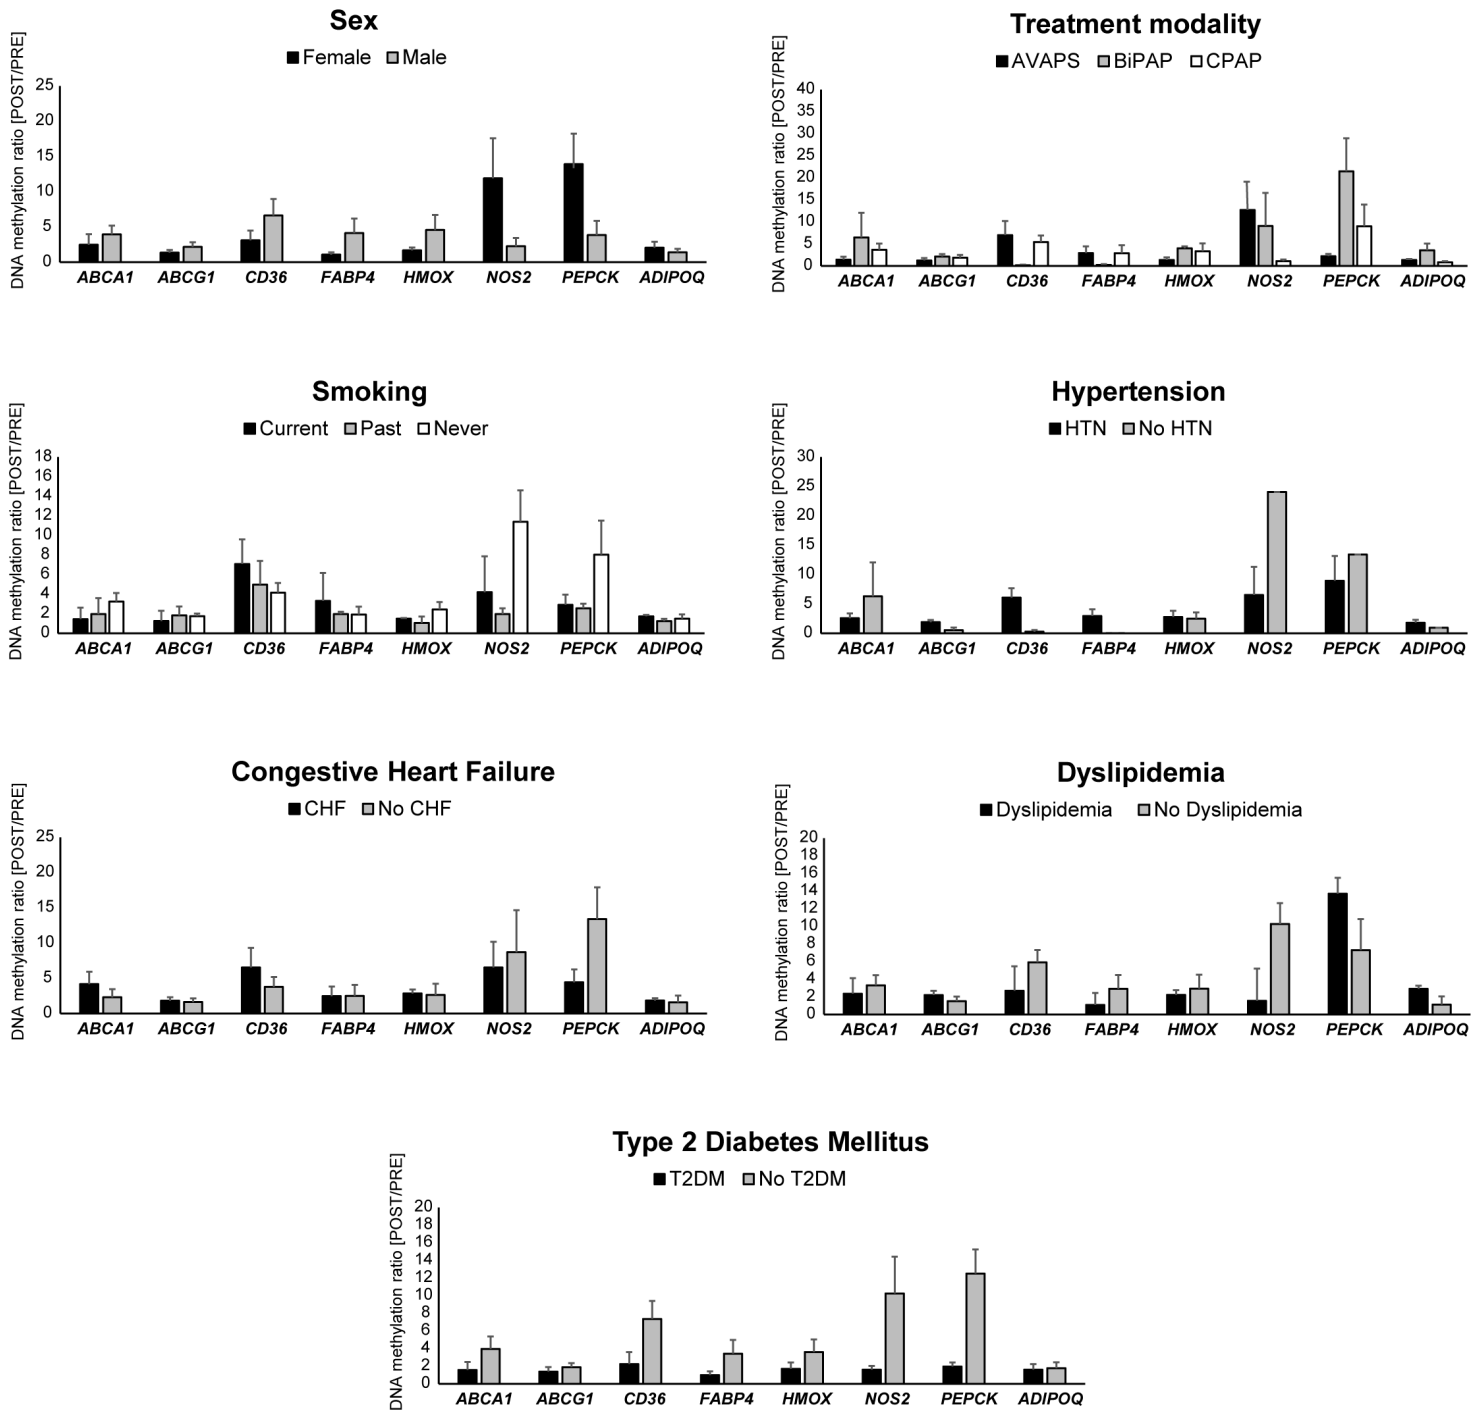



**e-Table 1:** Primer sequences for MeDIP-qPCR assays for PPAR-targeted genes.

| Gene Symbol | Gene Name                                            | Primer 1 sequence    | Primer 2 sequence     | Size [bp] |
|-------------|------------------------------------------------------|----------------------|-----------------------|-----------|
| ABCA1       | ATP-binding cassette, sub-family A (ABC1), member 1  | AAAAGGAAGGAATCACCGA  | AAGGACACAATGTAGCAGTT  | 119       |
| ABCG1       | ATP-binding cassette, sub-family G (WHITE), member 1 | TCTCCTTTCTCTCCTTCGAT | AAGGAGGCACAGCTTTTAT   | 101       |
| ADIPOQ      | adiponectin                                          | taggaagtttctccgtcaga | cccttatttgctcctaca    | 103       |
| CD36        | CD36 molecule (thrombospondin receptor)              | tcagcaagtcagttcctttt | ttctggtgaagaccattac   | 114       |
| FABP4       | fatty acid binding protein 4, adipocyte              | TGACGAAAATCCTCTCTCAC | TGCAGCAGAAGGAATAACAT  | 115       |
| HMOX        | heme oxygenase 1                                     | AGGTCAGTTGTAGGGATGAA | CTCCTCACACCCTCTTTAAA  | 103       |
| NOS2        | nitric oxide synthase 2, inducible                   | catccctccatcactacaga | cagttcaggtaaacagcactc | 119       |
| PEPCK       | phosphoenolpyruvate carboxykinase 1 (soluble)        | TCTTAGGTAGAGAGGCTTCC | CTTGCTGGAGTTTGGAGAA   | 105       |

**e-Table 2:** Demographic and clinical data for the patients in the study.

| <b>Demographics</b> |            |     |        |                  |
|---------------------|------------|-----|--------|------------------|
| Sample ID           | Microarray | Age | Sex    | Ethnicity        |
| 1                   | YES        | 60  | Female | African American |
| 2                   | YES        | 65  | Female | African American |
| 3                   | YES        | 45  | Male   | African American |
| 4                   | YES        | 54  | Female | African American |
| 5                   | YES        | 41  | Female | African American |
| 6                   | YES        | 49  | Female | African American |
| 7                   | NO         | 51  | Male   | African American |
| 8                   | NO         | 59  | Female | African American |
| 9                   | NO         | 36  | Male   | African American |
| 10                  | NO         | 73  | Female | African American |
| 11                  | NO         | 48  | Male   | African American |
| 12                  | NO         | 56  | Male   | African American |
| 13                  | NO         | 33  | Male   | Hispanic         |
| 14                  | NO         | 47  | Female | African American |
| 15                  | NO         | 47  | Female | African American |

| <b>Treatment details</b> |                 |                                           |                                    |                                                  |
|--------------------------|-----------------|-------------------------------------------|------------------------------------|--------------------------------------------------|
| <b>ID</b>                | <b>Modality</b> | <b>PAP adherence (mean all days used)</b> | <b>PAP adherence (% days used)</b> | <b>PAP adherence (% days used above 4 hours)</b> |
| 1                        | CPAP            | 6.4                                       | 100                                | 97.1                                             |
| 2                        | BiPAP           | 6.6                                       | 100                                | 86.8                                             |
| 3                        | CPAP            | 6.02                                      | 94                                 | 84                                               |
| 4                        | AVAPS           | 3.82                                      | 90.7                               | 46.5                                             |
| 5                        | BiPAP           | 6.37                                      | 100                                | 88.6                                             |
| 6                        | CPAP            | 6.18                                      | 100                                | 83.3                                             |
| 7                        | BiPAP           | 3.1                                       | 93.2                               | 27.3                                             |
| 8                        | AVAPS           | 5.27                                      | 84                                 | 72                                               |
| 9                        | AVAPS           | 2.7                                       | 64.3                               | 32.1                                             |
| 10                       | CPAP            | 6.82                                      | 96.2                               | 67.3                                             |
| 11                       | AVAPS           | 3.95                                      | 88                                 | 48                                               |
| 12                       | AVAPS           | 6.02                                      | 97.7                               | 86                                               |
| 13                       | CPAP            | 6.77                                      | 90.7                               | 86                                               |
| 14                       | AVAPS           | 6.9                                       | 93                                 | 90.7                                             |
| 15                       | CPAP            | 4.9                                       | 42                                 | 20                                               |

| <b>Pre-Post treatment physiological values</b> |                                           |             |             |                        |             |             |                      |             |             |
|------------------------------------------------|-------------------------------------------|-------------|-------------|------------------------|-------------|-------------|----------------------|-------------|-------------|
| <b>ID</b>                                      | <b>AHI (events/hour total sleep time)</b> |             |             | <b>4% ODI (/hrTST)</b> |             |             | <b>T90 (minutes)</b> |             |             |
|                                                | <b>pre</b>                                | <b>post</b> | <b>diff</b> | <b>pre</b>             | <b>post</b> | <b>diff</b> | <b>pre</b>           | <b>post</b> | <b>diff</b> |
| 1                                              | 118.1                                     | 2.9         | 115.2       | 117.5                  | 4.6         | 112.9       | 257.6                | 7.2         | 250.4       |
| 2                                              | 65.3                                      | 5.9         | 59.4        | 65.5                   | 9.3         | 56.2        | 65.5                 | 7.2         | 58.3        |
| 3                                              | 81.9                                      | 1.5         | 80.4        | 74.1                   | 1.2         | 72.9        | 217.3                | 1.3         | 216         |
| 4                                              | 118.3                                     | 1.4         | 116.9       | 117.5                  | 1.9         | 115.6       | 327.6                | 1.6         | 326         |
| 5                                              | 52.5                                      | 1.5         | 51          | 114.5                  | 0           | 114.5       | 204.5                | 0           | 204.5       |
| 6                                              | 110.2                                     | 9.6         | 100.6       | 160.2                  | 9.6         | 150.6       | 257.1                | 25.7        | 231.4       |
| 7                                              | 91.3                                      | 3.9         | 87.4        | 97.6                   | 8.9         | 88.7        | 290.7                | 15.9        | 274.8       |
| 8                                              | 103.8                                     | 31.3        | 72.5        | 127.9                  | 32.5        | 95.4        | 200.8                | 70.7        | 130.1       |
| 9                                              | 103.6                                     | 35.7        | 67.9        | 111                    | 47          | 64          | 252.9                | 115.8       | 137.1       |
| 10                                             | 65.2                                      | 24.3        | 40.9        | 76.6                   | 25.8        | 50.8        | 224.8                | 88.1        | 136.7       |
| 11                                             | 54                                        | 26.2        | 27.8        | 58                     | 24.8        | 33.2        | 81                   | 80.4        | 0.6         |
| 12                                             | 95.1                                      | 11.3        | 83.8        | 80.4                   | 11          | 69.4        | 274.4                | 49.6        | 224.8       |
| 13                                             | 89.7                                      | 10.6        | 79.1        | 98.1                   | 2.5         | 95.6        | 292.4                | 1.5         | 290.9       |
| 14                                             | 117.6                                     | 3.5         | 114.1       | 127.2                  | 5           | 122.2       | 356                  | 14.5        | 341.5       |
| 15                                             | 8.4                                       | 0.6         | 7.8         | 9.8                    | 1.5         | 8.3         | 6.6                  | 2.1         | 4.5         |

| <b>Pre-Post treatment physiological values (continued)</b> |                                  |             |             |                                  |             |             |                               |             |             |
|------------------------------------------------------------|----------------------------------|-------------|-------------|----------------------------------|-------------|-------------|-------------------------------|-------------|-------------|
| <b>ID</b>                                                  | <b>SpO<sub>2</sub> nadir (%)</b> |             |             | <b>PaCO<sub>2</sub> * (mmHg)</b> |             |             | <b>BMI (kg/m<sup>2</sup>)</b> |             |             |
|                                                            | <b>pre</b>                       | <b>post</b> | <b>diff</b> | <b>pre</b>                       | <b>post</b> | <b>diff</b> | <b>pre</b>                    | <b>post</b> | <b>diff</b> |
| 1                                                          | 64.4                             | 82.9        | -18.5       | 49.3                             | 46.9        | 2.4         | 48.1                          | 46.2        | 1.9         |
| 2                                                          | 58.9                             | 83.9        | -25         | 51.1                             | 44.3        | 6.8         | 37.3                          | 37.4        | -0.1        |
| 3                                                          | 56.8                             | 88.6        | -31.8       | 44.5                             | 35.2        | 9.3         | 42                            | 44.5        | -2.5        |
| 4                                                          | 61.2                             | 88.1        | -26.9       | 46.7                             | 35.6        | 11.1        | 44.1                          | 43.1        | 1           |
| 5                                                          | 55.3                             | 93.6        | -38.3       | 48                               | 42.9        | 5.1         | 77.1                          | 66.7        | 10.4        |
| 6                                                          | 50.1                             | 63.6        | -13.5       | 50.5                             | 41.3        | 9.2         | 55.6                          | 55.9        | -0.3        |
| 7                                                          | 55                               | 83.5        | -28.5       | 71.6                             | 63.8        | 7.8         | 52                            | 48.2        | 3.8         |
| 8                                                          | 54.8                             | 70          | -15.2       | 45.8                             | 40.2        | 5.6         | 38.3                          | 38.7        | -0.4        |
| 9                                                          | 55.9                             | 59          | -3.1        | 51.1                             | 42.8        | 8.3         | 53.2                          | 52.9        | 0.3         |
| 10                                                         | 53.7                             | 63.8        | -10.1       | 53.6                             | 43.4        | 10.2        | 57.2                          | 55.8        | 1.4         |
| 11                                                         | 50.6                             | 65.9        | -15.3       | 44.7                             | 41.1        | 3.6         | 48.9                          | 48.26       | 0.6         |
| 12                                                         | 51.8                             | 78.5        | -26.7       | 52                               | 35.2        | 16.8        | 40                            | 40          | 0           |
| 13                                                         | 50.1                             | 88.9        | -38.8       | 62.4                             | 44.7        | 17.7        | 40.1                          | 41.1        | -1          |
| 14                                                         | 51.5                             | 82.6        | -31.1       | 44                               | 44.1        | -0.1        | 61.2                          | 61.5        | -0.3        |
| 15                                                         | 83.4                             | 89.3        | -5.9        | 48.4                             | 40.8        | 7.6         | 45.6                          | 45.1        | 0.5         |

\*: PaCO<sub>2</sub>= Partial pressure of CO<sub>2</sub> in the arterial blood obtained at 6 weeks after initiating PAP therapy.

| <b>Comorbidities</b> |                |                     |                                 |                                 |                     |
|----------------------|----------------|---------------------|---------------------------------|---------------------------------|---------------------|
| <b>ID</b>            | <b>Smoking</b> | <b>Hypertension</b> | <b>Type 2 diabetes mellitus</b> | <b>Congestive heart failure</b> | <b>Dyslipidemia</b> |
| 1                    | current        | no                  | yes                             | no                              | no                  |
| 2                    | never          | yes                 | no                              | no                              | yes                 |
| 3                    | never          | yes                 | no                              | no                              | no                  |
| 4                    | past           | yes                 | no                              | no                              | no                  |
| 5                    | never          | no                  | no                              | yes                             | no                  |
| 6                    | never          | yes                 | no                              | no                              | no                  |
| 7                    | never          | yes                 | yes                             | yes                             | yes                 |
| 8                    | past           | yes                 | yes                             | no                              | no                  |
| 9                    | current        | yes                 | no                              | yes                             | no                  |
| 10                   | past           | yes                 | yes                             | yes                             | yes                 |
| 11                   | never          | yes                 | no                              | yes                             | no                  |
| 12                   | never          | yes                 | yes                             | no                              | yes                 |
| 13                   | never          | yes                 | no                              | no                              | no                  |
| 14                   | current        | yes                 | no                              | yes                             | no                  |
| 15                   | never          | yes                 | no                              | no                              | no                  |

**e-Table 3:** Differentially DNA methylated regions between PRE and POST groups.

| Coordinates               | Length | # probes | p-value  | MAT-score | Transcript type | Gene symbol | Distance to TSS |
|---------------------------|--------|----------|----------|-----------|-----------------|-------------|-----------------|
| chr10:1372012-1373260     | 1249   | 33       | 8.08E-06 | 7.22      | RefSeq          | ADARB2      | 396411          |
| chr13:113510138-113512001 | 1864   | 48       | 8.08E-06 | 6.36      | RefSeq          | LINC00452   | 3867            |
| chr18:75725595-75727061   | 1467   | 40       | 8.08E-06 | 6.34      | RefSeq          | KCNG2       | 939             |
| chr17:77701017-77702693   | 1677   | 46       | 8.08E-06 | 6.29      | RefSeq          | CCDC57      | 61286           |
| chr11:111248820-111249661 | 842    | 24       | 8.08E-06 | 6.1       | RefSeq          | ALG9        | -1304           |
| chr17:77910324-77911148   | 825    | 18       | 8.08E-06 | 6.04      | RefSeq          | TEX19       | 0               |
| chr7:100388396-100389290  | 895    | 26       | 8.08E-06 | 6.02      | RefSeq          | MUC3A       | 3408            |
| chr15:81010226-81010914   | 689    | 21       | 8.08E-06 | 5.75      | RefSeq          | CPEB1       | 26715           |
| chr22:48948622-48949878   | 1257   | 34       | 8.08E-06 | 5.52      | RefSeq          | PANX2       | -1409           |
| chr1:112969380-112970190  | 811    | 23       | 8.08E-06 | 5.43      | RefSeq          | CAPZA1      | 5782            |
| chr18:70381919-70382707   | 789    | 22       | 8.08E-06 | 5.39      | RefSeq          | CNDP1       | 29247           |
| chr9:72218932-72219646    | 715    | 20       | 8.08E-06 | 5.35      | RefSeq          | KLF9        | 0               |
| chr1:55277778-55278666    | 889    | 22       | 8.08E-06 | 5.31      | RefSeq          | PCSK9       | 41              |
| chr19:7008172-7009009     | 838    | 25       | 8.08E-06 | 5.3       | RefSeq          | MBD3L3      | 637             |
| chr12:13038273-13039025   | 753    | 19       | 8.08E-06 | 5.29      | RefSeq          | HEBP1       | 5486            |
| chr11:2881744-2882577     | 834    | 19       | 8.08E-06 | 5.23      | RefSeq          | SLC22A18    | 1656            |
| chr8:67673216-67673873    | 658    | 19       | 8.08E-06 | 5.22      | RefSeq          | MYBL1       | 14166           |
| chr17:35097485-35098366   | 882    | 25       | 8.08E-06 | 5.21      | RefSeq          | ERBB2       | 0               |
| chr6:546547-547487        | 941    | 20       | 8.08E-06 | 5.2       | RefSeq          | EXOC2       | 90655           |
| chr3:171195493-171196125  | 633    | 17       | 8.08E-06 | 5.19      | RefSeq          | SEC62       | 28219           |
| chr16:69255066-69255914   | 849    | 23       | 8.08E-06 | 5.19      | RefSeq          | MTSS1L      | 21542           |
| chr12:113329046-113329897 | 852    | 24       | 8.08E-06 | 5.11      | RefSeq          | TBX5        | 734             |
| chr2:72997421-72998042    | 622    | 17       | 8.08E-06 | 5.11      | RefSeq          | EMX1        | -70             |
| chr5:176230640-176232948  | 2309   | 60       | 8.08E-06 | 5.1       | RefSeq          | UNC5A       | 60474           |
| chr21:37300697-37301276   | 580    | 16       | 8.08E-06 | 5.09      | RefSeq          | RIPPLY3     | 0               |
| chr15:98914126-98916379   | 2254   | 59       | 8.08E-06 | 5.07      | ncRNA           | PRKXP1      | 633             |
| chr16:65531324-65532117   | 794    | 22       | 8.08E-06 | 5.07      | RefSeq          | CES2        | 5476            |
| chr7:151566456-151567147  | 692    | 20       | 8.08E-06 | 5.06      | RefSeq          | KMT2C       | 196877          |
| chr7:157845745-157846960  | 1216   | 35       | 8.08E-06 | 5.05      | RefSeq          | PTPRN2      | 226284          |
| chr19:6168037-6168807     | 771    | 23       | 8.08E-06 | 5.04      | RefSeq          | MLLT1       | 62153           |
| chr8:347618-348380        | 763    | 22       | 8.08E-06 | 5.04      | RefSeq          | FBXO25      | 810             |
| chr9:139186433-139187221  | 789    | 20       | 8.08E-06 | 5.04      | RefSeq          | TMEM210     | -113            |
| chr11:133293153-133293964 | 812    | 22       | 8.08E-06 | 5.04      | RefSeq          | IGSF9B      | 37896           |
| chr1:199446299-199447161  | 863    | 23       | 8.08E-06 | 5.02      | RefSeq          | IGFN1       | 19723           |
| chr5:52127026-52127685    | 660    | 19       | 8.08E-06 | 5.01      | RefSeq          | PELO        | 7495            |
| chr7:27172252-27172907    | 656    | 19       | 8.08E-06 | 5.01      | RefSeq          | HOXA9       | -577            |

|                           |     |    |          |      |        |          |        |
|---------------------------|-----|----|----------|------|--------|----------|--------|
| chr17:23901780-23902431   | 652 | 16 | 8.08E-06 | 5.01 | RefSeq | UNC119   | 1343   |
| chr16:55038657-55039439   | 783 | 22 | 8.08E-06 | 5.01 | RefSeq | NUDT21   | 3324   |
| chr2:46600411-46601179    | 769 | 22 | 1.62E-05 | 4.95 | RefSeq | ATP6V1E2 | 0      |
| chr11:62119050-62119700   | 651 | 18 | 1.62E-05 | 4.91 | RefSeq | MTA2     | 6189   |
| chr3:46717877-46718651    | 775 | 22 | 1.62E-05 | 4.79 | RefSeq | TMIE     | 50     |
| chr19:58387162-58387770   | 609 | 18 | 2.42E-05 | 4.74 | RefSeq | ZNF665   | 662    |
| chr10:44817627-44818496   | 870 | 25 | 2.42E-05 | 4.73 | RefSeq | C10orf25 | -1150  |
| chr4:104161782-104162598  | 817 | 23 | 3.23E-05 | 4.72 | RefSeq | SLC9B1   | -1436  |
| chr11:29989288-29990156   | 869 | 24 | 3.23E-05 | 4.72 | RefSeq | KCNA4    | 4998   |
| chr17:52345523-52346023   | 501 | 14 | 3.23E-05 | 4.71 | RefSeq | TRIM25   | 386    |
| chr5:55564379-55564956    | 578 | 16 | 4.04E-05 | 4.69 | RefSeq | ANKRD55  | 0      |
| chr11:60661878-60662370   | 493 | 14 | 4.04E-05 | 4.68 | RefSeq | VPS37C   | 23123  |
| chr5:147422468-147423134  | 667 | 18 | 4.04E-05 | 4.68 | RefSeq | SPINK5   | -594   |
| chr14:100362766-100363624 | 859 | 24 | 4.85E-05 | 4.67 | ncRNA  | MEG3     | 568    |
| chr15:32180417-32181036   | 620 | 18 | 4.85E-05 | 4.67 | RefSeq | EMC7     | 310    |
| chr1:34054131-34054683    | 553 | 11 | 5.65E-05 | 4.65 | RefSeq | CSMD2    | 348780 |
| chr1:156230180-156230748  | 569 | 16 | 5.65E-05 | 4.65 | RefSeq | KIRREL   | 493    |
| chr6:50895875-50896502    | 628 | 16 | 5.65E-05 | 4.65 | RefSeq | TFAP2B   | 1477   |
| chr15:83325685-83326229   | 545 | 14 | 5.65E-05 | 4.64 | RefSeq | PDE8A    | 937    |
| chr11:124485958-124486529 | 572 | 16 | 5.65E-05 | 4.63 | RefSeq | TMEM218  | 286    |
| chr5:14195580-14196164    | 585 | 16 | 5.65E-05 | 4.62 | RefSeq | TRIO     | -665   |
| chr14:24115524-24116329   | 806 | 23 | 6.46E-05 | 4.62 | RefSeq | CTSG     | -217   |
| chr7:86617609-86618187    | 579 | 16 | 6.46E-05 | 4.61 | RefSeq | DMTF1    | -1426  |
| chr5:158226796-158227589  | 794 | 22 | 6.46E-05 | 4.59 | RefSeq | EBF1     | 231778 |
| chr20:60987414-60987962   | 549 | 15 | 6.46E-05 | 4.59 | RefSeq | DIDO1    | 40387  |
| chr2:74129059-74129624    | 566 | 16 | 6.46E-05 | 4.59 | RefSeq | TET3     | 62020  |
| chr7:44977192-44977876    | 685 | 16 | 6.46E-05 | 4.59 | RefSeq | MYO1G    | 7354   |
| chr17:18069275-18069786   | 512 | 11 | 6.46E-05 | 4.58 | RefSeq | LLGL1    | 0      |
| chrX:70280593-70281363    | 771 | 22 | 7.27E-05 | 4.57 | RefSeq | NLGN3    | -43    |
| chr4:109312508-109313093  | 586 | 17 | 8.08E-05 | 4.56 | ncRNA  | LEF1-AS1 | 0      |
| chr8:95974250-95974863    | 614 | 18 | 8.89E-05 | 4.56 | RefSeq | CCNE2    | 1796   |
| chr19:10807192-10807762   | 571 | 16 | 9.69E-05 | 4.56 | RefSeq | TMED1    | 222    |
| chr17:37792928-37793757   | 830 | 23 | 9.69E-05 | 4.55 | RefSeq | STAT3    | 283    |
| chr12:97566871-97567514   | 644 | 18 | 9.69E-05 | 4.55 | RefSeq | APAF1    | 3662   |
| chr6:71722993-71723557    | 565 | 16 | 9.69E-05 | 4.55 | RefSeq | B3GAT2   | 0      |
| chr17:21011297-21011790   | 494 | 14 | 9.69E-05 | 4.54 | RefSeq | DHRS7B   | 40464  |
| chr19:42644345-42645053   | 709 | 20 | 9.69E-05 | 4.53 | RefSeq | ZNF569   | 5127   |
| chr20:62266436-62267027   | 592 | 17 | 1.05E-04 | 4.52 | RefSeq | MYT1     | 165    |
| chr13:45523147-45523702   | 556 | 16 | 1.05E-04 | 4.51 | RefSeq | ZC3H13   | 1196   |

|                           |     |    |          |      |        |              |         |
|---------------------------|-----|----|----------|------|--------|--------------|---------|
| chr14:64071253-64071808   | 556 | 15 | 1.05E-04 | 4.51 | ncRNA  | LOC102723809 | 5032    |
| chr6:32481602-32482408    | 807 | 22 | 1.05E-04 | 4.51 | RefSeq | BTNL2        | 471     |
| chr4:6524318-6524940      | 623 | 16 | 1.13E-04 | 4.5  | RefSeq | PPP2R2C      | 91289   |
| chr19:40259567-40260196   | 630 | 16 | 1.13E-04 | 4.5  | ncRNA  | HPN-AS1      | 28820   |
| chr8:2873501-2874292      | 792 | 22 | 1.13E-04 | 4.5  | RefSeq | CSMD1        | 1965445 |
| chr4:167016214-167016764  | 551 | 15 | 1.13E-04 | 4.49 | RefSeq | TLL1         | 2354    |
| chr8:125532040-125532675  | 636 | 18 | 1.13E-04 | 4.49 | RefSeq | TRMT12       | 0       |
| chr9:138395027-138395412  | 386 | 11 | 1.13E-04 | 4.49 | RefSeq | SNAPC4       | 17299   |
| chr6:35803227-35803838    | 612 | 18 | 1.13E-04 | 4.49 | RefSeq | FKBP5        | 501     |
| chrX:48724856-48725345    | 490 | 15 | 1.13E-04 | 4.49 | RefSeq | GRIPAP1      | 18275   |
| chr7:149702018-149702558  | 541 | 16 | 1.13E-04 | 4.48 | RefSeq | REPIN1       | 5206    |
| chr11:46319631-46320317   | 687 | 14 | 1.13E-04 | 4.47 | RefSeq | DGKZ         | 8600    |
| chr12:16391275-16391910   | 636 | 18 | 1.29E-04 | 4.47 | RefSeq | MGST1        | 0       |
| chr22:28025994-28026453   | 460 | 12 | 1.29E-04 | 4.46 | RefSeq | EWSR1        | 31996   |
| chr20:13921702-13922422   | 721 | 20 | 1.29E-04 | 4.46 | ncRNA  | SEL1L2       | 1558    |
| chr7:65343708-65344349    | 642 | 13 | 1.29E-04 | 4.45 | RefSeq | TPST1        | 36014   |
| chr14:102869868-102870386 | 519 | 14 | 1.29E-04 | 4.45 | RefSeq | EIF5         | 0       |
| chr1:159367892-159368526  | 635 | 18 | 1.29E-04 | 4.44 | RefSeq | DEDD         | 577     |
| chr14:54585618-54586063   | 446 | 13 | 1.29E-04 | 4.44 | RefSeq | SOCS4        | 22024   |
| chr7:79978606-79979120    | 515 | 14 | 1.29E-04 | 4.43 | RefSeq | GNAT3        | 59      |
| chr17:7687453-7687964     | 512 | 15 | 1.29E-04 | 4.43 | RefSeq | KDM6B        | 3493    |
| chr18:43827258-43827759   | 502 | 13 | 1.29E-04 | 4.43 | RefSeq | ZBTB7C       | 89920   |
| chr19:35125703-35126276   | 574 | 13 | 1.29E-04 | 4.43 | RefSeq | URI1         | 19312   |
| chr11:61315987-61316672   | 686 | 19 | 1.29E-04 | 4.43 | RefSeq | FEN1         | -13     |
| chr3:127904943-127905653  | 711 | 20 | 1.29E-04 | 4.43 | RefSeq | CHCHD6       | -100    |
| chr19:4464636-4465166     | 531 | 15 | 1.29E-04 | 4.42 | RefSeq | PLIN4        | 3551    |
| chr8:144493314-144494023  | 710 | 22 | 1.29E-04 | 4.42 | RefSeq | TOP1MT       | 19500   |
| chr3:130203764-130204448  | 685 | 20 | 1.29E-04 | 4.42 | RefSeq | EFCC1        | 602     |
| chr8:42867849-42868347    | 499 | 12 | 1.29E-04 | 4.42 | RefSeq | RNF170       | 2677    |
| chr1:120415201-120415876  | 676 | 19 | 1.29E-04 | 4.42 | RefSeq | NOTCH2       | -1360   |
| chr2:238397465-238397996  | 532 | 14 | 1.29E-04 | 4.42 | RefSeq | RBM44        | 25338   |
| chr16:54157818-54158523   | 706 | 20 | 1.29E-04 | 4.41 | RefSeq | LPCAT2       | 57404   |
| chr1:76032373-76033017    | 645 | 19 | 1.29E-04 | 4.41 | RefSeq | RABGGTB      | 7906    |
| chr8:131019094-131019923  | 830 | 23 | 1.37E-04 | 4.41 | RefSeq | FAM49B       | 1378    |
| chr16:46049083-46049586   | 504 | 14 | 1.37E-04 | 4.4  | RefSeq | ITFG1        | 2931    |
| chr4:187350186-187350767  | 582 | 16 | 1.37E-04 | 4.4  | RefSeq | CYP4V2       | 518     |
| chr12:116023515-116024039 | 525 | 15 | 1.37E-04 | 4.4  | ncRNA  | TESC-AS1     | 1860    |
| chr3:176924106-176924752  | 647 | 19 | 1.37E-04 | 4.4  | RefSeq | NAALADL2     | 864301  |
| chr7:92949643-92950198    | 556 | 16 | 1.37E-04 | 4.39 | RefSeq | CALCR        | 91781   |



|                           |     |    |          |      |        |           |        |
|---------------------------|-----|----|----------|------|--------|-----------|--------|
| chr11:104386623-104387209 | 587 | 17 | 1.45E-04 | 4.39 | RefSeq | CASP5     | 11897  |
| chr1:102085108-102085698  | 591 | 16 | 1.45E-04 | 4.39 | RefSeq | OLFM3     | 0      |
| chr15:67391285-67392077   | 793 | 23 | 1.45E-04 | 4.39 | RefSeq | PAQR5     | 12937  |
| chr14:88327188-88327795   | 608 | 17 | 1.45E-04 | 4.39 | RefSeq | EML5      | 1055   |
| chr1:201587156-201587695  | 540 | 12 | 1.45E-04 | 4.39 | RefSeq | FMOD      | 0      |
| chr4:77152550-77153171    | 622 | 18 | 1.53E-04 | 4.38 | RefSeq | ART3      | 1193   |
| chr3:113054011-113054770  | 760 | 18 | 1.53E-04 | 4.38 | RefSeq | PHLDB2    | 119994 |
| chr19:7647341-7647940     | 600 | 18 | 1.53E-04 | 4.37 | RefSeq | MCEMP1    | -3     |
| chr16:74870627-74871319   | 693 | 20 | 1.53E-04 | 4.37 | RefSeq | CNTNAP4   | 1950   |
| chr3:125295211-125295823  | 613 | 14 | 1.70E-04 | 4.37 | RefSeq | KALRN     | -425   |
| chr17:618119-618784       | 666 | 19 | 1.78E-04 | 4.36 | RefSeq | GLOD4     | 13538  |
| chr5:140054847-140055388  | 542 | 15 | 1.78E-04 | 4.36 | RefSeq | HARS2     | 3652   |
| chr7:104696210-104696750  | 541 | 15 | 1.78E-04 | 4.36 | RefSeq | SRPK2     | 29713  |
| chr9:131636807-131637307  | 501 | 15 | 1.78E-04 | 4.36 | RefSeq | USP20     | -210   |
| chr2:128284444-128284960  | 517 | 15 | 1.78E-04 | 4.36 | RefSeq | WDR33     | 272    |
| chr12:119117013-119117590 | 578 | 16 | 1.78E-04 | 4.36 | RefSeq | GCN1L1    | -116   |
| chr3:44259790-44260366    | 577 | 16 | 1.86E-04 | 4.36 | RefSeq | TOPAZ1    | 1408   |
| chr17:2915143-2915737     | 595 | 17 | 1.86E-04 | 4.36 | RefSeq | OR1D5     | -1491  |
| chr7:102682193-102682685  | 493 | 14 | 1.86E-04 | 4.36 | ncRNA  | DPY19L2P2 | 25311  |
| chr2:217205308-217205845  | 538 | 15 | 1.86E-04 | 4.36 | RefSeq | IGFBP2    | -527   |
| chr2:113657310-113657863  | 554 | 16 | 1.86E-04 | 4.36 | RefSeq | PSD4      | 9279   |
| chr19:55239376-55240170   | 795 | 23 | 2.02E-04 | 4.35 | RefSeq | ZNF473    | 18352  |
| chr3:121292832-121293488  | 657 | 19 | 2.02E-04 | 4.35 | RefSeq | GSK3B     | 2467   |
| chr19:53866440-53867202   | 763 | 21 | 2.02E-04 | 4.34 | RefSeq | NTN5      | 875    |
| chr4:141483934-141484580  | 647 | 15 | 2.02E-04 | 4.34 | RefSeq | SCOC      | 0      |
| chr7:2439168-2439701      | 534 | 15 | 2.02E-04 | 4.34 | RefSeq | CHST12    | 29447  |
| chr10:74683255-74683882   | 628 | 18 | 2.02E-04 | 4.34 | RefSeq | MRPS16    | -797   |
| chr6:161507039-161507540  | 502 | 14 | 2.02E-04 | 4.34 | RefSeq | AGPAT4    | 107558 |
| chr11:101827602-101828261 | 660 | 19 | 2.02E-04 | 4.33 | RefSeq | TMEM123   | 725    |
| chr7:151144743-151145434  | 692 | 20 | 2.02E-04 | 4.33 | RefSeq | PRKAG2    | 59816  |
| chr2:160930020-160930774  | 755 | 22 | 2.02E-04 | 4.33 | RefSeq | RBMS1     | 127791 |
| chr8:96351025-96351839    | 815 | 19 | 2.02E-04 | 4.33 | RefSeq | C8orf37   | -386   |
| chr6:151681824-151682241  | 418 | 11 | 2.02E-04 | 4.33 | RefSeq | AKAP12    | 78997  |
| chr17:61731217-61731820   | 604 | 17 | 2.02E-04 | 4.33 | RefSeq | PRKCA     | 1829   |
| chr12:122998612-122999139 | 528 | 15 | 2.02E-04 | 4.33 | RefSeq | CCDC92    | 23978  |
| chr9:38413606-38414103    | 498 | 14 | 2.02E-04 | 4.33 | RefSeq | IGFBPL1   | 342    |
| chr19:53801716-53802219   | 504 | 15 | 2.02E-04 | 4.33 | RefSeq | FAM83E    | 6288   |
| chr10:135013478-135014130 | 653 | 18 | 2.02E-04 | 4.33 | RefSeq | PRAP1     | 2644   |
| chr1:173230492-173230997  | 506 | 14 | 2.02E-04 | 4.32 | RefSeq | RABGAP1L  | 29964  |

Online supplements are not copyedited prior to posting and the author(s) take full responsibility for the accuracy of all data.



|                           |     |    |          |      |        |           |       |
|---------------------------|-----|----|----------|------|--------|-----------|-------|
| chr10:70330227-70330907   | 681 | 14 | 2.02E-04 | 4.32 | RefSeq | DDX50     | -133  |
| chr4:141663390-141663906  | 517 | 15 | 2.02E-04 | 4.32 | RefSeq | ELMOD2    | -856  |
| chr5:39255326-39255949    | 624 | 17 | 2.02E-04 | 4.32 | RefSeq | FYB       | 50568 |
| chr5:112283649-112284171  | 523 | 14 | 2.02E-04 | 4.31 | RefSeq | REEP5     | 1760  |
| chr17:44007445-44008019   | 575 | 16 | 2.02E-04 | 4.31 | RefSeq | HOXB3     | -635  |
| chr3:89237532-89238125    | 594 | 17 | 2.02E-04 | 4.31 | RefSeq | EPHA3     | -1239 |
| chr1:110975779-110976589  | 811 | 22 | 2.02E-04 | 4.31 | RefSeq | KCNA2     | -159  |
| chr1:152416696-152417225  | 530 | 15 | 2.02E-04 | 4.31 | RefSeq | TPM3      | 5125  |
| chr1:120063856-120064401  | 546 | 11 | 2.02E-04 | 4.31 | RefSeq | PHGDH     | 7914  |
| chr2:3362888-3363402      | 515 | 11 | 2.02E-04 | 4.31 | RefSeq | TRAPPC12  | 435   |
| chr5:86742542-86743246    | 705 | 20 | 2.02E-04 | 4.31 | RefSeq | CCNH      | 1232  |
| chr14:22424320-22424696   | 377 | 11 | 2.02E-04 | 4.31 | RefSeq | REM2      | 2048  |
| chr3:8787041-8787708      | 668 | 16 | 2.02E-04 | 4.31 | RefSeq | OXTR      | -740  |
| chr4:30330498-30331095    | 598 | 14 | 2.02E-04 | 4.31 | RefSeq | PCDH7     | -40   |
| chr12:9776758-9777310     | 553 | 16 | 2.02E-04 | 4.3  | RefSeq | CLECL1    | 0     |
| chr6:168220260-168220775  | 516 | 14 | 2.02E-04 | 4.3  | RefSeq | FRMD1     | -864  |
| chr6:32123613-32124309    | 697 | 20 | 2.02E-04 | 4.3  | RefSeq | TNXB      | 60821 |
| chr1:158268658-158269224  | 567 | 13 | 2.02E-04 | 4.3  | RefSeq | PIGM      | -250  |
| chr11:128279499-128280041 | 543 | 12 | 2.02E-04 | 4.3  | RefSeq | KCNJ5     | 12976 |
| chr3:45860015-45860672    | 658 | 18 | 2.02E-04 | 4.3  | RefSeq | LZTFL1    | 71549 |
| chr1:111735264-111735964  | 701 | 18 | 2.02E-04 | 4.3  | ncRNA  | PGCP1     | -1267 |
| chr14:22946829-22947377   | 549 | 16 | 2.10E-04 | 4.29 | RefSeq | MYH6      | 0     |
| chr19:14798232-14798886   | 655 | 18 | 2.10E-04 | 4.29 | RefSeq | OR7A5     | 1391  |
| chr11:626516-627152       | 637 | 17 | 2.10E-04 | 4.29 | RefSeq | DRD4      | -153  |
| chr17:23679313-23679947   | 635 | 18 | 2.18E-04 | 4.29 | RefSeq | IFT20     | 6696  |
| chr7:27210064-27210826    | 763 | 22 | 2.18E-04 | 4.29 | ncRNA  | HOTTIP    | 3499  |
| chrX:152792974-152793687  | 714 | 20 | 2.18E-04 | 4.29 | RefSeq | L1CAM     | 1008  |
| chr6:142508442-142508957  | 516 | 12 | 2.18E-04 | 4.28 | RefSeq | VTA1      | -1035 |
| chr9:35717672-35718410    | 739 | 22 | 2.26E-04 | 4.28 | RefSeq | TLN1      | 3983  |
| chr3:188053769-188054293  | 525 | 15 | 2.26E-04 | 4.28 | RefSeq | ADIPOQ    | 10612 |
| chr7:158341993-158342504  | 512 | 15 | 2.26E-04 | 4.28 | RefSeq | WDR60     | 0     |
| chr22:23268128-23268848   | 721 | 20 | 2.26E-04 | 4.28 | RefSeq | GUCD1     | 13056 |
| chr12:56114873-56115364   | 492 | 14 | 2.26E-04 | 4.28 | RefSeq | INHBC     | 138   |
| chr8:58355077-58355831    | 755 | 21 | 2.42E-04 | 4.27 | ncRNA  | LINC00588 | 421   |
| chr6:10636575-10637188    | 614 | 18 | 2.42E-04 | 4.27 | RefSeq | GCNT2     | 7021  |
| chr21:39738942-39739541   | 600 | 17 | 2.42E-04 | 4.27 | RefSeq | SH3BGR    | -126  |
| chr2:87830043-87830562    | 520 | 15 | 2.42E-04 | 4.27 | RefSeq | PLGLB1    | 1318  |
| chr4:156831056-156831655  | 600 | 17 | 2.42E-04 | 4.26 | RefSeq | GUCY1A3   | 23744 |
| chr2:20113420-20114124    | 705 | 20 | 2.42E-04 | 4.26 | RefSeq | LAPTM4A   | 1147  |

Online supplements are not copyedited prior to posting and the author(s) take full responsibility for the accuracy of all data.





|                           |     |    |          |      |        |          |        |
|---------------------------|-----|----|----------|------|--------|----------|--------|
| chr16:31178628-31179349   | 722 | 18 | 2.42E-04 | 4.26 | RefSeq | ITGAM    | 0      |
| chr16:1930831-1931656     | 826 | 24 | 2.50E-04 | 4.26 | RefSeq | MSRB1    | 1640   |
| chrY:2878885-2879419      | 535 | 15 | 2.50E-04 | 4.26 | RefSeq | ZFY      | 15367  |
| chr19:43817332-43817936   | 605 | 17 | 2.59E-04 | 4.26 | RefSeq | EIF3K    | 15778  |
| chr1:199229828-199230427  | 600 | 17 | 2.59E-04 | 4.26 | RefSeq | KIF21B   | 29025  |
| chr17:15844991-15845790   | 800 | 20 | 2.67E-04 | 4.26 | RefSeq | ZSWIM7   | -1259  |
| chr2:71070399-71070892    | 494 | 14 | 2.67E-04 | 4.26 | RefSeq | TEX261   | 4618   |
| chr11:1542682-1543403     | 722 | 20 | 2.67E-04 | 4.26 | RefSeq | DUSP8    | 6324   |
| chr11:124866399-124866891 | 493 | 14 | 2.67E-04 | 4.26 | RefSeq | FEZ1     | 4526   |
| chr1:173112099-173112788  | 690 | 20 | 2.67E-04 | 4.26 | RefSeq | RABGAP1L | 820    |
| chr11:45071541-45072027   | 487 | 12 | 2.75E-04 | 4.25 | ncRNA  | PRDM11   | -113   |
| chr6:158512571-158513060  | 490 | 14 | 2.75E-04 | 4.25 | RefSeq | GTF2H5   | 3204   |
| chr19:45882595-45883230   | 636 | 17 | 2.75E-04 | 4.25 | RefSeq | NUMBL    | 5174   |
| chr3:57417535-57418019    | 485 | 14 | 2.91E-04 | 4.25 | RefSeq | DNAH12   | 87093  |
| chrX:26143987-26144586    | 600 | 17 | 2.91E-04 | 4.25 | RefSeq | MAGEB5   | 0      |
| chr1:114103241-114103871  | 631 | 17 | 2.91E-04 | 4.25 | RefSeq | PHTF1    | 0      |
| chrX:134884972-134885636  | 665 | 19 | 2.91E-04 | 4.25 | RefSeq | MMGT1    | -1171  |
| chr12:11353513-11354131   | 619 | 17 | 2.91E-04 | 4.25 | RefSeq | PRB4     | 506    |
| chr19:60361754-60362377   | 624 | 18 | 2.91E-04 | 4.24 | RefSeq | TNNI3    | -841   |
| chr17:75367992-75368531   | 540 | 15 | 2.91E-04 | 4.24 | RefSeq | CBX2     | 1420   |
| chr1:205696237-205696739  | 503 | 11 | 2.91E-04 | 4.24 | RefSeq | CR2      | 1969   |
| chr1:43661890-43662470    | 581 | 15 | 2.91E-04 | 4.24 | RefSeq | SZT2     | 33747  |
| chr12:123449552-123450039 | 488 | 14 | 2.91E-04 | 4.24 | RefSeq | NCOR2    | 167925 |
| chr10:105446270-105446784 | 515 | 14 | 2.91E-04 | 4.24 | RefSeq | SH3PXD2A | 158371 |
| chr22:19697957-19698496   | 540 | 16 | 2.91E-04 | 4.23 | RefSeq | P2RX6    | -946   |
| chr3:52064416-52064947    | 532 | 16 | 2.91E-04 | 4.23 | RefSeq | DUSP7    | 555    |
| chr7:139122919-139123416  | 498 | 15 | 2.91E-04 | 4.23 | RefSeq | HIPK2    | 747    |
| chr5:137547796-137548491  | 696 | 20 | 2.91E-04 | 4.23 | RefSeq | KIF20A   | 5480   |
| chrX:41433822-41434476    | 655 | 18 | 2.91E-04 | 4.23 | RefSeq | GPR34    | 652    |
| chr17:41845539-41846030   | 492 | 14 | 2.91E-04 | 4.23 | ncRNA  | NSFP1    | 39617  |
| chr3:197118841-197119420  | 580 | 17 | 2.99E-04 | 4.23 | RefSeq | TNK2     | 858    |
| chrX:69414066-69414623    | 558 | 16 | 2.99E-04 | 4.22 | RefSeq | ARR3     | 9156   |
| chr4:123493985-123494678  | 694 | 20 | 2.99E-04 | 4.22 | RefSeq | KIAA1109 | 182777 |
| chr20:54405890-54406417   | 528 | 15 | 2.99E-04 | 4.22 | RefSeq | CSTF1    | 5056   |
| chr17:75936157-75936686   | 530 | 15 | 2.99E-04 | 4.22 | RefSeq | RNF213   | 86902  |
| chr19:55999590-56000145   | 556 | 16 | 3.07E-04 | 4.22 | RefSeq | C19orf48 | 0      |
| chr1:89791394-89791920    | 527 | 15 | 3.07E-04 | 4.22 | RefSeq | LRRC8B   | 28409  |
| chr13:40452845-40453337   | 493 | 13 | 3.15E-04 | 4.21 | RefSeq | ELF1     | 1082   |
| chr12:2867356-2867934     | 579 | 17 | 3.15E-04 | 4.21 | RefSeq | RHNO1    | 10730  |

Online supplements are not copyedited prior to posting and the author(s) take full responsibility for the accuracy of all data.

|                           |     |    |          |      |        |          |        |
|---------------------------|-----|----|----------|------|--------|----------|--------|
| chr11:116240936-116241499 | 564 | 16 | 3.15E-04 | 4.21 | RefSeq | SIK3     | 232843 |
| chr19:40534735-40535226   | 492 | 13 | 3.15E-04 | 4.21 | RefSeq | FFAR1    | 450    |
| chr1:202448402-202448923  | 522 | 15 | 3.15E-04 | 4.21 | RefSeq | GOLT1A   | 921    |
| chr2:132890677-132891225  | 549 | 15 | 3.15E-04 | 4.21 | RefSeq | GPR39    | 60     |
| chr17:43268193-43268915   | 723 | 19 | 3.15E-04 | 4.21 | RefSeq | LRRC46   | 4201   |
| chr17:53759381-53760270   | 890 | 25 | 3.15E-04 | 4.2  | RefSeq | BZRAP1   | 882    |
| chr16:55261543-55262144   | 602 | 17 | 3.15E-04 | 4.2  | RefSeq | MT1H     | 316    |
| chr15:44905395-44906276   | 882 | 25 | 3.15E-04 | 4.2  | ncRNA  | MIR548A3 | 320778 |
| chr8:81246883-81247370    | 488 | 13 | 3.15E-04 | 4.2  | RefSeq | TPD52    | -433   |
| chr1:7835644-7836156      | 513 | 15 | 3.15E-04 | 4.2  | RefSeq | UTS2     | 0      |
| chr15:90737238-90737722   | 485 | 13 | 3.15E-04 | 4.19 | RefSeq | ST8SIA2  | -422   |
| chr18:28305386-28305864   | 479 | 12 | 3.15E-04 | 4.19 | RefSeq | GAREM    | -940   |
| chr10:61571876-61572395   | 520 | 15 | 3.23E-04 | 4.19 | RefSeq | ANK3     | -1095  |
| chr15:63158229-63158747   | 519 | 15 | 3.23E-04 | 4.19 | RefSeq | KBTBD13  | 2022   |
| chr11:123995136-123995651 | 516 | 14 | 3.23E-04 | 4.19 | RefSeq | PANX3    | 8473   |
| chr17:4819293-4819801     | 509 | 15 | 3.23E-04 | 4.19 | RefSeq | CAMTA2   | 11884  |
| chr15:75499634-75500291   | 658 | 19 | 3.31E-04 | 4.19 | RefSeq | HMG20A   | -7     |
| chr5:101597847-101598596  | 750 | 22 | 3.31E-04 | 4.19 | RefSeq | SLCO4C1  | 61557  |
| chr7:134116768-134117371  | 604 | 15 | 3.31E-04 | 4.19 | RefSeq | CALD1    | 2064   |
| chr10:38148594-38149130   | 537 | 16 | 3.31E-04 | 4.19 | RefSeq | ZNF248   | 37441  |
| chr3:180450743-180451310  | 568 | 16 | 3.39E-04 | 4.19 | RefSeq | KCNMB3   | 16223  |
| chr14:60517942-60518558   | 617 | 18 | 3.39E-04 | 4.19 | RefSeq | SLC38A6  | 357    |
| chr8:125649984-125650867  | 884 | 22 | 3.47E-04 | 4.19 | RefSeq | MTSS1    | 159063 |
| chrX:57164360-57164951    | 592 | 16 | 3.47E-04 | 4.19 | RefSeq | SPIN2B   | 0      |
| chr11:111446608-111447381 | 774 | 22 | 3.47E-04 | 4.18 | RefSeq | PIH1D2   | 2725   |
| chr9:21219621-21220229    | 609 | 17 | 3.47E-04 | 4.18 | RefSeq | IFNA17   | -1399  |
| chr3:2118270-2118775      | 506 | 12 | 3.47E-04 | 4.18 | RefSeq | CNTN4    | 2720   |
| chr3:38507428-38507987    | 560 | 14 | 3.47E-04 | 4.18 | RefSeq | ACVR2B   | 36634  |
| chr22:45402065-45402606   | 542 | 17 | 3.47E-04 | 4.18 | RefSeq | GRAMD4   | 743    |
| chr5:172688513-172689023  | 511 | 14 | 3.47E-04 | 4.18 | RefSeq | STC2     | 90     |
| chr7:130019260-130019747  | 488 | 14 | 3.47E-04 | 4.18 | RefSeq | TSGA13   | 2200   |
| chr4:83565214-83565716    | 503 | 15 | 3.47E-04 | 4.18 | RefSeq | HNRNPDL  | 4687   |
| chr9:94471489-94472075    | 587 | 16 | 3.47E-04 | 4.18 | RefSeq | IPPK     | 294    |
| chr1:211474522-211475020  | 499 | 14 | 3.55E-04 | 4.18 | RefSeq | RPS6KC1  | 183324 |
| chr21:39480327-39481059   | 733 | 20 | 3.55E-04 | 4.18 | RefSeq | BRWD1    | 126524 |
| chr20:43029178-43029668   | 491 | 14 | 3.64E-04 | 4.17 | RefSeq | STK4     | 644    |
| chr10:104460033-104460600 | 568 | 17 | 3.64E-04 | 4.17 | RefSeq | ARL3     | 3581   |
| chr6:636823-637484        | 662 | 18 | 3.64E-04 | 4.17 | RefSeq | EXOC2    | 658    |
| chr9:42009000-42009518    | 519 | 14 | 3.64E-04 | 4.17 | ncRNA  | KGFLP2   | 67     |



|                           |     |    |          |      |        |             |        |
|---------------------------|-----|----|----------|------|--------|-------------|--------|
| chrX:86659146-86659680    | 535 | 15 | 3.72E-04 | 4.17 | RefSeq | KLHL4       | 0      |
| chr8:141843336-141843826  | 491 | 14 | 3.72E-04 | 4.17 | RefSeq | PTK2        | 236769 |
| chr9:135315024-135315555  | 532 | 13 | 3.72E-04 | 4.17 | RefSeq | CACFD1      | 116    |
| chr9:86472391-86472924    | 534 | 15 | 3.72E-04 | 4.17 | RefSeq | NTRK2       | -1491  |
| chr11:59187743-59188289   | 547 | 15 | 3.72E-04 | 4.17 | RefSeq | PATL1       | 4799   |
| chr12:48900488-48901103   | 616 | 16 | 3.72E-04 | 4.17 | RefSeq | LIMA1       | 62518  |
| chr9:34715192-34715677    | 486 | 15 | 3.72E-04 | 4.17 | RefSeq | FAM205A     | 3859   |
| chr1:109851420-109851969  | 550 | 16 | 3.72E-04 | 4.17 | RefSeq | AMIGO1      | 1891   |
| chr19:56540182-56540792   | 611 | 17 | 3.72E-04 | 4.17 | RefSeq | ETFB        | 9117   |
| chr10:127366016-127366533 | 518 | 15 | 3.72E-04 | 4.16 | ncRNA  | LOC283038   | 4214   |
| chr11:65303829-65304330   | 502 | 15 | 3.72E-04 | 4.16 | RefSeq | AP5B1       | 309    |
| chr2:111590269-111590880  | 612 | 16 | 3.72E-04 | 4.16 | RefSeq | ACOXL       | 383648 |
| chr19:53834078-53834852   | 775 | 19 | 3.72E-04 | 4.16 | RefSeq | CA11        | 6412   |
| chr9:16724105-16724666    | 562 | 16 | 3.72E-04 | 4.16 | RefSeq | BNC2        | 136121 |
| chr14:23728433-23729115   | 683 | 19 | 3.72E-04 | 4.16 | RefSeq | TM9SF1      | 5668   |
| chr21:34818634-34819152   | 519 | 15 | 3.72E-04 | 4.16 | RefSeq | RCAN1       | 88861  |
| chr8:124337008-124337580  | 573 | 16 | 3.72E-04 | 4.16 | RefSeq | ZHX1        | 18329  |
| chrX:10762861-10763610    | 750 | 17 | 3.72E-04 | 4.16 | RefSeq | MID1        | -1130  |
| chr5:36640647-36641180    | 534 | 15 | 3.72E-04 | 4.16 | RefSeq | SLC1A3      | -1034  |
| chr9:103542018-103542599  | 582 | 17 | 3.72E-04 | 4.16 | RefSeq | GRIN3A      | -1334  |
| chr12:10440551-10441433   | 883 | 20 | 3.72E-04 | 4.15 | RefSeq | KLRC4-KLRK1 | 12580  |
| chr1:154449301-154449787  | 487 | 14 | 3.72E-04 | 4.15 | RefSeq | PMF1        | 0      |
| chr3:4730055-4730629      | 575 | 16 | 3.72E-04 | 4.15 | RefSeq | ITPR1       | 220023 |
| chr9:98840712-98841254    | 543 | 14 | 3.72E-04 | 4.15 | RefSeq | CTSV        | 493    |
| chr3:50349956-50350472    | 517 | 15 | 3.72E-04 | 4.15 | RefSeq | RASSF1      | 2900   |
| chr1:19795766-19796287    | 522 | 16 | 3.72E-04 | 4.15 | RefSeq | MINOS1      | 0      |
| chr1:15919488-15920004    | 517 | 15 | 3.72E-04 | 4.15 | RefSeq | PLEKHM2     | 36074  |
| chr15:43590155-43590724   | 570 | 17 | 3.72E-04 | 4.15 | RefSeq | SLC30A4     | 11571  |
| chr4:13207117-13207878    | 762 | 21 | 3.72E-04 | 4.15 | RefSeq | BOD1L1      | 30549  |
| chr11:124056410-124056920 | 511 | 11 | 3.72E-04 | 4.15 | RefSeq | SPA17       | 7460   |
| chr19:15612230-15612750   | 521 | 14 | 3.72E-04 | 4.15 | RefSeq | CYP4F3      | 0      |
| chr5:61735065-61735795    | 731 | 20 | 3.72E-04 | 4.15 | RefSeq | DIMT1       | 0      |
| chr20:33462295-33462958   | 664 | 14 | 3.72E-04 | 4.15 | RefSeq | UQCC1       | 402    |
| chr15:75257540-75258039   | 500 | 14 | 3.80E-04 | 4.15 | RefSeq | PEAK1       | 241463 |
| chrX:68317487-68318204    | 718 | 21 | 3.80E-04 | 4.15 | ncRNA  | LINC00269   | 1362   |
| chr12:49705088-49705584   | 497 | 10 | 3.80E-04 | 4.15 | RefSeq | SLC11A2     | 883    |
| chr4:69851139-69851925    | 787 | 21 | 3.80E-04 | 4.15 | RefSeq | UGT2A3      | 174    |
| chr3:123034870-123035390  | 521 | 15 | 3.80E-04 | 4.15 | RefSeq | IQCB1       | 1227   |
| chr10:103103897-103104410 | 514 | 15 | 3.80E-04 | 4.14 | RefSeq | BTRC        | 117    |

Online supplements are not copyedited prior to posting and the author(s) take full responsibility for the accuracy of all data.

|                           |     |    |          |      |        |            |        |
|---------------------------|-----|----|----------|------|--------|------------|--------|
| chr2:27968622-27968986    | 365 | 11 | 3.80E-04 | 4.14 | RefSeq | BRE        | 1636   |
| chr10:105026228-105026782 | 555 | 16 | 3.88E-04 | 4.14 | RefSeq | INA        | -128   |
| chr11:95164442-95165033   | 592 | 17 | 3.88E-04 | 4.14 | RefSeq | CEP57      | 1169   |
| chr8:144171620-144172275  | 656 | 19 | 3.88E-04 | 4.14 | RefSeq | LY6E       | 343    |
| chr14:44676764-44677252   | 489 | 14 | 3.88E-04 | 4.14 | RefSeq | FANCM      | 1878   |
| chr11:3211540-3212316     | 777 | 22 | 3.88E-04 | 4.14 | RefSeq | MRGPPE     | -1347  |
| chr10:111971081-111971685 | 605 | 17 | 3.88E-04 | 4.14 | RefSeq | MXI1       | 11102  |
| chr6:88062062-88062711    | 650 | 19 | 3.88E-04 | 4.14 | RefSeq | GJB7       | 33005  |
| chr6:43256337-43256839    | 503 | 14 | 3.96E-04 | 4.14 | RefSeq | SRF        | 8231   |
| chr6:44234228-44235124    | 897 | 24 | 3.96E-04 | 4.14 | RefSeq | CAPN11     | 0      |
| chr12:87056010-87056667   | 658 | 17 | 3.96E-04 | 4.14 | RefSeq | CEP290     | 3458   |
| chr4:1273552-1274066      | 515 | 12 | 3.96E-04 | 4.14 | RefSeq | MAEA       | 0      |
| chr3:26639863-26640589    | 727 | 21 | 3.96E-04 | 4.13 | RefSeq | LRRC3B     | 559    |
| chr2:210446347-210446887  | 541 | 15 | 3.96E-04 | 4.13 | RefSeq | UNC80      | 101385 |
| chr4:184660849-184661467  | 619 | 16 | 3.96E-04 | 4.13 | ncRNA  | LOC389247  | 1196   |
| chr2:114010577-114011099  | 523 | 15 | 3.96E-04 | 4.13 | ncRNA  | PGM5P4-AS1 | 5639   |
| chr2:131130235-131130803  | 569 | 14 | 3.96E-04 | 4.13 | RefSeq | POTEJ      | 44659  |
| chr11:105385538-105386201 | 664 | 18 | 3.96E-04 | 4.13 | RefSeq | MSANTD4    | 11964  |
| chr14:89597066-89597858   | 793 | 21 | 3.96E-04 | 4.13 | RefSeq | KCNK13     | -4     |
| chr9:113326547-113327270  | 724 | 21 | 3.96E-04 | 4.13 | RefSeq | ZNF483     | 0      |
| chr4:106692403-106693017  | 615 | 18 | 3.96E-04 | 4.13 | RefSeq | ARHGEF38   | -209   |
| chr20:3794899-3795439     | 541 | 16 | 3.96E-04 | 4.13 | RefSeq | MAVS       | 19453  |
| chr1:42158524-42159016    | 493 | 13 | 3.96E-04 | 4.12 | ncRNA  | HIVEP3     | -1440  |
| chr6:124000539-124001095  | 557 | 16 | 3.96E-04 | 4.12 | RefSeq | TRDN       | -601   |
| chr17:3748740-3749224     | 485 | 14 | 3.96E-04 | 4.12 | RefSeq | P2RX1      | 17486  |
| chr12:103203761-103204357 | 597 | 17 | 3.96E-04 | 4.12 | RefSeq | TXNRD1     | 70074  |
| chr8:143819866-143820432  | 567 | 17 | 3.96E-04 | 4.12 | RefSeq | SLURP1     | 400    |
| chr16:87523691-87524291   | 601 | 17 | 3.96E-04 | 4.12 | RefSeq | CBFA2T3    | 46715  |
| chr17:37143657-37144264   | 608 | 17 | 3.96E-04 | 4.12 | RefSeq | HAP1       | 161    |
| chr20:3695485-3695859     | 375 | 11 | 3.96E-04 | 4.12 | RefSeq | C20orf27   | 594    |
| chr5:148188191-148188822  | 632 | 18 | 3.96E-04 | 4.12 | RefSeq | ADRB2      | 1842   |
| chr2:197377049-197377583  | 535 | 15 | 3.96E-04 | 4.12 | RefSeq | C2orf66    | 5663   |
| chr11:4858573-4859105     | 533 | 15 | 3.96E-04 | 4.12 | RefSeq | OR51T1     | -520   |
| chr22:16769606-16770250   | 645 | 19 | 3.96E-04 | 4.12 | RefSeq | MICAL3     | 0      |
| chr6:117694685-117695252  | 568 | 16 | 3.96E-04 | 4.12 | RefSeq | VGLL2      | 1271   |
| chr7:148591920-148592574  | 655 | 19 | 3.96E-04 | 4.12 | RefSeq | ZNF783     | 1725   |
| chr4:147778661-147779256  | 596 | 16 | 3.96E-04 | 4.12 | RefSeq | POU4F2     | -239   |
| chrX:78508537-78509066    | 530 | 15 | 3.96E-04 | 4.11 | RefSeq | ITM2A      | 640    |
| chr7:140357454-140357958  | 505 | 14 | 3.96E-04 | 4.11 | RefSeq | MRPS33     | 2991   |

|                           |     |    |          |      |        |            |        |
|---------------------------|-----|----|----------|------|--------|------------|--------|
| chr17:5346903-5347724     | 822 | 19 | 4.04E-04 | 4.11 | RefSeq | NLRP1      | 80833  |
| chr6:55846016-55846516    | 501 | 13 | 4.04E-04 | 4.11 | RefSeq | BMP5       | 1819   |
| chr19:59735640-59736261   | 622 | 17 | 4.04E-04 | 4.11 | ncRNA  | KIR3DX1    | 0      |
| chr20:14264174-14264708   | 535 | 15 | 4.04E-04 | 4.11 | RefSeq | FLRT3      | 1606   |
| chr3:159311175-159311841  | 667 | 19 | 4.04E-04 | 4.11 | RefSeq | RSRC1      | 640    |
| chr12:10657295-10657986   | 692 | 19 | 4.04E-04 | 4.11 | RefSeq | MAGOHB     | -450   |
| chr17:24014352-24014927   | 576 | 16 | 4.04E-04 | 4.11 | RefSeq | SUPT6H     | 923    |
| chr6:147564767-147565506  | 740 | 19 | 4.04E-04 | 4.11 | ncRNA  | STXBP5-AS1 | 1938   |
| chr17:24066132-24066661   | 530 | 15 | 4.12E-04 | 4.1  | RefSeq | RAB34      | 2753   |
| chr2:152398466-152399294  | 829 | 24 | 4.12E-04 | 4.1  | RefSeq | CACNB4     | 264546 |
| chr10:111673758-111674297 | 540 | 16 | 4.12E-04 | 4.1  | RefSeq | XPNPEP1    | -456   |
| chr4:142852944-142853625  | 682 | 17 | 4.12E-04 | 4.1  | RefSeq | IL15       | 75745  |
| chr1:156491827-156492393  | 567 | 16 | 4.12E-04 | 4.1  | RefSeq | CD1A       | 1276   |
| chr11:87710342-87710914   | 573 | 15 | 4.12E-04 | 4.1  | RefSeq | CTSC       | 0      |
| chr12:12763326-12764142   | 817 | 23 | 4.12E-04 | 4.1  | RefSeq | CDKN1B     | 1855   |
| chr1:36408408-36408919    | 512 | 15 | 4.12E-04 | 4.1  | RefSeq | MAP7D1     | 14255  |
| chr17:55325558-55326055   | 498 | 14 | 4.12E-04 | 4.1  | RefSeq | TUBD1      | -469   |
| chr18:11841783-11842357   | 575 | 16 | 4.12E-04 | 4.1  | RefSeq | GNAL       | 100312 |
| chr10:126423956-126424485 | 530 | 15 | 4.12E-04 | 4.1  | RefSeq | FAM53B     | -1035  |
| chr12:21699823-21700341   | 519 | 15 | 4.12E-04 | 4.1  | RefSeq | LDHB       | 1655   |
| chr6:49711535-49712056    | 522 | 15 | 4.12E-04 | 4.09 | RefSeq | RHAG       | 491    |
| chr3:139211388-139212014  | 627 | 18 | 4.12E-04 | 4.09 | RefSeq | CLDN18     | 11040  |
| chr16:4602389-4602906     | 518 | 15 | 4.12E-04 | 4.09 | RefSeq | UBALD1     | 2023   |
| chr17:7642225-7642785     | 561 | 16 | 4.12E-04 | 4.09 | RefSeq | DNAH2      | 78461  |
| chr10:103805159-103806013 | 855 | 24 | 4.12E-04 | 4.09 | RefSeq | C10orf76   | 0      |
| chr11:65858859-65859463   | 605 | 17 | 4.12E-04 | 4.09 | RefSeq | RIN1       | 1114   |
| chrX:119380743-119381242  | 500 | 15 | 4.12E-04 | 4.09 | RefSeq | ATP1B4     | 775    |
| chr8:56872809-56873576    | 768 | 21 | 4.12E-04 | 4.09 | RefSeq | TGS1       | 24464  |
| chr12:50184662-50185286   | 625 | 18 | 4.12E-04 | 4.09 | RefSeq | SLC4A8     | 79801  |
| chr10:98019171-98019958   | 788 | 22 | 4.12E-04 | 4.09 | RefSeq | BLNK       | 1366   |
| chr12:81276917-81277423   | 507 | 15 | 4.20E-04 | 4.09 | RefSeq | CCDC59     | -586   |
| chr17:70100019-70100609   | 591 | 16 | 4.20E-04 | 4.08 | RefSeq | CD300LD    | -53    |
| chr12:56130046-56130559   | 514 | 15 | 4.20E-04 | 4.08 | RefSeq | INHBC      | 15311  |
| chr13:52112950-52113515   | 566 | 16 | 4.20E-04 | 4.08 | RefSeq | HNRNPA1L2  | 23344  |
| chr7:45893848-45894427    | 580 | 17 | 4.20E-04 | 4.08 | RefSeq | IGFBP1     | -57    |
| chr5:23558039-23558607    | 569 | 16 | 4.20E-04 | 4.08 | RefSeq | PRDM9      | 14558  |
| chr19:3565842-3566403     | 562 | 13 | 4.20E-04 | 4.08 | RefSeq | CACTIN     | 11411  |
| chr17:43375823-43376342   | 520 | 12 | 4.20E-04 | 4.08 | RefSeq | PNPO       | 1935   |
| chr1:36700430-36700963    | 534 | 15 | 4.20E-04 | 4.08 | RefSeq | MRPS15     | 1665   |



|                           |     |    |          |      |        |           |        |
|---------------------------|-----|----|----------|------|--------|-----------|--------|
| chr4:87496005-87496508    | 504 | 13 | 4.20E-04 | 4.08 | RefSeq | MAPK10    | 96800  |
| chr7:96490236-96490745    | 510 | 13 | 4.20E-04 | 4.08 | RefSeq | DLX5      | 1335   |
| chr17:72380681-72381093   | 413 | 12 | 4.28E-04 | 4.08 | RefSeq | MGAT5B    | 4288   |
| chr19:6452143-6452682     | 540 | 16 | 4.28E-04 | 4.08 | RefSeq | TUBB4A    | 1178   |
| chr19:44083123-44083764   | 642 | 18 | 4.28E-04 | 4.08 | RefSeq | SIRT2     | -780   |
| chr10:75198530-75199054   | 525 | 15 | 4.28E-04 | 4.08 | RefSeq | SEC24C    | 24393  |
| chr1:148021425-148021938  | 514 | 15 | 4.28E-04 | 4.08 | RefSeq | FCGR1A    | 551    |
| chr7:72647870-72648386    | 517 | 15 | 4.28E-04 | 4.08 | RefSeq | MLXIPL    | 28421  |
| chr15:39032271-39032798   | 528 | 14 | 4.28E-04 | 4.07 | RefSeq | CHAC1     | -130   |
| chr19:59541047-59541564   | 518 | 15 | 4.28E-04 | 4.07 | RefSeq | LILRA4    | 670    |
| chr5:50707934-50708534    | 601 | 17 | 4.28E-04 | 4.07 | ncRNA  | LOC642366 | 6390   |
| chr1:247118324-247118909  | 586 | 16 | 4.28E-04 | 4.07 | RefSeq | ZNF692    | 840    |
| chr14:104246263-104246803 | 541 | 15 | 4.28E-04 | 4.07 | RefSeq | INF2      | 19275  |
| chr15:20834571-20835124   | 554 | 15 | 4.28E-04 | 4.07 | ncRNA  | HERC2P2   | 94577  |
| chr9:2629624-2630143      | 520 | 15 | 4.28E-04 | 4.07 | RefSeq | VLDLR     | 17831  |
| chr3:134594254-134594816  | 563 | 16 | 4.28E-04 | 4.07 | RefSeq | TMEM108   | 354432 |
| chr6:30018354-30018869    | 516 | 15 | 4.28E-04 | 4.07 | RefSeq | HLA-A     | 128    |
| chr15:73448283-73448911   | 629 | 18 | 4.28E-04 | 4.07 | RefSeq | SIN3A     | 86267  |
| chr8:6551463-6552000      | 538 | 15 | 4.28E-04 | 4.07 | RefSeq | AGPAT5    | -1286  |
| chr6:29663282-29663791    | 510 | 15 | 4.44E-04 | 4.07 | RefSeq | OR2H2     | 0      |
| chr1:6022829-6023332      | 504 | 12 | 4.44E-04 | 4.07 | RefSeq | KCNAB2    | 5894   |
| chr3:158637404-158637926  | 523 | 15 | 4.44E-04 | 4.07 | RefSeq | VEPH1     | 65905  |
| chr7:129560210-129560825  | 616 | 18 | 4.44E-04 | 4.07 | RefSeq | KLHDC10   | 62625  |
| chr19:842506-843348       | 843 | 23 | 4.44E-04 | 4.07 | RefSeq | MED16     | 871    |
| chr11:89179705-89180353   | 649 | 18 | 4.44E-04 | 4.07 | RefSeq | TRIM49    | 1039   |
| chr4:96016866-96017425    | 560 | 16 | 4.44E-04 | 4.07 | RefSeq | BMPR1B    | 118715 |
| chr12:110373404-110373888 | 485 | 14 | 4.44E-04 | 4.07 | RefSeq | SH2B3     | 16355  |
| chr14:91575455-91576037   | 583 | 16 | 4.44E-04 | 4.07 | RefSeq | TRIP11    | 120    |
| chr6:43086233-43086964    | 732 | 21 | 4.44E-04 | 4.06 | RefSeq | PPP2R5D   | 26018  |
| chr17:45812245-45812963   | 719 | 16 | 4.44E-04 | 4.06 | RefSeq | EME1      | 6665   |
| chr15:49325421-49325934   | 514 | 15 | 4.52E-04 | 4.06 | RefSeq | CYP19A1   | 92154  |
| chr5:175997570-175998164  | 595 | 17 | 4.52E-04 | 4.06 | RefSeq | EIF4E1B   | 7281   |
| chr6:166923124-166924031  | 908 | 25 | 4.52E-04 | 4.06 | RefSeq | RPS6KA2   | 271731 |
| chr6:119713857-119714442  | 586 | 16 | 4.52E-04 | 4.06 | RefSeq | MAN1A1    | -1226  |
| chr20:52526449-52526983   | 535 | 15 | 4.52E-04 | 4.06 | RefSeq | DOK5      | 1031   |
| chr4:85879235-85880045    | 811 | 23 | 4.52E-04 | 4.06 | RefSeq | WDFY3     | 226524 |
| chr1:165355122-165355654  | 533 | 15 | 4.52E-04 | 4.06 | RefSeq | DUSP27    | 24411  |
| chr1:205331293-205331897  | 605 | 17 | 4.60E-04 | 4.06 | RefSeq | C4BPB     | 2086   |
| chr17:55536128-55536739   | 612 | 18 | 4.60E-04 | 4.06 | ncRNA  | LOC653653 | -1065  |

Online supplements are not copyedited prior to posting and the author(s) take full responsibility for the accuracy of all data.

|                           |     |    |          |      |        |            |        |
|---------------------------|-----|----|----------|------|--------|------------|--------|
| chr1:47464747-47465249    | 503 | 14 | 4.60E-04 | 4.06 | RefSeq | TAL1       | 4726   |
| chr11:13324487-13325144   | 658 | 19 | 4.60E-04 | 4.06 | RefSeq | ARNTL      | 68637  |
| chr1:200061863-200062506  | 644 | 17 | 4.60E-04 | 4.06 | RefSeq | NAV1       | 86277  |
| chr16:88625889-88626678   | 790 | 22 | 4.69E-04 | 4.05 | RefSeq | GAS8       | 9380   |
| chr12:39218485-39219005   | 521 | 15 | 4.69E-04 | 4.05 | RefSeq | MUC19      | 145022 |
| chr1:149304097-149304640  | 544 | 16 | 4.69E-04 | 4.05 | RefSeq | MLLT11     | 5322   |
| chr2:211054282-211054778  | 497 | 14 | 4.69E-04 | 4.05 | RefSeq | CPS1       | 3631   |
| chr1:196469698-196470199  | 502 | 14 | 4.69E-04 | 4.05 | RefSeq | NEK7       | 76967  |
| chr9:97119166-97119710    | 545 | 12 | 4.69E-04 | 4.05 | RefSeq | FANCC      | 103    |
| chr15:30694519-30695055   | 537 | 14 | 4.69E-04 | 4.05 | RefSeq | ARHGAP11A  | 0      |
| chr1:10994985-10995674    | 690 | 20 | 4.69E-04 | 4.05 | RefSeq | TARDBP     | 0      |
| chr1:203279081-203279638  | 558 | 16 | 4.69E-04 | 4.05 | RefSeq | CNTN2      | 118    |
| chr6:167814773-167815471  | 699 | 20 | 4.77E-04 | 4.05 | ncRNA  | LOC401286  | 7282   |
| chr15:32618758-32619259   | 502 | 14 | 4.77E-04 | 4.05 | ncRNA  | GOLGA8B    | 43805  |
| chr17:34575439-34576095   | 657 | 19 | 4.77E-04 | 4.05 | RefSeq | ARL5C      | 0      |
| chr17:1567431-1567937     | 507 | 15 | 4.77E-04 | 4.05 | RefSeq | WDR81      | 864    |
| chr15:20265205-20265716   | 512 | 15 | 4.77E-04 | 4.05 | ncRNA  | GOLGA8DP   | 1377   |
| chr4:47182116-47182762    | 647 | 19 | 4.77E-04 | 4.05 | RefSeq | ATP10D     | 0      |
| chr3:95127381-95127868    | 488 | 14 | 4.77E-04 | 4.04 | RefSeq | PROS1      | 47757  |
| chr2:37452859-37453357    | 499 | 13 | 4.77E-04 | 4.04 | RefSeq | QPCT       | 27602  |
| chr4:39448039-39448614    | 576 | 16 | 4.85E-04 | 4.04 | RefSeq | UBE2K      | 71980  |
| chr20:19817193-19817768   | 576 | 16 | 4.85E-04 | 4.04 | RefSeq | RIN2       | 2028   |
| chr1:53159156-53159664    | 509 | 13 | 4.85E-04 | 4.04 | RefSeq | ECHDC2     | 371    |
| chr8:125250934-125251439  | 506 | 14 | 4.85E-04 | 4.04 | ncRNA  | FER1L6-AS2 | 1506   |
| chr4:54788673-54789247    | 575 | 17 | 4.85E-04 | 4.04 | RefSeq | PDGFRA     | -774   |
| chr3:173488546-173489098  | 553 | 16 | 4.85E-04 | 4.04 | RefSeq | FNDC3B     | 247508 |
| chr5:176800864-176801496  | 633 | 18 | 4.85E-04 | 4.04 | RefSeq | GRK6       | 14571  |
| chr12:48221186-48221832   | 647 | 15 | 4.85E-04 | 4.04 | RefSeq | KCNH3      | 1979   |
| chr2:3720674-3721218      | 545 | 16 | 4.85E-04 | 4.04 | RefSeq | ALLC       | 37013  |
| chr10:133601353-133602069 | 717 | 21 | 4.85E-04 | 4.04 | RefSeq | PPP2R2D    | 3408   |
| chr8:17564747-17565162    | 416 | 12 | 4.85E-04 | 4.04 | RefSeq | MTUS1      | 137545 |
| chr3:157756232-157756728  | 497 | 14 | 4.93E-04 | 4.04 | RefSeq | SSR3       | -564   |
| chr1:42393011-42393457    | 447 | 13 | 4.93E-04 | 4.04 | RefSeq | GUCA2B     | 1332   |
| chr19:5792072-5792581     | 510 | 15 | 4.93E-04 | 4.04 | RefSeq | FUT6       | -1329  |
| chr1:115124422-115124978  | 557 | 15 | 4.93E-04 | 4.04 | RefSeq | SIKE1      | 0      |
| chr2:42874740-42875273    | 534 | 15 | 4.93E-04 | 4.04 | RefSeq | HAAO       | -1484  |
| chr8:86537708-86538216    | 509 | 15 | 4.93E-04 | 4.04 | RefSeq | CA3        | -92    |
| chr7:77165053-77165642    | 590 | 17 | 4.93E-04 | 4.04 | RefSeq | RSBN1L     | 1374   |
| chr9:93161853-93162571    | 719 | 20 | 4.93E-04 | 4.03 | RefSeq | AUH        | 1457   |



|                           |     |    |          |      |        |             |         |
|---------------------------|-----|----|----------|------|--------|-------------|---------|
| chrY:9958598-9959497      | 900 | 24 | 4.93E-04 | 4.03 | RefSeq | TSPY4       | 43988   |
| chr13:102515003-102515510 | 508 | 15 | 5.09E-04 | 4.03 | RefSeq | SLC10A2     | 1688    |
| chr6:138580215-138580753  | 539 | 14 | 5.09E-04 | 4.03 | RefSeq | KIAA1244    | 55469   |
| chr10:22672333-22672958   | 626 | 18 | 5.09E-04 | 4.03 | RefSeq | SPAG6       | -1422   |
| chr15:33626709-33627262   | 554 | 14 | 5.09E-04 | 4.03 | RefSeq | DPH6        | -1012   |
| chr5:34071598-34072206    | 609 | 17 | 5.09E-04 | 4.03 | RefSeq | C1QTNF3     | 6923    |
| chr6:27886132-27886664    | 533 | 15 | 5.09E-04 | 4.03 | RefSeq | HIST1H3H    | 311     |
| chr3:59934750-59935537    | 788 | 23 | 5.09E-04 | 4.03 | RefSeq | FHIT        | 1276637 |
| chr12:5023488-5024237     | 750 | 22 | 5.09E-04 | 4.03 | RefSeq | KCNA5       | 142     |
| chr16:4334038-4334616     | 579 | 16 | 5.09E-04 | 4.03 | RefSeq | CORO7-PAM16 | 72348   |
| chr11:65117483-65118334   | 852 | 20 | 5.09E-04 | 4.03 | RefSeq | KCNK7       | 1710    |
| chr9:6002721-6003432      | 712 | 20 | 5.09E-04 | 4.03 | RefSeq | RANBP6      | 2209    |
| chr15:20636683-20637176   | 494 | 15 | 5.09E-04 | 4.03 | RefSeq | NIPA1       | 1109    |
| chrX:64118109-64118687    | 579 | 12 | 5.09E-04 | 4.02 | RefSeq | ZC4H2       | 52663   |
| chr2:202273485-202274102  | 618 | 18 | 5.09E-04 | 4.02 | RefSeq | ALS2        | 80039   |
| chr1:143699541-143700210  | 670 | 16 | 5.17E-04 | 4.02 | RefSeq | PDE4DIP     | 6181    |
| chr9:137744827-137745334  | 508 | 14 | 5.17E-04 | 4.02 | RefSeq | KCNT1       | 10975   |
| chr17:36348005-36348515   | 511 | 13 | 5.25E-04 | 4.02 | RefSeq | KRT23       | -583    |
| chr3:145174164-145174690  | 527 | 15 | 5.25E-04 | 4.02 | RefSeq | C3orf58     | -167    |
| chr4:120432146-120432728  | 583 | 13 | 5.25E-04 | 4.02 | RefSeq | USP53       | 78916   |
| chr5:147142755-147143369  | 615 | 17 | 5.33E-04 | 4.02 | RefSeq | JAKMIP2     | -150    |
| chr12:127465730-127466252 | 523 | 15 | 5.33E-04 | 4.02 | RefSeq | TMEM132C    | 147829  |
| chrX:106047179-106047693  | 515 | 15 | 5.33E-04 | 4.02 | RefSeq | CLDN2       | 17129   |
| chr16:216235-216726       | 492 | 14 | 5.33E-04 | 4.02 | RefSeq | LUC7L       | 2725    |
| chr17:23932778-23933276   | 499 | 15 | 5.33E-04 | 4.02 | RefSeq | SPAG5       | 16908   |
| chr16:87443894-87444419   | 526 | 15 | 5.33E-04 | 4.02 | RefSeq | GALNS       | 6457    |
| chr1:66990317-66990800    | 484 | 14 | 5.33E-04 | 4.02 | RefSeq | TCTEX1D1    | 0       |
| chr11:47154987-47155532   | 546 | 15 | 5.33E-04 | 4.02 | RefSeq | ARFGAP2     | 0       |
| chr8:11186110-11186651    | 542 | 16 | 5.33E-04 | 4.02 | RefSeq | MTMR9       | 6700    |
| chr16:85099168-85099830   | 663 | 19 | 5.33E-04 | 4.02 | ncRNA  | FENDRR      | 138     |
| chr9:3884912-3885499      | 588 | 17 | 5.33E-04 | 4.02 | RefSeq | GLIS3       | 404537  |
| chr5:179152284-179152771  | 488 | 14 | 5.33E-04 | 4.02 | RefSeq | LTC4S       | -821    |
| chr22:30052917-30053502   | 586 | 17 | 5.33E-04 | 4.02 | RefSeq | PATZ1       | 18748   |
| chr12:104249213-104249790 | 578 | 15 | 5.33E-04 | 4.02 | RefSeq | C12orf75    | 669     |
| chr8:87311339-87311853    | 515 | 14 | 5.33E-04 | 4.02 | RefSeq | SLC7A13     | 0       |
| chr19:55070824-55071322   | 499 | 14 | 5.33E-04 | 4.02 | RefSeq | AKT1S1      | 1135    |
| chr8:67253002-67253504    | 503 | 12 | 5.33E-04 | 4.02 | RefSeq | CRH         | 0       |
| chr11:13438141-13438759   | 619 | 18 | 5.33E-04 | 4.01 | RefSeq | BTBD10      | 2662    |
| chr14:63744645-63745136   | 492 | 14 | 5.33E-04 | 4.01 | RefSeq | SYNE2       | 355209  |

Online supplements are not copyedited prior to posting and the author(s) take full responsibility for the accuracy of all data.



|                           |      |    |          |      |        |              |        |
|---------------------------|------|----|----------|------|--------|--------------|--------|
| chr5:96051284-96051669    | 386  | 11 | 5.33E-04 | 4.01 | RefSeq | CAST         | 27667  |
| chr9:14310640-14311142    | 503  | 14 | 5.33E-04 | 4.01 | RefSeq | NFIB         | 77841  |
| chr1:2981151-2981672      | 522  | 15 | 5.33E-04 | 4.01 | RefSeq | PRDM16       | 5549   |
| chr13:34955033-34955639   | 607  | 18 | 5.33E-04 | 4.01 | RefSeq | NBEA         | 6147   |
| chr18:8706170-8706706     | 537  | 15 | 5.33E-04 | 4.01 | RefSeq | MTCL1        | -663   |
| chr4:2785482-2786107      | 626  | 17 | 5.33E-04 | 4.01 | RefSeq | SH3BP2       | 20934  |
| chr1:143708821-143709307  | 487  | 14 | 5.33E-04 | 4.01 | RefSeq | PDE4DIP      | -352   |
| chr7:141013875-141014435  | 561  | 17 | 5.33E-04 | 4.01 | RefSeq | KIAA1147     | 33988  |
| chr2:180160155-180160725  | 571  | 16 | 5.33E-04 | 4.01 | RefSeq | ZNF385B      | 158290 |
| chr6:29120362-29120949    | 588  | 17 | 5.33E-04 | 4.01 | RefSeq | OR2W1        | 0      |
| chr8:57282878-57283394    | 517  | 15 | 5.33E-04 | 4.01 | RefSeq | PLAG1        | 3020   |
| chr18:59965509-59966000   | 492  | 14 | 5.33E-04 | 4.01 | ncRNA  | LINC00305    | 1241   |
| chr16:4488844-4489253     | 410  | 12 | 5.33E-04 | 4.01 | RefSeq | HMOX2        | 22502  |
| chr1:110829645-110830172  | 528  | 15 | 5.33E-04 | 4.01 | ncRNA  | CYMP         | 4734   |
| chr3:102048858-102049347  | 490  | 14 | 5.33E-04 | 4.01 | RefSeq | ABI3BP       | 145678 |
| chr6:99904255-99904750    | 496  | 13 | 5.33E-04 | 4.01 | RefSeq | FAXC         | -2     |
| chr6:65677902-65678411    | 510  | 14 | 5.33E-04 | 4.01 | RefSeq | EYS          | 795429 |
| chr15:31326240-31326772   | 533  | 15 | 5.33E-04 | 4.01 | ncRNA  | TMC05B       | 277    |
| chr10:95505728-95506264   | 537  | 15 | 5.41E-04 | 4.01 | RefSeq | LGI1         | -1292  |
| chr1:218769421-218770104  | 684  | 19 | 5.41E-04 | 4    | RefSeq | MARK1        | 1273   |
| chr11:3199346-3199917     | 572  | 17 | 5.41E-04 | 4    | ncRNA  | MRGPRG-AS1   | 3208   |
| chr20:15786892-15787372   | 481  | 14 | 5.41E-04 | 4    | RefSeq | MACROD2      | 661388 |
| chr1:210673606-210674174  | 569  | 14 | 5.41E-04 | 4    | RefSeq | NENF         | 754    |
| chr8:19839014-19839547    | 534  | 15 | 5.41E-04 | 4    | RefSeq | LPL          | -1315  |
| chr18:55718259-55718935   | 677  | 18 | 5.41E-04 | 4    | RefSeq | PMAIP1       | 87     |
| chr7:89712014-89712712    | 699  | 19 | 5.41E-04 | 4    | RefSeq | CFAP69       | 0      |
| chr6:2121367-2121873      | 507  | 11 | 5.41E-04 | 4    | RefSeq | GMDS         | -142   |
| chr6:111910063-111910690  | 628  | 16 | 5.41E-04 | 4    | RefSeq | REV3L        | 922    |
| chr1:19105221-19105709    | 489  | 14 | 5.49E-04 | 4    | RefSeq | IFFO2        | 49705  |
| chr5:59228223-59228713    | 491  | 14 | 5.49E-04 | 4    | RefSeq | PDE4D        | 590970 |
| chr12:94777043-94777789   | 747  | 22 | 5.49E-04 | 4    | RefSeq | SNRPF        | 203    |
| chr10:102726979-102727475 | 497  | 14 | 5.49E-04 | 4    | RefSeq | SEMA4G       | 4703   |
| chr12:120724462-120724974 | 513  | 14 | 5.49E-04 | 4    | ncRNA  | LINC01089    | 800    |
| chr15:65331340-65331816   | 477  | 14 | 5.49E-04 | 4    | RefSeq | AAGAB        | 2775   |
| chr1:115012116-115012649  | 534  | 15 | 5.49E-04 | 4    | RefSeq | DENND2C      | 1607   |
| chr11:71501658-71502156   | 499  | 14 | 5.57E-04 | 4    | RefSeq | ANAPC15      | -187   |
| chr5:174355246-174355754  | 509  | 15 | 5.57E-04 | 4    | ncRNA  | FLJ16171     | 0      |
| chr1:16215629-16216260    | 632  | 17 | 5.74E-04 | 4    | RefSeq | HSPB7        | 1613   |
| chr12:45201641-45202652   | 1012 | 29 | 5.74E-04 | 4    | ncRNA  | LOC100288798 | 137915 |



|                          |     |    |          |      |        |         |        |
|--------------------------|-----|----|----------|------|--------|---------|--------|
| chr11:59804665-59805155  | 491 | 15 | 5.74E-04 | 3.99 | RefSeq | MS4A4A  | 75     |
| chr3:166276538-166277034 | 497 | 10 | 5.74E-04 | 3.99 | RefSeq | SI      | 1944   |
| chr15:38436921-38437412  | 492 | 11 | 5.82E-04 | 3.99 | RefSeq | DISP2   | -314   |
| chr17:40367934-40368520  | 587 | 17 | 5.90E-04 | 3.99 | RefSeq | KIF18B  | 12086  |
| chr11:64173467-64173959  | 493 | 13 | 5.98E-04 | 3.99 | RefSeq | NRXN2   | 73278  |
| chr3:48450838-48451349   | 512 | 15 | 5.98E-04 | 3.99 | RefSeq | CCDC51  | 5185   |
| chr12:51623450-51624142  | 693 | 15 | 6.06E-04 | 3.99 | RefSeq | KRT8    | 5776   |
| chr15:41697781-41698278  | 498 | 13 | 6.06E-04 | 3.99 | RefSeq | STRC    | 13     |
| chrX:17304279-17304793   | 515 | 15 | 6.06E-04 | 3.99 | RefSeq | NHS     | 815    |
| chr3:1110163-1110663     | 501 | 14 | 6.06E-04 | 3.99 | RefSeq | CNTN6   | 821    |
| chr2:178887579-178888155 | 577 | 12 | 6.06E-04 | 3.98 | RefSeq | OSBPL6  | 120125 |
| chr12:45044063-45044737  | 675 | 18 | 6.06E-04 | 3.98 | RefSeq | SLC38A2 | 8176   |
| chr1:26510988-26511319   | 332 | 10 | 6.06E-04 | 3.98 | RefSeq | UBXN11  | 6025   |
| chr19:56209692-56210192  | 501 | 15 | 6.06E-04 | 3.98 | RefSeq | KLK10   | 5052   |
| chr16:74894829-74895351  | 523 | 14 | 6.06E-04 | 3.98 | RefSeq | CNTNAP4 | 26152  |
| chr4:55908716-55909303   | 588 | 17 | 6.14E-04 | 3.98 | RefSeq | SRD5A3  | 1571   |
| chrX:41340695-41341177   | 483 | 14 | 6.14E-04 | 3.98 | RefSeq | CASK    | 326055 |
| chr6:35853334-35853672   | 339 | 10 | 6.14E-04 | 3.98 | RefSeq | CLPSL2  | 985    |
| chr7:141125605-141126118 | 514 | 15 | 6.22E-04 | 3.98 | RefSeq | TAS2R4  | 847    |
| chr3:187563234-187563771 | 538 | 15 | 6.38E-04 | 3.98 | RefSeq | DGKG    | -516   |
| chr4:109764317-109764650 | 334 | 10 | 6.38E-04 | 3.97 | RefSeq | RPL34   | 3146   |
| chr17:30499348-30499734  | 387 | 12 | 6.38E-04 | 3.97 | RefSeq | UNC45B  | 399    |
| chr17:72787498-72788081  | 584 | 17 | 6.38E-04 | 3.97 | RefSeq | 42256   | -1006  |
| chr16:14631250-14631794  | 545 | 13 | 6.38E-04 | 3.97 | RefSeq | PARN    | 0      |
| chr3:15444359-15444853   | 495 | 13 | 6.38E-04 | 3.97 | RefSeq | METTL6  | -300   |
| chr6:31024865-31025597   | 733 | 20 | 6.38E-04 | 3.97 | RefSeq | DPCR1   | 8109   |
| chr6:108198999-108199525 | 527 | 15 | 6.38E-04 | 3.97 | RefSeq | SCML4   | 52690  |
| chr22:20171969-20172506  | 538 | 16 | 6.46E-04 | 3.97 | ncRNA  | PI4KAP2 | 29275  |
| chr14:74418347-74418841  | 495 | 11 | 6.46E-04 | 3.97 | RefSeq | DLST    | 0      |
| chr9:124731890-124732403 | 514 | 14 | 6.46E-04 | 3.96 | RefSeq | ZBTB26  | 1198   |
| chr4:82342904-82343420   | 517 | 15 | 6.46E-04 | 3.96 | RefSeq | PRKG2   | 11876  |
| chr19:14390838-14391370  | 533 | 15 | 6.54E-04 | 3.96 | RefSeq | DDX39A  | 0      |
| chr18:27153186-27153705  | 520 | 15 | 6.54E-04 | 3.96 | RefSeq | DSG1    | 1136   |
| chr5:37238305-37238648   | 344 | 10 | 6.54E-04 | 3.96 | RefSeq | C5orf42 | 46640  |
| chr15:76173777-76174288  | 512 | 14 | 6.54E-04 | 3.96 | RefSeq | SH2D7   | 1795   |
| chr4:123594655-123595129 | 475 | 11 | 6.54E-04 | 3.96 | RefSeq | IL2     | 1972   |
| chr1:204709637-204710154 | 518 | 16 | 6.54E-04 | 3.96 | RefSeq | IKBKE   | -55    |
| chr16:3110340-3110858    | 519 | 15 | 6.54E-04 | 3.96 | RefSeq | ZNF205  | 7776   |
| chr2:111206459-111206971 | 513 | 12 | 6.54E-04 | 3.95 | RefSeq | ACOXL   | 0      |

Online supplements are not copyedited prior to posting and the author(s) take full responsibility for the accuracy of all data.



|                           |     |    |          |      |        |           |        |
|---------------------------|-----|----|----------|------|--------|-----------|--------|
| chr19:42882134-42882633   | 500 | 14 | 6.62E-04 | 3.95 | RefSeq | ZNF607    | 19297  |
| chr6:149726617-149727135  | 519 | 15 | 6.79E-04 | 3.95 | RefSeq | TAB2      | 45861  |
| chr16:88082991-88083502   | 512 | 13 | 6.87E-04 | 3.95 | RefSeq | ANKRD11   | 969    |
| chr17:59126069-59126575   | 507 | 14 | 6.95E-04 | 3.95 | RefSeq | MAP3K3    | 72536  |
| chr17:46296333-46296951   | 619 | 17 | 6.95E-04 | 3.95 | RefSeq | TOB1      | 3388   |
| chr20:62264386-62264946   | 561 | 16 | 6.95E-04 | 3.95 | RefSeq | MYT1      | -1325  |
| chr14:57833435-57833923   | 489 | 14 | 6.95E-04 | 3.95 | RefSeq | ARID4A    | -1052  |
| chr16:65844233-65844601   | 369 | 11 | 7.03E-04 | 3.95 | RefSeq | SLC9A5    | 3877   |
| chr10:59696444-59696942   | 499 | 14 | 7.11E-04 | 3.94 | RefSeq | IPMK      | 759    |
| chr7:127737908-127738398  | 491 | 14 | 7.19E-04 | 3.94 | RefSeq | RBM28     | 32801  |
| chr1:160304829-160305314  | 486 | 14 | 7.19E-04 | 3.94 | RefSeq | NOS1AP    | -891   |
| chr3:48646920-48647425    | 506 | 14 | 7.19E-04 | 3.94 | RefSeq | SLC26A6   | -636   |
| chr7:66097212-66097710    | 499 | 14 | 7.19E-04 | 3.94 | RefSeq | SBDS      | 314    |
| chr3:115496626-115497131  | 506 | 15 | 7.19E-04 | 3.94 | RefSeq | TIGIT     | 1103   |
| chr12:21381527-21382039   | 513 | 15 | 7.19E-04 | 3.94 | RefSeq | SLCO1A2   | 57600  |
| chr15:72393140-72393655   | 516 | 15 | 7.27E-04 | 3.94 | RefSeq | CCDC33    | 77457  |
| chr1:114952649-114953174  | 526 | 15 | 7.27E-04 | 3.94 | RefSeq | DENND2C   | 61082  |
| chr2:53848786-53849273    | 488 | 14 | 7.35E-04 | 3.94 | RefSeq | CHAC2     | 353    |
| chr19:35553375-35553896   | 522 | 15 | 7.35E-04 | 3.93 | RefSeq | ZNF536    | -1272  |
| chr7:94375444-94375956    | 513 | 14 | 7.35E-04 | 3.93 | RefSeq | PPP1R9A   | 559    |
| chr11:111541865-111542384 | 520 | 14 | 7.35E-04 | 3.93 | RefSeq | TEX12     | -921   |
| chr20:33048977-33049494   | 518 | 15 | 7.35E-04 | 3.93 | RefSeq | MYH7B     | 41678  |
| chr1:150902491-150903021  | 531 | 11 | 7.35E-04 | 3.93 | RefSeq | LCE2D     | 0      |
| chr17:33706859-33707285   | 427 | 13 | 7.43E-04 | 3.93 | RefSeq | MRPL45    | 351    |
| chr21:41800567-41801073   | 507 | 14 | 7.51E-04 | 3.93 | RefSeq | TMPRSS2   | 790    |
| chr17:51157570-51158125   | 556 | 14 | 7.51E-04 | 3.93 | RefSeq | TMEM100   | 6357   |
| chr5:32822888-32823398    | 511 | 14 | 7.51E-04 | 3.93 | RefSeq | NPR3      | 75693  |
| chr6:64088492-64089063    | 572 | 16 | 7.51E-04 | 3.93 | RefSeq | LGSN      | -650   |
| chr13:102290206-102290698 | 493 | 15 | 7.51E-04 | 3.93 | RefSeq | BIVM      | 40806  |
| chr10:105100633-105101148 | 516 | 14 | 7.51E-04 | 3.93 | RefSeq | PCGF6     | 0      |
| chr4:141294037-141294528  | 492 | 12 | 7.51E-04 | 3.93 | RefSeq | MAML3     | 156    |
| chr2:101978739-101979301  | 563 | 16 | 7.59E-04 | 3.92 | RefSeq | IL1R2     | 4001   |
| chrX:72138062-72138616    | 555 | 16 | 7.59E-04 | 3.92 | RefSeq | PABPC1L2B | -1461  |
| chr6:71722097-71722594    | 498 | 14 | 7.59E-04 | 3.92 | RefSeq | B3GAT2    | 916    |
| chr1:155051809-155052299  | 491 | 14 | 7.59E-04 | 3.92 | RefSeq | NTRK1     | 0      |
| chr5:34955571-34956075    | 505 | 15 | 7.59E-04 | 3.92 | RefSeq | BRIX1     | 3994   |
| chr3:25681149-25681694    | 546 | 15 | 7.59E-04 | 3.92 | RefSeq | TOP2B     | -281   |
| chr3:152405679-152406076  | 398 | 11 | 7.59E-04 | 3.92 | RefSeq | MED12L    | 118404 |
| chr1:205143429-205143936  | 508 | 14 | 7.59E-04 | 3.92 | RefSeq | FAIM3     | 18066  |

Online supplements are not copyedited prior to posting and the author(s) take full responsibility for the accuracy of all data.



|                          |     |    |          |      |        |              |        |
|--------------------------|-----|----|----------|------|--------|--------------|--------|
| chr1:85818864-85819351   | 488 | 14 | 7.59E-04 | 3.92 | RefSeq | CYR61        | 0      |
| chr10:72214983-72215475  | 493 | 14 | 7.59E-04 | 3.92 | RefSeq | TBATA        | 0      |
| chr6:167972629-167973131 | 503 | 15 | 7.59E-04 | 3.92 | RefSeq | MLLT4        | 2109   |
| chr6:159573201-159573692 | 492 | 14 | 7.59E-04 | 3.92 | RefSeq | FNDC1        | 62784  |
| chr6:90328921-90329449   | 529 | 15 | 7.59E-04 | 3.92 | RefSeq | ANKRD6       | 129305 |
| chr17:24643832-24644348  | 517 | 12 | 7.59E-04 | 3.92 | RefSeq | NUFIP2       | 945    |
| chr2:155265351-155265873 | 523 | 15 | 7.59E-04 | 3.92 | RefSeq | KCNJ3        | 2012   |
| chr1:170682514-170683073 | 560 | 16 | 7.59E-04 | 3.92 | RefSeq | C1orf105     | 26063  |
| chr2:160977236-160977744 | 509 | 14 | 7.59E-04 | 3.92 | RefSeq | RBMS1        | 80821  |
| chr14:93850246-93850746  | 501 | 14 | 7.59E-04 | 3.92 | RefSeq | SERPINA6     | 8696   |
| chr9:40763987-40764486   | 500 | 14 | 7.59E-04 | 3.92 | RefSeq | ZNF658       | 17627  |
| chr2:148497427-148497943 | 517 | 14 | 7.59E-04 | 3.91 | RefSeq | MBD5         | 2377   |
| chr10:74985089-74985595  | 507 | 15 | 7.59E-04 | 3.91 | RefSeq | USP54        | 19845  |
| chr14:70442167-70442674  | 508 | 12 | 7.67E-04 | 3.91 | RefSeq | PCNX         | -1201  |
| chr4:113287630-113288161 | 532 | 15 | 7.67E-04 | 3.91 | RefSeq | C4orf32      | 1628   |
| chr4:48183571-48184066   | 496 | 14 | 7.67E-04 | 3.91 | RefSeq | SLC10A4      | 3454   |
| chr19:41121027-41121583  | 557 | 16 | 7.67E-04 | 3.91 | RefSeq | LRFN3        | 1165   |
| chr20:58062925-58063398  | 474 | 12 | 7.67E-04 | 3.91 | RefSeq | C20orf197    | -977   |
| chr14:20095080-20095617  | 538 | 11 | 7.67E-04 | 3.91 | RefSeq | RNASE9       | 3314   |
| chr19:51498004-51498824  | 821 | 19 | 7.76E-04 | 3.91 | RefSeq | HIF3A        | 4531   |
| chr21:44124697-44125213  | 517 | 15 | 7.76E-04 | 3.91 | RefSeq | AGPAT3       | 15153  |
| chr11:55318455-55318995  | 541 | 15 | 7.84E-04 | 3.91 | RefSeq | OR5D14       | -613   |
| chr17:65679273-65679765  | 493 | 14 | 7.92E-04 | 3.91 | RefSeq | KCNJ2        | 2002   |
| chr1:15130943-15131294   | 352 | 10 | 8.00E-04 | 3.91 | RefSeq | KAZN         | 7731   |
| chr1:8308508-8308905     | 398 | 12 | 8.00E-04 | 3.91 | RefSeq | SLC45A1      | 7776   |
| chr14:49135747-49136142  | 396 | 11 | 8.00E-04 | 3.91 | RefSeq | LRR1         | 582    |
| chr14:22684708-22685197  | 490 | 14 | 8.00E-04 | 3.91 | RefSeq | SLC7A8       | 9311   |
| chr4:87734175-87734842   | 668 | 19 | 8.08E-04 | 3.91 | RefSeq | PTPN13       | 0      |
| chr2:165185615-165186132 | 518 | 15 | 8.16E-04 | 3.91 | RefSeq | GRB14        | 475    |
| chr3:129777902-129778416 | 515 | 11 | 8.16E-04 | 3.91 | ncRNA  | C3orf27      | -282   |
| chr2:72996185-72996699   | 515 | 14 | 8.16E-04 | 3.9  | RefSeq | EMX1         | -1413  |
| chr7:143581543-143582090 | 548 | 15 | 8.16E-04 | 3.9  | ncRNA  | LOC101928605 | 58196  |
| chr12:62347189-62347698  | 510 | 15 | 8.16E-04 | 3.9  | RefSeq | DPY19L2      | 924    |
| chr1:1017255-1017759     | 505 | 15 | 8.16E-04 | 3.9  | RefSeq | C1orf159     | 23841  |
| chr11:61006128-61006636  | 509 | 15 | 8.16E-04 | 3.9  | RefSeq | PPP1R32      | 967    |
| chrX:6156368-6156933     | 566 | 16 | 8.16E-04 | 3.9  | RefSeq | NLGN4X       | 0      |
| chr18:69964365-69964904  | 540 | 15 | 8.16E-04 | 3.9  | RefSeq | FBXO15       | 1177   |
| chr4:115045570-115046083 | 514 | 14 | 8.16E-04 | 3.9  | RefSeq | ARSJ         | 74245  |
| chr22:34965592-34966081  | 490 | 11 | 8.32E-04 | 3.9  | RefSeq | APOL2        | 0      |

Online supplements are not copyedited prior to posting and the author(s) take full responsibility for the accuracy of all data.

|                           |     |    |          |      |        |              |        |
|---------------------------|-----|----|----------|------|--------|--------------|--------|
| chr19:47073610-47074115   | 506 | 13 | 8.32E-04 | 3.9  | RefSeq | CD79A        | 580    |
| chr6:75970437-75970923    | 487 | 14 | 8.32E-04 | 3.9  | RefSeq | COL12A1      | 1421   |
| chr17:21257637-21258077   | 441 | 13 | 8.32E-04 | 3.9  | RefSeq | KCNJ18       | 8596   |
| chr17:38185408-38185898   | 491 | 14 | 8.32E-04 | 3.89 | RefSeq | WNK4         | -277   |
| chr5:140281679-140282496  | 818 | 22 | 8.32E-04 | 3.89 | RefSeq | PCDHA1       | 135774 |
| chr1:234371274-234371814  | 541 | 15 | 8.40E-04 | 3.89 | RefSeq | GPR137B      | -641   |
| chr2:211124122-211124631  | 510 | 15 | 8.40E-04 | 3.89 | RefSeq | CPS1         | 73471  |
| chr1:145481293-145481821  | 529 | 15 | 8.40E-04 | 3.89 | RefSeq | BCL9         | 1398   |
| chr19:7651476-7651964     | 489 | 13 | 8.56E-04 | 3.89 | RefSeq | TRAPPC5      | 0      |
| chr3:49138017-49138532    | 516 | 15 | 8.56E-04 | 3.89 | RefSeq | LAMB2        | 7072   |
| chr1:93578538-93579028    | 491 | 14 | 8.56E-04 | 3.89 | ncRNA  | LOC100131564 | 4929   |
| chr16:63601447-63601935   | 489 | 14 | 8.56E-04 | 3.89 | RefSeq | CDH11        | 111486 |
| chr19:2187563-2188105     | 543 | 16 | 8.56E-04 | 3.89 | RefSeq | PLEKHJ1      | -210   |
| chr3:127683701-127684257  | 557 | 16 | 8.56E-04 | 3.89 | RefSeq | UROC1        | 35050  |
| chr11:193868-194369       | 502 | 15 | 8.56E-04 | 3.89 | RefSeq | BET1L        | 3054   |
| chr2:178643902-178644391  | 490 | 14 | 8.56E-04 | 3.89 | RefSeq | PDE11A       | 36922  |
| chr15:42616163-42616670   | 508 | 13 | 8.56E-04 | 3.89 | RefSeq | EIF3J        | 0      |
| chrX:53580353-53580847    | 495 | 14 | 8.56E-04 | 3.89 | RefSeq | HUWE1        | 149553 |
| chr4:9392797-9393296      | 500 | 14 | 8.56E-04 | 3.89 | RefSeq | DRD5         | 441    |
| chr11:67133360-67133925   | 566 | 16 | 8.64E-04 | 3.89 | RefSeq | NDUFV1       | 2461   |
| chr2:174820613-174821130  | 518 | 14 | 8.64E-04 | 3.89 | RefSeq | OLA1         | 482    |
| chr6:31789251-31789731    | 481 | 13 | 8.64E-04 | 3.89 | RefSeq | LY6G6D       | -1381  |
| chr12:7234299-7234800     | 502 | 13 | 8.64E-04 | 3.89 | RefSeq | PEX5         | 74     |
| chr11:47473889-47474397   | 509 | 14 | 8.64E-04 | 3.89 | RefSeq | CELF1        | 27720  |
| chr16:30916660-30917179   | 520 | 15 | 8.64E-04 | 3.88 | RefSeq | STX1B        | 12152  |
| chr12:94709025-94709534   | 510 | 15 | 8.64E-04 | 3.88 | RefSeq | NTN4         | -357   |
| chr9:111559-112108        | 550 | 15 | 8.64E-04 | 3.88 | RefSeq | CBWD1        | 56968  |
| chr5:149345398-149345917  | 520 | 15 | 8.64E-04 | 3.88 | RefSeq | SLC26A2      | 24905  |
| chr22:22529542-22530313   | 772 | 21 | 8.64E-04 | 3.88 | RefSeq | SLC2A11      | 652    |
| chr11:111604028-111604635 | 608 | 17 | 8.64E-04 | 3.88 | RefSeq | PTS          | 1730   |
| chr22:36533025-36533570   | 546 | 14 | 8.64E-04 | 3.88 | RefSeq | GCAT         | -288   |
| chr2:160277672-160278187  | 516 | 14 | 8.64E-04 | 3.88 | RefSeq | 42070        | 458    |
| chr1:54642116-54642615    | 500 | 14 | 8.64E-04 | 3.88 | RefSeq | SSBP3        | 2042   |
| chr16:29738772-29739280   | 509 | 14 | 8.64E-04 | 3.88 | RefSeq | MVP          | 0      |
| chr11:9067379-9067858     | 480 | 13 | 8.64E-04 | 3.88 | RefSeq | SCUBE2       | 1869   |
| chr1:205105202-205105695  | 494 | 14 | 8.64E-04 | 3.88 | RefSeq | IL20         | -82    |
| chr1:176330522-176331016  | 495 | 14 | 8.64E-04 | 3.88 | RefSeq | RASAL2       | 1035   |
| chr2:232497302-232497790  | 489 | 14 | 8.64E-04 | 3.88 | RefSeq | NPPC         | 1493   |
| chr1:6502137-6502737      | 601 | 17 | 8.64E-04 | 3.88 | RefSeq | PLEKHG5      | 0      |



|                           |     |    |          |      |        |              |        |
|---------------------------|-----|----|----------|------|--------|--------------|--------|
| chr15:64370982-64371463   | 482 | 14 | 8.64E-04 | 3.88 | RefSeq | DIS3L        | -1224  |
| chr7:91703882-91704225    | 344 | 10 | 8.72E-04 | 3.88 | RefSeq | KRIT1        | 8940   |
| chr7:93041425-93041968    | 544 | 16 | 8.72E-04 | 3.88 | RefSeq | CALCR        | 11     |
| chr5:137534620-137535137  | 518 | 15 | 8.81E-04 | 3.87 | RefSeq | BRD8         | 7121   |
| chr18:46598683-46599116   | 434 | 12 | 8.89E-04 | 3.87 | RefSeq | MRO          | 6637   |
| chr5:149771301-149771681  | 381 | 10 | 8.89E-04 | 3.87 | RefSeq | CD74         | 1012   |
| chr5:38630890-38631376    | 487 | 14 | 8.89E-04 | 3.87 | RefSeq | LIFR         | 0      |
| chrX:106964191-106964666  | 476 | 14 | 8.89E-04 | 3.87 | RefSeq | MID2         | 8451   |
| chr14:67253535-67254041   | 507 | 10 | 8.89E-04 | 3.87 | RefSeq | RDH12        | 15179  |
| chr7:142885066-142885588  | 523 | 15 | 8.89E-04 | 3.87 | RefSeq | TAS2R41      | 0      |
| chr18:3438403-3438903     | 501 | 14 | 8.89E-04 | 3.87 | RefSeq | TGIF1        | -508   |
| chr3:150856235-150856746  | 512 | 14 | 8.89E-04 | 3.87 | RefSeq | WWTR1        | 47005  |
| chr6:97352540-97353100    | 561 | 15 | 8.89E-04 | 3.87 | RefSeq | GPR63        | 38975  |
| chr7:21549101-21549833    | 733 | 20 | 8.89E-04 | 3.87 | RefSeq | DNAH11       | 0      |
| chr11:133319933-133320424 | 492 | 15 | 8.97E-04 | 3.87 | RefSeq | IGSF9B       | 11436  |
| chr11:386148-386650       | 503 | 15 | 8.97E-04 | 3.87 | RefSeq | PKP3         | 1931   |
| chr9:14187941-14188455    | 515 | 16 | 8.97E-04 | 3.87 | RefSeq | NFIB         | 115591 |
| chr16:1522502-1523000     | 499 | 14 | 8.97E-04 | 3.87 | RefSeq | TMEM204      | 3759   |
| chr3:110153051-110153570  | 520 | 15 | 8.97E-04 | 3.87 | RefSeq | GUCA1C       | 1798   |
| chr13:43908340-43908843   | 504 | 14 | 8.97E-04 | 3.87 | RefSeq | TSC22D1      | 548    |
| chr11:6999867-7000520     | 654 | 15 | 8.97E-04 | 3.87 | RefSeq | NLRP14       | 1591   |
| chrX:40393985-40394512    | 528 | 14 | 8.97E-04 | 3.87 | RefSeq | MED14        | 85237  |
| chrX:53586837-53587354    | 518 | 15 | 8.97E-04 | 3.87 | RefSeq | HUWE1        | 143046 |
| chr1:144291496-144291831  | 336 | 10 | 8.97E-04 | 3.87 | RefSeq | PIAS3        | 4151   |
| chr1:151280226-151280732  | 507 | 14 | 8.97E-04 | 3.87 | RefSeq | SPRR2D       | -7     |
| chr7:149195545-149196058  | 514 | 15 | 8.97E-04 | 3.87 | ncRNA  | ATP6V0E2-AS1 | 5827   |
| chr1:2312574-2313069      | 496 | 14 | 8.97E-04 | 3.87 | RefSeq | MORN1        | 0      |
| chr2:96873743-96874241    | 499 | 15 | 8.97E-04 | 3.86 | RefSeq | ANKRD23      | -257   |
| chr12:50912549-50913051   | 503 | 14 | 8.97E-04 | 3.86 | RefSeq | KRT7         | -170   |
| chr6:116956402-116956898  | 497 | 14 | 8.97E-04 | 3.86 | RefSeq | TRAPPC3L     | 16569  |
| chr12:25600974-25601458   | 485 | 14 | 8.97E-04 | 3.86 | RefSeq | LMNTD1       | 91306  |
| chr8:31616162-31616651    | 490 | 14 | 8.97E-04 | 3.86 | RefSeq | NRG1         | -159   |
| chr5:172025260-172025763  | 504 | 15 | 8.97E-04 | 3.86 | RefSeq | NEURL1B      | 24379  |
| chr6:47956295-47956957    | 663 | 19 | 8.97E-04 | 3.86 | RefSeq | PTCHD4       | 187428 |
| chr7:96471707-96472271    | 565 | 16 | 8.97E-04 | 3.86 | RefSeq | DLX6         | -955   |
| chr5:108112094-108112696  | 603 | 16 | 8.97E-04 | 3.86 | RefSeq | FER          | 672    |
| chr2:108432367-108432901  | 535 | 15 | 8.97E-04 | 3.86 | RefSeq | GCC2         | 358    |
| chr18:2836389-2836874     | 486 | 14 | 8.97E-04 | 3.86 | RefSeq | EMILIN2      | -154   |
| chr15:19335082-19335586   | 505 | 15 | 8.97E-04 | 3.86 | RefSeq | POTEB2       | 748    |

Online supplements are not copyedited prior to posting and the author(s) take full responsibility for the accuracy of all data.



|                           |     |    |          |      |        |              |        |
|---------------------------|-----|----|----------|------|--------|--------------|--------|
| chr1:39565935-39566433    | 499 | 15 | 8.97E-04 | 3.86 | RefSeq | MACF1        | 243509 |
| chr17:370607-371098       | 492 | 14 | 8.97E-04 | 3.86 | RefSeq | VPS53        | 193749 |
| chrX:148428203-148428711  | 509 | 15 | 8.97E-04 | 3.86 | ncRNA  | LINC00893    | 493    |
| chr1:199444904-199445555  | 652 | 18 | 8.97E-04 | 3.86 | RefSeq | IGFN1        | 18328  |
| chr2:229843261-229843754  | 494 | 13 | 8.97E-04 | 3.86 | RefSeq | PID1         | 548    |
| chr14:69428506-69428976   | 471 | 13 | 8.97E-04 | 3.86 | RefSeq | SMOC1        | 12639  |
| chr17:36646583-36647133   | 551 | 16 | 8.97E-04 | 3.86 | RefSeq | KRTAP9-8     | -663   |
| chr3:155422330-155422841  | 512 | 10 | 8.97E-04 | 3.85 | RefSeq | ARHGEF26     | 100848 |
| chrX:33137168-33137663    | 496 | 13 | 8.97E-04 | 3.85 | RefSeq | DMD          | 129985 |
| chr1:58931446-58932073    | 628 | 18 | 9.05E-04 | 3.85 | RefSeq | MYSM1        | 6263   |
| chr19:54670343-54670844   | 502 | 14 | 9.05E-04 | 3.85 | RefSeq | FLT3LG       | 1065   |
| chr20:35589429-35589919   | 491 | 12 | 9.05E-04 | 3.85 | RefSeq | BLCAP        | 0      |
| chr15:87945600-87945987   | 388 | 11 | 9.05E-04 | 3.85 | RefSeq | TICRR        | 25778  |
| chr2:104831467-104831979  | 513 | 15 | 9.05E-04 | 3.85 | ncRNA  | LINC01158    | 2388   |
| chr12:11231693-11232179   | 487 | 14 | 9.05E-04 | 3.85 | RefSeq | TAS2R42      | -882   |
| chr7:122091532-122092026  | 495 | 14 | 9.05E-04 | 3.85 | RefSeq | CADPS2       | 222024 |
| chr4:153550616-153551097  | 482 | 14 | 9.05E-04 | 3.85 | RefSeq | FBXW7        | 124539 |
| chr1:43596750-43597242    | 493 | 13 | 9.05E-04 | 3.85 | RefSeq | CDC20        | 0      |
| chr17:77584054-77584529   | 476 | 13 | 9.05E-04 | 3.85 | RefSeq | RAC3         | 1233   |
| chr1:103840890-103841396  | 507 | 14 | 9.05E-04 | 3.85 | RefSeq | LOC101928436 | -196   |
| chr20:31723001-31723392   | 392 | 12 | 9.05E-04 | 3.84 | RefSeq | NECAB3       | 2534   |
| chr11:1559805-1560304     | 500 | 14 | 9.05E-04 | 3.84 | ncRNA  | KRTAP5-AS1   | 9258   |
| chr13:44936801-44937297   | 497 | 13 | 9.05E-04 | 3.84 | RefSeq | COG3         | 0      |
| chr21:37707362-37707881   | 520 | 11 | 9.05E-04 | 3.84 | RefSeq | DYRK1A       | 45633  |
| chr6:32246807-32247323    | 517 | 14 | 9.13E-04 | 3.84 | RefSeq | AGPAT1       | 4572   |
| chr7:93470065-93470583    | 519 | 15 | 9.21E-04 | 3.84 | RefSeq | BET1         | 1044   |
| chr10:12275121-12275639   | 519 | 15 | 9.29E-04 | 3.84 | RefSeq | NUDT5        | 2511   |
| chr9:127714252-127714765  | 514 | 15 | 9.37E-04 | 3.84 | RefSeq | PBX3         | 163953 |
| chr17:61492878-61493397   | 520 | 13 | 9.37E-04 | 3.84 | RefSeq | CEP112       | 125278 |
| chr11:93772509-93773024   | 516 | 15 | 9.37E-04 | 3.84 | RefSeq | GPR83        | 1210   |
| chr7:153375798-153376311  | 514 | 14 | 9.37E-04 | 3.84 | RefSeq | DPP6         | 160683 |
| chr15:20256205-20256719   | 515 | 15 | 9.45E-04 | 3.84 | ncRNA  | GOLGA8DP     | 10374  |
| chr17:77609056-77609570   | 515 | 15 | 9.45E-04 | 3.83 | RefSeq | DUS1L        | 7417   |
| chr18:64654002-64654534   | 533 | 15 | 9.45E-04 | 3.83 | RefSeq | CCDC102B     | 120531 |
| chr15:86981971-86982460   | 490 | 13 | 9.45E-04 | 3.83 | RefSeq | ISG20        | -583   |
| chr2:168704978-168705577  | 600 | 17 | 9.45E-04 | 3.83 | RefSeq | STK39        | 106775 |
| chr4:39454280-39454788    | 509 | 15 | 9.45E-04 | 3.83 | RefSeq | UBE2K        | 78221  |
| chr10:111961946-111962291 | 346 | 10 | 9.45E-04 | 3.83 | RefSeq | MXI1         | 1967   |
| chr3:44975511-44976002    | 492 | 14 | 9.45E-04 | 3.83 | RefSeq | ZDHHC3       | 16677  |

Online supplements are not copyedited prior to posting and the author(s) take full responsibility for the accuracy of all data.

|                          |     |    |          |      |        |           |        |
|--------------------------|-----|----|----------|------|--------|-----------|--------|
| chr15:80552459-80552977  | 519 | 14 | 9.45E-04 | 3.83 | RefSeq | GOLGA6L10 | 262277 |
| chr10:62429733-62430216  | 484 | 14 | 9.53E-04 | 3.83 | ncRNA  | RHOBTB1   | 527    |
| chr2:218791684-218792290 | 607 | 18 | 9.53E-04 | 3.83 | RefSeq | ARPC2     | 1319   |
| chr5:170746738-170747255 | 518 | 15 | 9.53E-04 | 3.83 | RefSeq | NPM1      | -58    |
| chr5:94442050-94442544   | 495 | 14 | 9.53E-04 | 3.83 | RefSeq | MCTP1     | 783    |
| chr19:51899821-51900334  | 514 | 14 | 9.53E-04 | 3.83 | RefSeq | PRKD2     | 11891  |
| chr17:25111247-25111735  | 489 | 14 | 9.53E-04 | 3.83 | RefSeq | SSH2      | 169638 |
| chr3:157493520-157494045 | 526 | 15 | 9.53E-04 | 3.83 | RefSeq | KCNAB1    | 150075 |
| chr6:31656497-31657033   | 537 | 15 | 9.53E-04 | 3.83 | RefSeq | LTB       | 1149   |
| chr12:50490780-50491495  | 716 | 21 | 9.53E-04 | 3.83 | RefSeq | SCN8A     | 219493 |
| chr4:71098131-71098647   | 517 | 14 | 9.53E-04 | 3.83 | RefSeq | ODAM      | 1298   |
| chr6:53626135-53626751   | 617 | 15 | 9.53E-04 | 3.83 | RefSeq | KLHL31    | 11715  |
| chr2:48702331-48702817   | 487 | 14 | 9.53E-04 | 3.83 | RefSeq | GTF2A1L   | 3908   |
| chr6:53765913-53766417   | 505 | 14 | 9.53E-04 | 3.83 | RefSeq | LRRC1     | -1320  |
| chr2:207511513-207511998 | 486 | 14 | 9.53E-04 | 3.83 | RefSeq | CPO       | -525   |
| chr6:105958161-105958652 | 492 | 14 | 9.53E-04 | 3.83 | RefSeq | PREP      | -468   |
| chr14:60022360-60022844  | 485 | 14 | 9.53E-04 | 3.83 | RefSeq | C14orf39  | 0      |
| chr22:29421871-29422322  | 452 | 13 | 9.53E-04 | 3.83 | RefSeq | OSBP2     | 2102   |
| chr1:16959293-16959778   | 486 | 13 | 9.53E-04 | 3.82 | RefSeq | MST1L     | 3785   |
| chr19:993789-994284      | 496 | 14 | 9.53E-04 | 3.82 | RefSeq | ABCA7     | 2687   |
| chr1:166170227-166170720 | 494 | 14 | 9.53E-04 | 3.82 | RefSeq | MPC2      | 2212   |
| chr20:56157836-56158413  | 578 | 16 | 9.53E-04 | 3.82 | RefSeq | C20orf85  | -976   |
| chr10:22674496-22674996  | 501 | 14 | 9.53E-04 | 3.82 | RefSeq | SPAG6     | 116    |
| chr6:42123700-42124281   | 582 | 17 | 9.53E-04 | 3.82 | RefSeq | CCND3     | 330    |
| chr4:77125835-77126269   | 435 | 13 | 9.53E-04 | 3.82 | RefSeq | SDAD1     | 4871   |
| chr10:30695199-30695687  | 489 | 14 | 9.61E-04 | 3.82 | ncRNA  | GOLGA2P6  | 5156   |
| chrX:101281865-101282379 | 515 | 15 | 9.61E-04 | 3.82 | RefSeq | TCEAL6    | 1666   |
| chr15:61672306-61672818  | 513 | 13 | 9.61E-04 | 3.82 | RefSeq | USP3      | 88543  |
| chr16:18479726-18480239  | 514 | 14 | 9.61E-04 | 3.82 | RefSeq | NOMO2     | 697    |
| chr4:123389562-123390192 | 631 | 18 | 9.61E-04 | 3.82 | RefSeq | KIAA1109  | 78354  |
| chr12:55130284-55130800  | 517 | 15 | 9.61E-04 | 3.82 | RefSeq | TIMELESS  | -816   |
| chr21:42793705-42794222  | 518 | 15 | 9.61E-04 | 3.82 | RefSeq | SLC37A1   | 894    |
| chr8:57244153-57244645   | 493 | 14 | 9.61E-04 | 3.82 | RefSeq | PLAG1     | 41769  |
| chr10:16601835-16602498  | 664 | 16 | 9.61E-04 | 3.82 | RefSeq | C1QL3     | 1513   |
| chr17:34814743-34815257  | 515 | 14 | 9.69E-04 | 3.82 | RefSeq | MED1      | 45797  |
| chr16:65062244-65062756  | 513 | 15 | 9.69E-04 | 3.82 | RefSeq | BEAN1     | 43543  |
| chr18:32022968-32023475  | 508 | 14 | 9.69E-04 | 3.82 | RefSeq | MOCOS     | 1490   |
| chrX:119576711-119577211 | 501 | 14 | 9.77E-04 | 3.81 | RefSeq | CUL4B     | 1635   |
| chr19:45553660-45554187  | 528 | 16 | 9.77E-04 | 3.81 | RefSeq | PLD3      | 7488   |





|                           |     |    |          |       |        |           |       |
|---------------------------|-----|----|----------|-------|--------|-----------|-------|
| chr7:44051506-44052006    | 501 | 14 | 9.77E-04 | 3.81  | RefSeq | DBNL      | 742   |
| chr21:42606451-42606959   | 509 | 14 | 9.77E-04 | 3.81  | RefSeq | TFF3      | 1817  |
| chr11:102217478-102217980 | 503 | 14 | 9.77E-04 | 3.81  | RefSeq | MMP3      | 1573  |
| chr1:159120147-159120652  | 506 | 14 | 9.77E-04 | 3.81  | RefSeq | ITLN1     | 933   |
| chr5:122400470-122400955  | 486 | 13 | 9.77E-04 | 3.81  | RefSeq | PPIC      | -145  |
| chr5:112099479-112099966  | 488 | 14 | 9.77E-04 | 3.81  | RefSeq | APC       | -1489 |
| chr22:29694641-29695222   | 582 | 15 | 9.77E-04 | 3.81  | RefSeq | MORC2     | -453  |
| chr6:35419497-35419997    | 501 | 14 | 9.86E-04 | 3.81  | RefSeq | PPARD     | 1184  |
| chr3:153496691-153497205  | 515 | 15 | 9.86E-04 | 3.81  | RefSeq | MBNL1     | 28172 |
| chrY:9298041-9298555      | 515 | 15 | 9.86E-04 | 3.81  | RefSeq | TSPY3     | 2011  |
| chr5:159785285-159785626  | 342 | 10 | 9.86E-04 | 3.81  | RefSeq | PTTG1     | 3790  |
| chr3:68122407-68122910    | 504 | 15 | 9.94E-04 | 3.81  | RefSeq | FAM19A1   | -514  |
| chr2:105727200-105727590  | 391 | 11 | 9.94E-04 | 3.81  | RefSeq | NCK2      | -362  |
| chr22:36682710-36683195   | 486 | 14 | 9.94E-04 | -3.57 | RefSeq | POLR2F    | 3094  |
| chr3:156278868-156279433  | 566 | 15 | 9.86E-04 | -3.57 | RefSeq | MME       | -697  |
| chr3:180272616-180273081  | 466 | 14 | 9.86E-04 | -3.57 | RefSeq | ZMAT3     | -265  |
| chr6:161333876-161334374  | 499 | 15 | 9.86E-04 | -3.57 | RefSeq | MAP3K4    | 1127  |
| chr11:64642623-64643094   | 472 | 14 | 9.86E-04 | -3.57 | RefSeq | ZNHIT2    | -876  |
| chr1:32436811-32437308    | 498 | 15 | 9.86E-04 | -3.57 | RefSeq | CCDC28B   | -1266 |
| chr6:41992352-41992772    | 421 | 12 | 9.86E-04 | -3.57 | RefSeq | MED20     | 4084  |
| chr21:44956800-44957318   | 519 | 12 | 9.86E-04 | -3.57 | RefSeq | TSPEAR    | -876  |
| chr17:24013178-24013749   | 572 | 17 | 9.86E-04 | -3.57 | RefSeq | SUPT6H    | 0     |
| chr19:60556282-60556812   | 531 | 15 | 9.86E-04 | -3.57 | RefSeq | COX6B2    | 1183  |
| chr9:134922064-134922572  | 509 | 15 | 9.86E-04 | -3.57 | RefSeq | GTF3C5    | 26181 |
| chr6:165915440-165915932  | 493 | 14 | 9.77E-04 | -3.57 | RefSeq | PDE10A    | 79647 |
| chr22:23797280-23797882   | 603 | 16 | 9.77E-04 | -3.57 | RefSeq | KIAA1671  | 43339 |
| chr2:203444893-203445472  | 580 | 16 | 9.77E-04 | -3.57 | RefSeq | ICA1L     | 0     |
| chr17:20192014-20192525   | 512 | 15 | 9.77E-04 | -3.58 | ncRNA  | CCDC144CP | 26935 |
| chr5:141976303-141976797  | 495 | 12 | 9.77E-04 | -3.58 | RefSeq | FGF1      | 69448 |
| chr12:52964507-52965002   | 496 | 14 | 9.77E-04 | -3.58 | RefSeq | HNRNPA1   | 3752  |
| chr6:88237982-88238482    | 501 | 14 | 9.77E-04 | -3.58 | RefSeq | SLC35A1   | -880  |
| chr12:130005749-130006259 | 511 | 15 | 9.69E-04 | -3.58 | RefSeq | GPR133    | 1344  |
| chr9:134448368-134448940  | 573 | 17 | 9.69E-04 | -3.58 | RefSeq | BARHL1    | 554   |
| chr17:4096155-4096645     | 491 | 14 | 9.69E-04 | -3.58 | RefSeq | ANKFY1    | 17247 |
| chr22:29103039-29103645   | 607 | 17 | 9.69E-04 | -3.58 | ncRNA  | KIAA1656  | 250   |
| chrX:48640438-48640940    | 503 | 14 | 9.61E-04 | -3.58 | RefSeq | PQBP1     | 299   |
| chr1:113419374-113419783  | 410 | 12 | 9.61E-04 | -3.58 | RefSeq | LRIG2     | 2020  |
| chr14:104430309-104430811 | 503 | 15 | 9.61E-04 | -3.58 | RefSeq | CEP170B   | 27614 |
| chr1:117016052-117016414  | 363 | 10 | 9.61E-04 | -3.58 | ncRNA  | MIR320B1  | 158   |

Online supplements are not copyedited prior to posting and the author(s) take full responsibility for the accuracy of all data.

|                               |     |    |          |       |        |            |        |
|-------------------------------|-----|----|----------|-------|--------|------------|--------|
| chr2:169252791-169253309      | 519 | 12 | 9.61E-04 | -3.58 | RefSeq | CERS6      | 231786 |
| chr3:125294404-125294909      | 506 | 14 | 9.61E-04 | -3.58 | RefSeq | KALRN      | -1339  |
| chr1:778629-779174            | 546 | 16 | 9.61E-04 | -3.58 | ncRNA  | LINC01128  | 25795  |
| chr16:21378824-21379274       | 451 | 13 | 9.61E-04 | -3.58 | ncRNA  | SMG1P3     | 41830  |
| chr15:40539629-40540052       | 424 | 13 | 9.61E-04 | -3.58 | RefSeq | ZNF106     | 30636  |
| chr13:107671715-107672163     | 449 | 13 | 9.61E-04 | -3.58 | RefSeq | ABHD13     | 2951   |
| chr15:28484259-28484777       | 519 | 14 | 9.61E-04 | -3.58 | RefSeq | GOLGA8R    | 8979   |
| chr7:5886023-5886534          | 512 | 15 | 9.61E-04 | -3.58 | RefSeq | OCM        | -421   |
| chr1:167825940-167826442      | 503 | 14 | 9.61E-04 | -3.58 | RefSeq | SELP       | 39560  |
| chr19:41194157-41194539       | 383 | 10 | 9.61E-04 | -3.58 | RefSeq | ALKBH6     | 2447   |
| chrX:49065674-49066173        | 500 | 14 | 9.61E-04 | -3.58 | RefSeq | GAGE12J    | 221    |
| chr21:36785283-36785793       | 511 | 15 | 9.61E-04 | -3.58 | RefSeq | CLDN14     | 84945  |
| chr16:22734956-22735550       | 595 | 16 | 9.61E-04 | -3.58 | RefSeq | HS3ST2     | 1595   |
| chr21:37302201-37302616       | 416 | 12 | 9.61E-04 | -3.58 | RefSeq | RIPPLY3    | 1468   |
| chr13:31892106-31892678       | 573 | 16 | 9.61E-04 | -3.58 | RefSeq | N4BP2L1    | 7638   |
| chr1:200028526-200029053      | 528 | 15 | 9.61E-04 | -3.58 | RefSeq | NAV1       | 52940  |
| chr7:127929039-127929558      | 520 | 11 | 9.61E-04 | -3.58 | RefSeq | METTL2B    | 25020  |
| chr4:9707730-9708224          | 495 | 14 | 9.61E-04 | -3.58 | RefSeq | WDR1       | 19448  |
| chr16:30680078-30680570       | 493 | 15 | 9.61E-04 | -3.58 | RefSeq | C16orf93   | 497    |
| chr7:154492609-154493092      | 484 | 13 | 9.61E-04 | -3.58 | RefSeq | HTR5A      | 0      |
| chr21:34474865-34475364       | 500 | 14 | 9.61E-04 | -3.58 | ncRNA  | LINC00310  | 17     |
| chr2:94852518-94853009        | 492 | 14 | 9.61E-04 | -3.59 | ncRNA  | ANKRD20A8P | 33539  |
| chr4:146242385-146242944      | 560 | 15 | 9.61E-04 | -3.59 | RefSeq | ABCE1      | 3779   |
| chr13:113887539-113888119     | 581 | 16 | 9.61E-04 | -3.59 | RefSeq | RASA3      | 28079  |
| chr14:76914230-76914742       | 513 | 15 | 9.61E-04 | -3.59 | RefSeq | SAMD15     | 715    |
| chr14:76862443-76862957       | 515 | 15 | 9.61E-04 | -3.59 | RefSeq | GSTZ1      | 4984   |
| chr17:71908775-71909216       | 442 | 13 | 9.61E-04 | -3.59 | RefSeq | UBE2O      | 51668  |
| chr5:34714661-34715157        | 497 | 14 | 9.61E-04 | -3.59 | RefSeq | RAI14      | 22308  |
| chr1:111479818-111480328      | 511 | 15 | 9.61E-04 | -3.59 | RefSeq | DRAM2      | 4034   |
| chr2:108970359-108970871      | 513 | 15 | 9.61E-04 | -3.59 | RefSeq | EDAR       | 1390   |
| chr14:101091395-101091775     | 381 | 12 | 9.61E-04 | -3.59 | ncRNA  | DIO3OS     | 0      |
| chr17:4967647-4968200         | 554 | 12 | 9.53E-04 | -3.59 | RefSeq | ZNF232     | -525   |
| chr16:24476134-24476650       | 517 | 12 | 9.53E-04 | -3.59 | RefSeq | RBBP6      | 17725  |
| chr17:5288541-5289043         | 503 | 14 | 9.53E-04 | -3.59 | RefSeq | DHX33      | 24062  |
| chr6_cox_hap1:3946684-3947200 | 517 | 12 | 9.53E-04 | -3.59 | RefSeq | HLA-DRB1   | 861    |
| chr1:144025342-144025959      | 618 | 18 | 9.37E-04 | -3.59 | RefSeq | NBPF12     | 720390 |
| chr21:45532713-45533185       | 473 | 14 | 9.37E-04 | -3.59 | RefSeq | POFUT2     | -473   |
| chr5:77108394-77108781        | 388 | 11 | 9.37E-04 | -3.59 | RefSeq | TBCA       | -452   |
| chr10:118599272-118599766     | 495 | 14 | 9.29E-04 | -3.59 | RefSeq | ENO4       | 259    |

|                           |     |    |          |       |        |           |        |
|---------------------------|-----|----|----------|-------|--------|-----------|--------|
| chr10:64249988-64250476   | 489 | 14 | 9.29E-04 | -3.59 | RefSeq | EGR2      | -1054  |
| chr12:122870587-122871091 | 505 | 15 | 9.29E-04 | -3.59 | RefSeq | DNAH10    | 57592  |
| chr1:1642537-1643020      | 484 | 14 | 9.29E-04 | -3.59 | RefSeq | CDK11B    | 2700   |
| chr6:41859965-41860694    | 730 | 20 | 9.29E-04 | -3.59 | RefSeq | PRICKLE4  | 3487   |
| chr10:63475471-63475967   | 497 | 14 | 9.29E-04 | -3.59 | RefSeq | ARID5B    | 144452 |
| chrX:119928315-119928797  | 483 | 14 | 9.29E-04 | -3.59 | RefSeq | CT47A10   | 18523  |
| chr3:122711286-122711805  | 520 | 15 | 9.29E-04 | -3.59 | RefSeq | POLQ      | 35739  |
| chr12:119394723-119395265 | 543 | 15 | 9.29E-04 | -3.59 | RefSeq | DYNLL1    | 2680   |
| chr17:32925410-32925928   | 519 | 15 | 9.21E-04 | -3.59 | RefSeq | DUSP14    | 1346   |
| chr1:159311414-159311818  | 405 | 12 | 9.21E-04 | -3.59 | RefSeq | PVRL4     | 14192  |
| chr11:5226230-5226743     | 514 | 13 | 9.21E-04 | -3.59 | RefSeq | HBG1      | 921    |
| chr19:40959352-40959845   | 494 | 14 | 9.21E-04 | -3.6  | RefSeq | ARHGAP33  | 1095   |
| chr9:116124638-116125160  | 523 | 15 | 9.21E-04 | -3.6  | RefSeq | ORM1      | 0      |
| chr16:417375-417801       | 427 | 12 | 9.21E-04 | -3.6  | RefSeq | RAB11FIP3 | 1706   |
| chr3:61701397-61701897    | 501 | 15 | 9.21E-04 | -3.6  | RefSeq | PTPRG     | 179114 |
| chr5:60031242-60031742    | 501 | 14 | 9.21E-04 | -3.6  | RefSeq | DEPDC1B   | 9      |
| chr18:12992639-12993141   | 503 | 14 | 9.21E-04 | -3.6  | RefSeq | CEP192    | 11278  |
| chr1:19625062-19625411    | 350 | 11 | 9.13E-04 | -3.6  | RefSeq | CAPZB     | 59312  |
| chr1:149419841-149420326  | 486 | 14 | 9.05E-04 | -3.6  | RefSeq | VPS72     | 8988   |
| chr21:32165826-32166326   | 501 | 14 | 9.05E-04 | -3.6  | RefSeq | HUNK      | -1173  |
| chr7:102006915-102007278  | 364 | 11 | 9.05E-04 | -3.6  | RefSeq | RASA4     | 37148  |
| chr8:7106531-7107161      | 631 | 19 | 9.05E-04 | -3.6  | ncRNA  | LINC00965 | 1264   |
| chr5:145586707-145587292  | 586 | 13 | 9.05E-04 | -3.6  | RefSeq | RBM27     | 23351  |
| chr16:22017017-22017501   | 485 | 14 | 9.05E-04 | -3.6  | RefSeq | VWA3A     | 5657   |
| chr3:48460166-48460666    | 501 | 14 | 9.05E-04 | -3.6  | RefSeq | TMA7      | 3476   |
| chr10:11948611-11948960   | 350 | 10 | 9.05E-04 | -3.6  | RefSeq | PROSER2   | 43208  |
| chr4:113732225-113732682  | 458 | 13 | 9.05E-04 | -3.6  | RefSeq | ZGRF1     | 44919  |
| chr1:153505921-153506296  | 376 | 11 | 9.05E-04 | -3.6  | RefSeq | CLK2      | 3649   |
| chr1:153454445-153454950  | 506 | 14 | 9.05E-04 | -3.6  | ncRNA  | GBAP1     | 9000   |
| chr17:73614611-73615130   | 520 | 13 | 9.05E-04 | -3.6  | RefSeq | TNRC6C    | 102698 |
| chr4:81336193-81336828    | 636 | 17 | 9.05E-04 | -3.6  | RefSeq | PRDM8     | -853   |
| chr2:187265621-187266098  | 478 | 12 | 9.05E-04 | -3.6  | RefSeq | FAM171B   | -936   |
| chr6:151302844-151303386  | 543 | 16 | 9.05E-04 | -3.6  | RefSeq | MTHFD1L   | 74336  |
| chr1:109433535-109433971  | 437 | 12 | 9.05E-04 | -3.6  | RefSeq | TMEM167B  | -955   |
| chr3:49429995-49430529    | 535 | 16 | 9.05E-04 | -3.6  | RefSeq | AMT       | 4587   |
| chr17:37370586-37371109   | 524 | 15 | 9.05E-04 | -3.6  | RefSeq | TTC25     | 30184  |
| chr10:134871118-134871634 | 517 | 15 | 8.97E-04 | -3.6  | RefSeq | KNDC1     | 47157  |
| chr2:42578558-42578978    | 421 | 12 | 8.97E-04 | -3.6  | RefSeq | MTA3      | 3345   |
| chr3:52377478-52377980    | 503 | 14 | 8.97E-04 | -3.6  | RefSeq | DNAH1     | 52103  |

|                           |     |    |          |       |        |            |        |
|---------------------------|-----|----|----------|-------|--------|------------|--------|
| chr22:19125569-19126075   | 507 | 14 | 8.97E-04 | -3.6  | RefSeq | KLHL22     | 54096  |
| chr1:154604611-154604928  | 318 | 10 | 8.97E-04 | -3.61 | RefSeq | RHBG       | -676   |
| chr6:154398141-154398655  | 515 | 14 | 8.97E-04 | -3.61 | RefSeq | OPRM1      | 24817  |
| chr6:13735136-13735523    | 388 | 11 | 8.97E-04 | -3.61 | RefSeq | RANBP9     | 84253  |
| chr13:77009775-77010226   | 452 | 13 | 8.97E-04 | -3.61 | RefSeq | SCEL       | 1965   |
| chr16:2978430-2978944     | 515 | 15 | 8.97E-04 | -3.61 | ncRNA  | LINC00514  | -112   |
| chr19:11171965-11172524   | 560 | 16 | 8.97E-04 | -3.61 | RefSeq | DOCK6      | 61645  |
| chr12:119828002-119828538 | 537 | 16 | 8.97E-04 | -3.61 | RefSeq | SPPL3      | -1463  |
| chr6:43652929-43653447    | 519 | 15 | 8.97E-04 | -3.61 | RefSeq | POLH       | 1073   |
| chr3:12182039-12182519    | 481 | 10 | 8.97E-04 | -3.61 | RefSeq | SYN2       | 161205 |
| chrX:47938611-47939107    | 497 | 10 | 8.97E-04 | -3.61 | RefSeq | SSX5       | 2037   |
| chr3:198769897-198770254  | 358 | 11 | 8.89E-04 | -3.61 | RefSeq | BDH1       | 14338  |
| chr9:662594-663182        | 589 | 17 | 8.89E-04 | -3.61 | RefSeq | KANK1      | 202300 |
| chr3:46515986-46516475    | 490 | 14 | 8.89E-04 | -3.61 | RefSeq | RTP3       | 1497   |
| chr18:18982328-18982846   | 519 | 15 | 8.89E-04 | -3.61 | RefSeq | CABLES1    | 12603  |
| chr3:101315818-101316347  | 530 | 14 | 8.89E-04 | -3.61 | RefSeq | FILIP1L    | 0      |
| chr15:80985100-80985632   | 533 | 13 | 8.89E-04 | -3.61 | ncRNA  | GOLGA6L17P | 394042 |
| chr19:9185732-9186291     | 560 | 16 | 8.89E-04 | -3.61 | RefSeq | OR7D4      | 257    |
| chr5:151044917-151045455  | 539 | 11 | 8.89E-04 | -3.61 | RefSeq | SPARC      | 1354   |
| chr4:24768631-24769136    | 506 | 14 | 8.89E-04 | -3.61 | RefSeq | SEPSECS    | 2167   |
| chr19:17698454-17698990   | 537 | 16 | 8.81E-04 | -3.61 | RefSeq | MAP1S      | 7151   |
| chr12:130041560-130041971 | 412 | 12 | 8.72E-04 | -3.61 | RefSeq | GPR133     | 37155  |
| chr5:10300791-10301337    | 547 | 16 | 8.72E-04 | -3.61 | RefSeq | FAM173B    | 1685   |
| chr18:19339323-19339787   | 465 | 14 | 8.72E-04 | -3.61 | RefSeq | C18orf8    | 1891   |
| chr1:15563839-15564379    | 541 | 15 | 8.72E-04 | -3.61 | RefSeq | FHAD1      | 117484 |
| chr12:10255424-10255795   | 372 | 11 | 8.72E-04 | -3.61 | RefSeq | GABARAPL1  | -961   |
| chr4:8968028-8968670      | 643 | 18 | 8.72E-04 | -3.61 | RefSeq | USP17L10   | -537   |
| chr5:31571697-31572094    | 398 | 12 | 8.72E-04 | -3.61 | RefSeq | C5orf22    | 3567   |
| chr1:8408002-8408452      | 451 | 13 | 8.72E-04 | -3.61 | RefSeq | RERE       | 391835 |
| chr2:70377714-70378123    | 410 | 12 | 8.72E-04 | -3.61 | RefSeq | FAM136A    | 4602   |
| chrX:101518802-101519178  | 377 | 11 | 8.72E-04 | -3.61 | RefSeq | NXF2B      | 62408  |
| chr2:219532187-219532640  | 454 | 12 | 8.72E-04 | -3.62 | RefSeq | CDK5R2     | 0      |
| chr1:85104530-85105024    | 495 | 14 | 8.72E-04 | -3.62 | RefSeq | LPAR3      | 26461  |
| chr12:63439820-63440315   | 496 | 14 | 8.72E-04 | -3.62 | RefSeq | GNS        | -326   |
| chr19:12524365-12524765   | 401 | 11 | 8.64E-04 | -3.62 | RefSeq | ZNF564     | -1008  |
| chrX:148481820-148482357  | 538 | 16 | 8.64E-04 | -3.62 | RefSeq | HSFX2      | 2413   |
| chr15:63130968-63131478   | 511 | 13 | 8.64E-04 | -3.62 | RefSeq | SLC51B     | 6207   |
| chr1:195920902-195921373  | 472 | 14 | 8.64E-04 | -3.62 | RefSeq | DENND1B    | 89874  |
| chr18:53406004-53406588   | 585 | 13 | 8.64E-04 | -3.62 | RefSeq | FECH       | -1036  |

|                          |     |    |          |       |        |              |       |
|--------------------------|-----|----|----------|-------|--------|--------------|-------|
| chr6:112774430-112774916 | 487 | 12 | 8.64E-04 | -3.62 | RefSeq | RFPL4B       | -309  |
| chr2:237988004-237988355 | 352 | 11 | 8.64E-04 | -3.62 | RefSeq | COL6A3       | -414  |
| chr2:61987240-61987720   | 481 | 14 | 8.64E-04 | -3.62 | RefSeq | COMMD1       | 933   |
| chr1:28156711-28157236   | 526 | 11 | 8.64E-04 | -3.62 | RefSeq | SMPDL3B      | 22620 |
| chr20:3096654-3097160    | 507 | 14 | 8.64E-04 | -3.62 | RefSeq | LZTS3        | 5079  |
| chr15:53997271-53997773  | 503 | 15 | 8.64E-04 | -3.62 | RefSeq | NEDD4        | -649  |
| chr2:153233514-153234020 | 507 | 14 | 8.64E-04 | -3.62 | RefSeq | PRPF40A      | 48202 |
| chr6:30700624-30700953   | 330 | 10 | 8.64E-04 | -3.62 | RefSeq | MRPS18B      | 7159  |
| chrX:119921117-119921631 | 515 | 15 | 8.64E-04 | -3.62 | RefSeq | CT47A10      | 25689 |
| chr5:175989352-175989763 | 412 | 12 | 8.64E-04 | -3.62 | RefSeq | SNCB         | 401   |
| chr1:151864415-151864925 | 511 | 11 | 8.64E-04 | -3.63 | RefSeq | S100A13      | 8268  |
| chr17:45911906-45912389  | 484 | 14 | 8.64E-04 | -3.63 | RefSeq | RSAD1        | 717   |
| chr15:32093935-32094655  | 721 | 21 | 8.64E-04 | -3.63 | RefSeq | CHRM5        | 45554 |
| chr8:81157310-81157881   | 572 | 16 | 8.64E-04 | -3.63 | RefSeq | TPD52        | 88569 |
| chr12:68951721-68952209  | 489 | 14 | 8.64E-04 | -3.63 | RefSeq | CNOT2        | 28644 |
| chr12:52086410-52086863  | 454 | 13 | 8.64E-04 | -3.63 | RefSeq | SP1          | 26164 |
| chr11:63767964-63768519  | 556 | 15 | 8.64E-04 | -3.63 | RefSeq | FKBP2        | 2784  |
| chr13:24647342-24647846  | 505 | 15 | 8.64E-04 | -3.63 | ncRNA  | LINC00463    | 4294  |
| chr5:150926885-150927483 | 599 | 17 | 8.64E-04 | -3.63 | RefSeq | FAT2         | 1216  |
| chr16:56787260-56787704  | 445 | 13 | 8.64E-04 | -3.63 | RefSeq | CSNK2A2      | 1580  |
| chr20:61759593-61760074  | 482 | 14 | 8.64E-04 | -3.63 | RefSeq | RTEL1        | 0     |
| chr9:35719270-35719777   | 508 | 15 | 8.64E-04 | -3.63 | RefSeq | TLN1         | 2616  |
| chr20:25938341-25938911  | 571 | 16 | 8.64E-04 | -3.63 | ncRNA  | LOC100134868 | 0     |
| chr2:119842731-119843250 | 520 | 15 | 8.48E-04 | -3.63 | RefSeq | DBI          | 1761  |
| chr20:56846479-56847059  | 581 | 17 | 8.48E-04 | -3.63 | RefSeq | GNAS         | -1131 |
| chr17:38397099-38397460  | 362 | 11 | 8.48E-04 | -3.63 | RefSeq | RUNDC1       | 10991 |
| chr6:37056187-37056680   | 494 | 14 | 8.40E-04 | -3.63 | RefSeq | MTCH1        | 5626  |
| chr6:44367915-44368456   | 542 | 15 | 8.40E-04 | -3.63 | RefSeq | TCTE1        | 4981  |
| chrX:100193722-100194255 | 534 | 15 | 8.40E-04 | -3.63 | RefSeq | TRMT2B       | 0     |
| chr14:57817736-57818227  | 492 | 14 | 8.40E-04 | -3.63 | ncRNA  | FLJ31306     | 16382 |
| chr8:145692927-145693462 | 536 | 15 | 8.40E-04 | -3.63 | RefSeq | PPP1R16A     | 10    |
| chr1:54864600-54865095   | 496 | 11 | 8.40E-04 | -3.63 | RefSeq | ACOT11       | 78205 |
| chr5:155690354-155690866 | 513 | 10 | 8.40E-04 | -3.63 | RefSeq | SGCD         | 4009  |
| chr14:75191695-75192210  | 516 | 10 | 8.40E-04 | -3.63 | RefSeq | C14orf1      | 5082  |
| chr1:165904499-165905003 | 505 | 15 | 8.40E-04 | -3.63 | RefSeq | RCS1         | 38401 |
| chr19:12048076-12048561  | 486 | 14 | 8.32E-04 | -3.63 | RefSeq | ZNF844       | 11530 |
| chr16:84388779-84389190  | 412 | 12 | 8.32E-04 | -3.63 | RefSeq | EMC8         | 1460  |
| chr22:21558584-21558928  | 345 | 10 | 8.32E-04 | -3.63 | RefSeq | IGLL5        | -1032 |
| chr11:64289850-64290342  | 493 | 13 | 8.24E-04 | -3.64 | RefSeq | SF1          | 12173 |

|                           |     |    |          |       |        |              |        |
|---------------------------|-----|----|----------|-------|--------|--------------|--------|
| chr14:55150246-55150736   | 491 | 14 | 8.24E-04 | -3.64 | RefSeq | KTN1         | 33568  |
| chr8:30132372-30132889    | 518 | 15 | 8.24E-04 | -3.64 | RefSeq | DCTN6        | -466   |
| chr9:115080658-115081163  | 506 | 14 | 8.24E-04 | -3.64 | RefSeq | PRPF4        | 2923   |
| chr14:23490761-23491255   | 495 | 15 | 8.24E-04 | -3.64 | ncRNA  | DHRS4-AS1    | 1992   |
| chr1:159465727-159466245  | 519 | 15 | 8.24E-04 | -3.64 | RefSeq | NR1I3        | 8380   |
| chr11:133276463-133276878 | 416 | 12 | 8.24E-04 | -3.64 | ncRNA  | MIR4697HG    | 0      |
| chr15:56622683-56623104   | 422 | 12 | 8.24E-04 | -3.64 | RefSeq | LIPC         | 111216 |
| chr3:159310440-159310981  | 542 | 15 | 8.24E-04 | -3.64 | RefSeq | RSRC1        | 0      |
| chr16:21729267-21729717   | 451 | 13 | 8.24E-04 | -3.64 | ncRNA  | RRN3P1       | 8280   |
| chr22:40404438-40404903   | 466 | 13 | 8.24E-04 | -3.64 | RefSeq | NHP2L1       | 9957   |
| chr22:36705453-36705941   | 489 | 14 | 8.16E-04 | -3.64 | RefSeq | POLR2F       | 25837  |
| chr7:77271920-77272290    | 371 | 11 | 8.16E-04 | -3.64 | RefSeq | PHTF2        | 5875   |
| chr22:29051599-29052115   | 517 | 15 | 8.16E-04 | -3.64 | RefSeq | TBC1D10A     | 841    |
| chr1:160128668-160129024  | 357 | 11 | 8.16E-04 | -3.64 | RefSeq | ATF6         | 126010 |
| chr17:41065924-41066408   | 485 | 14 | 8.16E-04 | -3.64 | RefSeq | CRHR1        | 12431  |
| chr11:35112614-35113107   | 494 | 14 | 8.16E-04 | -3.64 | ncRNA  | LOC100507144 | 3049   |
| chr1:13541432-13541949    | 518 | 15 | 8.00E-04 | -3.64 | RefSeq | PRAMEF14     | 4150   |
| chr1:16175557-16176073    | 517 | 14 | 8.00E-04 | -3.64 | RefSeq | ZBTB17       | -342   |
| chr1:109833359-109833859  | 501 | 14 | 8.00E-04 | -3.64 | RefSeq | ATXN7L2      | 5275   |
| chr12:65149875-65150370   | 496 | 14 | 8.00E-04 | -3.65 | RefSeq | GRIP1        | 208823 |
| chr2:64287156-64287642    | 487 | 14 | 8.00E-04 | -3.65 | ncRNA  | LINC00309    | -1032  |
| chr13:98025073-98025562   | 490 | 14 | 8.00E-04 | -3.65 | RefSeq | STK24        | 1845   |
| chr21:46801892-46802460   | 569 | 16 | 8.00E-04 | -3.65 | RefSeq | DIP2A        | 98602  |
| chr7:98763211-98763629    | 419 | 12 | 8.00E-04 | -3.65 | RefSeq | ARPC1A       | 1779   |
| chr5:70916952-70917591    | 640 | 18 | 8.00E-04 | -3.65 | RefSeq | MCCC2        | -1280  |
| chrX:47999303-47999834    | 532 | 15 | 8.00E-04 | -3.65 | RefSeq | SSX1         | 0      |
| chr19:38053847-38054349   | 503 | 14 | 8.00E-04 | -3.65 | RefSeq | SLC7A9       | -1323  |
| chr8:7416316-7416824      | 509 | 15 | 8.00E-04 | -3.65 | ncRNA  | FAM90A7P     | 2507   |
| chr22:18455232-18455719   | 488 | 14 | 8.00E-04 | -3.65 | RefSeq | DGCR8        | 7477   |
| chr11:32568523-32568944   | 422 | 12 | 8.00E-04 | -3.65 | RefSeq | EIF3M        | 6634   |
| chr1:178112486-178113001  | 516 | 16 | 8.00E-04 | -3.65 | RefSeq | TOR1AIP2     | 564    |
| chr19:9407970-9408441     | 472 | 13 | 8.00E-04 | -3.65 | RefSeq | ZNF266       | -715   |
| chr3:15442980-15443521    | 542 | 15 | 8.00E-04 | -3.65 | RefSeq | METTL6       | 538    |
| chr7:66382088-66382667    | 580 | 16 | 8.00E-04 | -3.65 | ncRNA  | PMS2P4       | 22198  |
| chr19:60173083-60173524   | 442 | 13 | 8.00E-04 | -3.65 | RefSeq | NLRP2        | 4619   |
| chr18:71054913-71055427   | 515 | 15 | 8.00E-04 | -3.65 | RefSeq | TSHZ1        | 3215   |
| chr11:64706738-64707233   | 496 | 14 | 7.84E-04 | -3.65 | RefSeq | CAPN1        | 1476   |
| chr3:46715927-46716445    | 519 | 11 | 7.84E-04 | -3.65 | RefSeq | TMIE         | -1382  |
| chr11:109665191-109665537 | 347 | 10 | 7.84E-04 | -3.65 | RefSeq | RDX          | 7111   |

|                           |     |    |          |       |        |           |        |
|---------------------------|-----|----|----------|-------|--------|-----------|--------|
| chr18:42796253-42796745   | 493 | 14 | 7.84E-04 | -3.65 | RefSeq | TCEB3CL   | 1625   |
| chr12:95317905-95318418   | 514 | 14 | 7.84E-04 | -3.66 | RefSeq | CDK17     | 80     |
| chr19:4469649-4470185     | 537 | 15 | 7.84E-04 | -3.66 | RefSeq | PLIN4     | -932   |
| chr12:121752621-121753118 | 498 | 14 | 7.84E-04 | -3.66 | RefSeq | HCAR2     | 740    |
| chr20:48890389-48890759   | 371 | 11 | 7.84E-04 | -3.66 | RefSeq | BCAS4     | 45551  |
| chr6:167451196-167451680  | 485 | 13 | 7.67E-04 | -3.66 | RefSeq | CCR6      | 5911   |
| chr6:134414122-134414608  | 487 | 14 | 7.67E-04 | -3.66 | RefSeq | SLC2A12   | 875    |
| chr10:11691403-11691889   | 487 | 14 | 7.67E-04 | -3.66 | RefSeq | USP6NL    | 1906   |
| chr6:4947795-4948284      | 490 | 15 | 7.67E-04 | -3.66 | RefSeq | RPP40     | 1013   |
| chr2:159727777-159728367  | 591 | 17 | 7.67E-04 | -3.66 | RefSeq | TANC1     | 194385 |
| chr1:59747775-59748249    | 475 | 12 | 7.67E-04 | -3.66 | RefSeq | FGGY      | 212562 |
| chr1:7921205-7921667      | 463 | 14 | 7.67E-04 | -3.66 | RefSeq | TNFRSF9   | 4146   |
| chrY:5266052-5266568      | 517 | 13 | 7.67E-04 | -3.66 | RefSeq | PCDH11Y   | 281921 |
| chr17:20167004-20167484   | 481 | 14 | 7.67E-04 | -3.66 | ncRNA  | CCDC144CP | 1925   |
| chr15:63146897-63147405   | 509 | 15 | 7.67E-04 | -3.66 | RefSeq | RASL12    | 37     |
| chr5:80568733-80569234    | 502 | 15 | 7.67E-04 | -3.66 | RefSeq | CKMT2     | 3838   |
| chr16:12080284-12080785   | 502 | 15 | 7.67E-04 | -3.66 | RefSeq | SNX29     | 102192 |
| chr19:57313811-57314186   | 376 | 11 | 7.67E-04 | -3.66 | RefSeq | ZNF616    | 20818  |
| chr9:37872357-37872832    | 476 | 14 | 7.67E-04 | -3.66 | ncRNA  | SLC25A51  | 21519  |
| chr17:3515214-3515718     | 505 | 11 | 7.59E-04 | -3.66 | RefSeq | TAX1BP3   | 3005   |
| chr10:101364412-101364800 | 389 | 12 | 7.59E-04 | -3.67 | RefSeq | SLC25A28  | 5412   |
| chr16:561640-562256       | 617 | 18 | 7.59E-04 | -3.67 | RefSeq | PIGQ      | 1671   |
| chr14:93322513-93322853   | 341 | 10 | 7.59E-04 | -3.67 | RefSeq | PRIMA1    | 1667   |
| chrX:70349844-70350300    | 457 | 13 | 7.59E-04 | -3.67 | RefSeq | GJB1      | -1487  |
| chr15:20443098-20443610   | 513 | 15 | 7.51E-04 | -3.67 | RefSeq | CYFIP1    | -480   |
| chr9:34600552-34601058    | 507 | 14 | 7.51E-04 | -3.67 | RefSeq | RPP25L    | 1053   |
| chr11:117717500-117717999 | 500 | 12 | 7.51E-04 | -3.67 | RefSeq | CD3D      | 671    |
| chr9:108727403-108727909  | 507 | 13 | 7.51E-04 | -3.67 | RefSeq | ZNF462    | 62204  |
| chr1:154665923-154666426  | 504 | 14 | 7.51E-04 | -3.67 | RefSeq | C1orf61   | -114   |
| chr16:22397255-22397783   | 529 | 15 | 7.51E-04 | -3.67 | ncRNA  | SMG1P1    | 41425  |
| chr4:77361122-77361497    | 376 | 11 | 7.51E-04 | -3.67 | RefSeq | FAM47E    | 6905   |
| chr8:144970379-144970894  | 516 | 15 | 7.51E-04 | -3.67 | RefSeq | PUF60     | 12374  |
| chrX:100525325-100525879  | 555 | 16 | 7.51E-04 | -3.67 | RefSeq | BTK       | 1990   |
| chr1:110253236-110253958  | 723 | 21 | 7.43E-04 | -3.67 | RefSeq | CSF1      | -798   |
| chr13:109759608-109760031 | 424 | 12 | 7.43E-04 | -3.67 | RefSeq | COL4A2    | 1976   |
| chr11:56066740-56067232   | 493 | 14 | 7.43E-04 | -3.67 | RefSeq | OR5M11    | 78     |
| chr17:37251387-37252035   | 649 | 19 | 7.43E-04 | -3.67 | RefSeq | KLHL10    | 3818   |
| chr14:75906497-75907009   | 513 | 13 | 7.43E-04 | -3.67 | RefSeq | ESRRB     | -434   |
| chr6:150111658-150112209  | 552 | 15 | 7.43E-04 | -3.67 | RefSeq | PCMT1     | -315   |



|                           |     |    |          |       |        |           |        |
|---------------------------|-----|----|----------|-------|--------|-----------|--------|
| chr3:47396205-47396732    | 528 | 12 | 7.43E-04 | -3.68 | RefSeq | PTPN23    | -763   |
| chr19:57561615-57562130   | 516 | 15 | 7.43E-04 | -3.68 | RefSeq | ZNF610    | 30305  |
| chr7:148358159-148358562  | 404 | 12 | 7.43E-04 | -3.68 | RefSeq | PDIA4     | -1443  |
| chr12:115658333-115658746 | 414 | 12 | 7.43E-04 | -3.68 | RefSeq | C12orf49  | 1481   |
| chr5:135502822-135503270  | 449 | 13 | 7.43E-04 | -3.68 | RefSeq | SMAD5     | 6389   |
| chr18:42955263-42955764   | 502 | 14 | 7.43E-04 | -3.68 | RefSeq | IER3IP1   | 980    |
| chr15:32616255-32616781   | 527 | 14 | 7.43E-04 | -3.68 | RefSeq | GOLGA8B   | -740   |
| chr7:153374599-153375111  | 513 | 15 | 7.43E-04 | -3.68 | RefSeq | DPP6      | 159484 |
| chr17:37639550-37640100   | 551 | 16 | 7.35E-04 | -3.68 | RefSeq | STAT5B    | 41851  |
| chr11:64275229-64275752   | 524 | 15 | 7.35E-04 | -3.68 | RefSeq | PYGM      | 9012   |
| chr2:37045791-37046306    | 516 | 14 | 7.35E-04 | -3.68 | RefSeq | STRN      | 814    |
| chr8:6411624-6412193      | 570 | 16 | 7.35E-04 | -3.68 | RefSeq | MCPH1     | 160103 |
| chr8:27220096-27220607    | 512 | 15 | 7.35E-04 | -3.68 | RefSeq | TRIM35    | 4145   |
| chr15:79451879-79452587   | 709 | 19 | 7.35E-04 | -3.68 | RefSeq | TMC3      | 887    |
| chr16:55777631-55778134   | 504 | 13 | 7.35E-04 | -3.68 | RefSeq | FAM192A   | -153   |
| chr10:7872105-7872647     | 543 | 14 | 7.35E-04 | -3.68 | RefSeq | ATP5C1    | 2006   |
| chr3:47528255-47528719    | 465 | 11 | 7.35E-04 | -3.68 | RefSeq | ELP6      | 1485   |
| chr16:27123898-27124335   | 438 | 13 | 7.35E-04 | -3.68 | RefSeq | KDM8      | 1101   |
| chr2:207015852-207016356  | 505 | 14 | 7.35E-04 | -3.68 | RefSeq | ADAM23    | -257   |
| chr8:37848013-37848532    | 520 | 15 | 7.35E-04 | -3.68 | RefSeq | RAB11FIP1 | 27642  |
| chr16:21338880-21339355   | 476 | 14 | 7.35E-04 | -3.68 | RefSeq | NPIP3     | 4805   |
| chr14:52262583-52263089   | 507 | 15 | 7.27E-04 | -3.68 | RefSeq | PSMC6     | 18937  |
| chr1:181364326-181364816  | 491 | 13 | 7.27E-04 | -3.68 | RefSeq | LAMC1     | 105108 |
| chr1:150148607-150149123  | 517 | 14 | 7.27E-04 | -3.69 | RefSeq | THEM4     | 0      |
| chr8:36860722-36861113    | 392 | 11 | 7.27E-04 | -3.69 | RefSeq | KCNU1     | 99722  |
| chr20:30071531-30072033   | 503 | 15 | 7.27E-04 | -3.69 | RefSeq | CCM2L     | 9625   |
| chr19:36467437-36467922   | 486 | 14 | 7.27E-04 | -3.69 | RefSeq | TSHZ3     | 64109  |
| chr6:10807564-10808001    | 438 | 13 | 7.27E-04 | -3.69 | RefSeq | PAK1IP1   | 4390   |
| chr2:54927854-54928367    | 514 | 15 | 7.27E-04 | -3.69 | RefSeq | EML6      | 122201 |
| chr22:30922585-30923088   | 504 | 14 | 7.27E-04 | -3.69 | RefSeq | RFPL2     | 6377   |
| chr20:56990897-56991482   | 586 | 12 | 7.27E-04 | -3.69 | RefSeq | NELFCD    | 1239   |
| chr11:66028548-66029065   | 518 | 15 | 7.27E-04 | -3.69 | RefSeq | DPP3      | 24488  |
| chr11:64404713-64405192   | 480 | 13 | 7.19E-04 | -3.69 | RefSeq | EHD1      | -951   |
| chr5:11215541-11216058    | 518 | 14 | 7.19E-04 | -3.69 | RefSeq | CTNND2    | 425972 |
| chr5:60704835-60705354    | 520 | 12 | 7.11E-04 | -3.69 | RefSeq | ZSWIM6    | 40978  |
| chr15:30486350-30486826   | 477 | 14 | 7.11E-04 | -3.69 | ncRNA  | ULK4P1    | 27717  |
| chr11:5233896-5234337     | 442 | 10 | 7.11E-04 | -3.69 | RefSeq | HBG2      | -1308  |
| chr15:26232444-26232976   | 533 | 15 | 7.11E-04 | -3.69 | RefSeq | HERC2     | 7918   |
| chr11:71487902-71488417   | 516 | 15 | 7.03E-04 | -3.69 | RefSeq | LRTOMT    | 18877  |

Online supplements are not copyedited prior to posting and the author(s) take full responsibility for the accuracy of all data.



|                           |     |    |          |       |        |           |        |
|---------------------------|-----|----|----------|-------|--------|-----------|--------|
| chr4:109762844-109763360  | 517 | 14 | 7.03E-04 | -3.69 | RefSeq | RPL34     | 1673   |
| chr8:12327753-12328262    | 510 | 15 | 7.03E-04 | -3.69 | RefSeq | FAM86B2   | 9962   |
| chrX:132633857-132634313  | 457 | 14 | 6.87E-04 | -3.69 | RefSeq | GPC3      | 313027 |
| chr2:25118880-25119387    | 508 | 14 | 6.79E-04 | -3.7  | RefSeq | EFR3B     | 403    |
| chr9:42999421-43000119    | 699 | 18 | 6.79E-04 | -3.7  | ncRNA  | GXYLT1P3  | -1027  |
| chr10:13667262-13667718   | 457 | 13 | 6.79E-04 | -3.7  | RefSeq | PRPF18    | -1227  |
| chr5:95184141-95184657    | 517 | 15 | 6.79E-04 | -3.7  | RefSeq | GLRX      | 0      |
| chr14:95774552-95775208   | 657 | 18 | 6.79E-04 | -3.7  | RefSeq | BDKRB2    | 33664  |
| chr17:41949002-41949382   | 381 | 11 | 6.79E-04 | -3.7  | RefSeq | LRRC37A2  | 3610   |
| chr16:24931727-24932141   | 415 | 12 | 6.79E-04 | -3.7  | RefSeq | ARHGAP17  | 2060   |
| chr5:138665274-138665687  | 414 | 12 | 6.79E-04 | -3.7  | RefSeq | MATR3     | 27934  |
| chr14:102872682-102873368 | 687 | 20 | 6.79E-04 | -3.7  | RefSeq | EIF5      | 2590   |
| chr4:280119-280672        | 554 | 12 | 6.79E-04 | -3.7  | RefSeq | ZNF732    | -174   |
| chr3:152493369-152494013  | 645 | 19 | 6.79E-04 | -3.7  | RefSeq | MED12L    | 206094 |
| chr19:9982912-9983263     | 352 | 11 | 6.79E-04 | -3.7  | RefSeq | COL5A3    | -764   |
| chr3:180270514-180271086  | 573 | 16 | 6.79E-04 | -3.7  | RefSeq | ZMAT3     | 1265   |
| chr1:242582995-242583550  | 556 | 12 | 6.79E-04 | -3.7  | RefSeq | C1orf100  | 435    |
| chr11:89219291-89219784   | 494 | 13 | 6.79E-04 | -3.7  | ncRNA  | TRIM53AP  | 4478   |
| chr10:15171932-15172672   | 741 | 21 | 6.79E-04 | -3.71 | RefSeq | ACBD7     | -1150  |
| chr3:62436061-62436599    | 539 | 13 | 6.79E-04 | -3.71 | RefSeq | CADPS     | 399506 |
| chr6:26038319-26038821    | 503 | 14 | 6.70E-04 | -3.71 | RefSeq | SLC17A2   | 113    |
| chr16:30153073-30153496   | 424 | 13 | 6.70E-04 | -3.71 | ncRNA  | LOC613037 | 10938  |
| chr5:71658420-71659019    | 600 | 17 | 6.62E-04 | -3.71 | RefSeq | PTCD2     | 6470   |
| chr1:203581791-203582282  | 492 | 14 | 6.62E-04 | -3.71 | RefSeq | KLHDC8A   | 10560  |
| chrX:49186373-49186711    | 339 | 10 | 6.62E-04 | -3.71 | RefSeq | GAGE12F   | 2683   |
| chrX:55531277-55531650    | 374 | 11 | 6.62E-04 | -3.71 | RefSeq | USP51     | 707    |
| chr7:138173750-138174141  | 392 | 11 | 6.62E-04 | -3.71 | RefSeq | KIAA1549  | 142464 |
| chr11:33846365-33846902   | 538 | 15 | 6.54E-04 | -3.71 | RefSeq | LMO2      | 1184   |
| chr22:48687555-48687872   | 318 | 10 | 6.54E-04 | -3.71 | RefSeq | ALG12     | 10239  |
| chr17:54040951-54041462   | 512 | 15 | 6.54E-04 | -3.71 | RefSeq | TEX14     | 82954  |
| chr14:22522378-22522735   | 358 | 10 | 6.54E-04 | -3.72 | RefSeq | AJUBA     | -686   |
| chr6:49787877-49788377    | 501 | 15 | 6.54E-04 | -3.72 | RefSeq | CRISP2    | 886    |
| chr1:90166764-90167347    | 584 | 16 | 6.54E-04 | -3.72 | RefSeq | LRRC8D    | 107603 |
| chr8:120290457-120290953  | 497 | 14 | 6.54E-04 | -3.72 | RefSeq | MAL2      | 666    |
| chr10:126420857-126421408 | 552 | 15 | 6.54E-04 | -3.72 | RefSeq | FAM53B    | 1513   |
| chr2:206711425-206711787  | 363 | 11 | 6.46E-04 | -3.72 | RefSeq | NDUFS1    | 20702  |
| chr22:45466015-45466529   | 515 | 15 | 6.46E-04 | -3.72 | RefSeq | CERK      | 46288  |
| chr9:98838511-98838917    | 407 | 12 | 6.46E-04 | -3.72 | RefSeq | CTSV      | 2830   |
| chr11:17255652-17256169   | 518 | 14 | 6.46E-04 | -3.72 | RefSeq | NUCB2     | 790    |

|                           |     |    |          |       |        |           |        |
|---------------------------|-----|----|----------|-------|--------|-----------|--------|
| chr16:1869467-1869963     | 497 | 15 | 6.38E-04 | -3.72 | ncRNA  | LINC00254 | 4271   |
| chr3:197121675-197122168  | 494 | 15 | 6.38E-04 | -3.72 | RefSeq | TNK2      | -1397  |
| chr8:82067788-82068277    | 490 | 14 | 6.38E-04 | -3.72 | RefSeq | PAG1      | 118582 |
| chr4:5071806-5072303      | 498 | 14 | 6.38E-04 | -3.72 | RefSeq | CYTL1     | 0      |
| chr15:39311282-39311682   | 401 | 12 | 6.38E-04 | -3.73 | RefSeq | EXD1      | -1034  |
| chr12:42436890-42437229   | 340 | 10 | 6.30E-04 | -3.73 | RefSeq | PUS7L     | 1615   |
| chr8:12031707-12032401    | 695 | 17 | 6.30E-04 | -3.73 | RefSeq | USP17L2   | 1278   |
| chr1:108311766-108312143  | 378 | 11 | 6.30E-04 | -3.73 | ncRNA  | VAV3-AS1  | 3178   |
| chr16:16345383-16345902   | 520 | 15 | 6.30E-04 | -3.73 | ncRNA  | PKD1P1    | 26416  |
| chrX:48214791-48215238    | 448 | 13 | 6.30E-04 | -3.73 | RefSeq | SLC38A5   | -1202  |
| chr6:138581884-138582467  | 584 | 17 | 6.30E-04 | -3.73 | RefSeq | KIAA1244  | 57138  |
| chr6:44419869-44420401    | 533 | 15 | 6.30E-04 | -3.73 | RefSeq | SPATS1    | 1494   |
| chr17:23972256-23972806   | 551 | 16 | 6.30E-04 | -3.73 | RefSeq | KIAA0100  | 23499  |
| chr1:91562185-91562679    | 495 | 14 | 6.30E-04 | -3.73 | RefSeq | HFM1      | 80336  |
| chr5:149454212-149454735  | 524 | 15 | 6.30E-04 | -3.73 | RefSeq | CSF1R     | 18394  |
| chr19:54844054-54844548   | 495 | 15 | 6.30E-04 | -3.73 | RefSeq | SCAF1     | 6860   |
| chr7:107088580-107089169  | 590 | 17 | 6.30E-04 | -3.73 | RefSeq | SLC26A4   | 264    |
| chr17:8086855-8087222     | 368 | 11 | 6.30E-04 | -3.73 | RefSeq | CTC1      | 4917   |
| chr3:70092452-70092916    | 465 | 13 | 6.30E-04 | -3.73 | RefSeq | MITF      | 24011  |
| chr20:36636420-36636913   | 494 | 14 | 6.30E-04 | -3.73 | RefSeq | RALGAPB   | 101557 |
| chr8:18768751-18769249    | 499 | 12 | 6.30E-04 | -3.74 | RefSeq | PSD3      | 146228 |
| chr18:72328963-72329432   | 470 | 13 | 6.30E-04 | -3.74 | RefSeq | ZNF516    | 6703   |
| chr17:70768144-70768657   | 514 | 15 | 6.22E-04 | -3.74 | RefSeq | GGA3      | 1413   |
| chr16:18782642-18782991   | 350 | 10 | 6.22E-04 | -3.74 | RefSeq | SMG1      | 62237  |
| chrX:46826225-46826630    | 406 | 11 | 6.22E-04 | -3.74 | RefSeq | RGN       | 3527   |
| chr3:123814336-123814824  | 489 | 14 | 6.14E-04 | -3.74 | RefSeq | PARP15    | 35197  |
| chr3:187747348-187747708  | 361 | 10 | 6.14E-04 | -3.74 | RefSeq | TBCCD1    | 23319  |
| chr1:35796754-35797154    | 401 | 12 | 6.14E-04 | -3.74 | RefSeq | NCDN      | 774    |
| chr14:19459085-19459603   | 519 | 15 | 6.14E-04 | -3.74 | RefSeq | OR4K5     | 479    |
| chr7:6625732-6626223      | 492 | 12 | 6.14E-04 | -3.74 | RefSeq | ZNF853    | 3680   |
| chr3:42603479-42603928    | 450 | 13 | 6.14E-04 | -3.75 | RefSeq | SEC22C    | 13649  |
| chr19:11779058-11779542   | 485 | 11 | 6.14E-04 | -3.75 | RefSeq | ZNF491    | 8667   |
| chr12:109387156-109387688 | 533 | 15 | 6.14E-04 | -3.75 | RefSeq | GPN3      | 3222   |
| chr10:101476658-101477150 | 493 | 14 | 6.06E-04 | -3.75 | RefSeq | COX15     | 5264   |
| chr14:55142149-55142863   | 715 | 20 | 5.98E-04 | -3.75 | RefSeq | KTN1      | 25471  |
| chr17:45567649-45568189   | 541 | 15 | 5.98E-04 | -3.75 | RefSeq | PPP1R9B   | 14689  |
| chr7:44472829-44473360    | 532 | 16 | 5.98E-04 | -3.75 | RefSeq | NUDCD3    | 23551  |
| chr15:19034275-19035014   | 740 | 20 | 5.98E-04 | -3.75 | ncRNA  | GOLGA8CP  | 6587   |
| chr16:55218406-55218834   | 429 | 12 | 5.98E-04 | -3.75 | RefSeq | MT1E      | 1320   |

|                           |     |    |          |       |        |           |        |
|---------------------------|-----|----|----------|-------|--------|-----------|--------|
| chr2:6041398-6041892      | 495 | 14 | 5.98E-04 | -3.75 | ncRNA  | LOC400940 | 1837   |
| chr21:45699363-45699945   | 583 | 17 | 5.98E-04 | -3.75 | RefSeq | COL18A1   | 0      |
| chr16:87323223-87323707   | 485 | 15 | 5.98E-04 | -3.75 | RefSeq | PIEZO1    | 55167  |
| chrX:119947755-119948237  | 483 | 14 | 5.98E-04 | -3.75 | RefSeq | CT47A10   | -435   |
| chr1:119757203-119757582  | 380 | 11 | 5.98E-04 | -3.75 | RefSeq | HSD3B2    | -1495  |
| chr10:47212222-47212709   | 488 | 13 | 5.98E-04 | -3.75 | ncRNA  | FAM25BP   | 1912   |
| chr15:86964229-86964618   | 390 | 11 | 5.90E-04 | -3.75 | RefSeq | AEN       | -913   |
| chr19:22962989-22963386   | 398 | 11 | 5.90E-04 | -3.75 | RefSeq | ZNF728    | 14465  |
| chr5:68887192-68887802    | 611 | 13 | 5.90E-04 | -3.75 | RefSeq | OCLN      | 62846  |
| chr3:152590378-152590942  | 565 | 16 | 5.90E-04 | -3.75 | RefSeq | MED12L    | 303103 |
| chr12:103214575-103214906 | 332 | 10 | 5.90E-04 | -3.75 | RefSeq | TXNRD1    | 80888  |
| chr9:33666114-33666788    | 675 | 19 | 5.74E-04 | -3.76 | ncRNA  | PTENP1    | 631    |
| chr9:66263607-66264104    | 498 | 14 | 5.74E-04 | -3.76 | ncRNA  | LOC403323 | 29628  |
| chr7:129629076-129629732  | 657 | 19 | 5.74E-04 | -3.76 | RefSeq | TMEM209   | 2843   |
| chr12:50486768-50487347   | 580 | 17 | 5.74E-04 | -3.76 | RefSeq | SCN8A     | 215481 |
| chr10:115629269-115629944 | 676 | 18 | 5.65E-04 | -3.77 | RefSeq | NHLRC2    | 24888  |
| chr19:56652263-56652757   | 495 | 13 | 5.65E-04 | -3.77 | RefSeq | SIGLEC8   | 764    |
| chr5:217784-218405        | 622 | 17 | 5.65E-04 | -3.77 | RefSeq | PLEKHG4B  | 24411  |
| chr14:30557163-30557762   | 600 | 17 | 5.65E-04 | -3.77 | RefSeq | STRN3     | 7597   |
| chr19:57242852-57243370   | 519 | 13 | 5.65E-04 | -3.77 | RefSeq | ZNF432    | 516    |
| chr14:76919376-76919757   | 382 | 11 | 5.65E-04 | -3.77 | RefSeq | SAMD15    | 5861   |
| chr8:11180509-11180832    | 324 | 10 | 5.65E-04 | -3.77 | RefSeq | MTMR9     | 1099   |
| chr7:73858892-73859370    | 479 | 14 | 5.57E-04 | -3.77 | RefSeq | GTF2IRD2  | 46439  |
| chrX:114157975-114158494  | 520 | 15 | 5.57E-04 | -3.77 | RefSeq | IL13RA2   | 0      |
| chr19:21092000-21092523   | 524 | 15 | 5.57E-04 | -3.77 | RefSeq | ZNF714    | 35207  |
| chr16:1302945-1303288     | 344 | 10 | 5.57E-04 | -3.77 | RefSeq | UBE2I     | 3316   |
| chr3:53103360-53103940    | 581 | 15 | 5.57E-04 | -3.77 | RefSeq | RFT1      | 35571  |
| chr8:119190751-119191292  | 542 | 14 | 5.57E-04 | -3.77 | RefSeq | EXT1      | 1948   |
| chr13:45324473-45325023   | 551 | 15 | 5.57E-04 | -3.78 | RefSeq | SIAH3     | -625   |
| chr1:245988345-245988882  | 538 | 15 | 5.57E-04 | -3.78 | RefSeq | OR1C1     | -13    |
| chrX:119938115-119938517  | 403 | 12 | 5.57E-04 | -3.78 | RefSeq | CT47A10   | -515   |
| chr7:2254010-2254521      | 512 | 10 | 5.57E-04 | -3.78 | RefSeq | NUDT1     | 5627   |
| chr16:33114091-33114658   | 568 | 30 | 5.57E-04 | -3.78 | RefSeq | TP53TG3B  | 1007   |
| chr10:112686191-112686692 | 502 | 14 | 5.57E-04 | -3.78 | RefSeq | SHOC2     | 16900  |
| chrX:122847877-122848352  | 476 | 14 | 5.57E-04 | -3.78 | RefSeq | XIAP      | 26179  |
| chr8:124817785-124818243  | 459 | 13 | 5.57E-04 | -3.78 | RefSeq | ANXA13    | 586    |
| chr15:27811029-27811534   | 506 | 13 | 5.49E-04 | -3.78 | RefSeq | TJP1      | 236761 |
| chr6:30648546-30649064    | 519 | 15 | 5.49E-04 | -3.78 | RefSeq | ABCF1     | 1397   |
| chr11:61345031-61345530   | 500 | 10 | 5.49E-04 | -3.78 | RefSeq | FADS2     | 4780   |



|                           |     |    |          |       |        |              |        |
|---------------------------|-----|----|----------|-------|--------|--------------|--------|
| chr1:229547002-229547403  | 402 | 11 | 5.49E-04 | -3.78 | RefSeq | SPRTN        | 6697   |
| chr3:120879261-120879681  | 421 | 12 | 5.49E-04 | -3.78 | RefSeq | COX17        | -327   |
| chr1:143696120-143696685  | 566 | 16 | 5.49E-04 | -3.78 | RefSeq | PDE4DIP      | 9706   |
| chr10:75196109-75196768   | 660 | 19 | 5.49E-04 | -3.78 | RefSeq | SEC24C       | 21972  |
| chr16:18798241-18798812   | 572 | 16 | 5.41E-04 | -3.79 | RefSeq | SMG1         | 46416  |
| chr4:145785391-145786012  | 622 | 17 | 5.41E-04 | -3.79 | RefSeq | HHIP         | -586   |
| chr7:36998253-36998749    | 497 | 14 | 5.41E-04 | -3.79 | RefSeq | ELMO1        | 456706 |
| chr1:161028937-161029421  | 485 | 14 | 5.41E-04 | -3.79 | RefSeq | HSD17B7      | 1817   |
| chr1:26023325-26023875    | 551 | 15 | 5.41E-04 | -3.79 | RefSeq | MTFR1L       | 4341   |
| chr7:99411965-99412379    | 415 | 11 | 5.41E-04 | -3.79 | RefSeq | AZGP1        | -293   |
| chr10:75132208-75132751   | 544 | 16 | 5.41E-04 | -3.79 | ncRNA  | BMS1P4       | 27528  |
| chr19:63175394-63175947   | 554 | 16 | 5.41E-04 | -3.79 | RefSeq | C19orf18     | 1768   |
| chr14:73491737-73492422   | 686 | 19 | 5.41E-04 | -3.79 | RefSeq | COQ6         | 5029   |
| chr7:63950662-63951151    | 490 | 14 | 5.41E-04 | -3.79 | ncRNA  | ZNF138       | 58461  |
| chr1:109061607-109062112  | 506 | 14 | 5.41E-04 | -3.79 | RefSeq | FNDC7        | 4528   |
| chr3:194755007-194755550  | 544 | 14 | 5.41E-04 | -3.79 | RefSeq | ATP13A4      | 0      |
| chr4:15686522-15687009    | 488 | 14 | 5.41E-04 | -3.79 | RefSeq | PROM1        | 7684   |
| chr20:20480136-20480757   | 622 | 17 | 5.41E-04 | -3.79 | RefSeq | RALGAPA2     | 160510 |
| chr10:15249733-15250315   | 583 | 15 | 5.41E-04 | -3.79 | RefSeq | NMT2         | 387    |
| chr7:65342615-65343101    | 487 | 14 | 5.41E-04 | -3.79 | RefSeq | TPST1        | 34921  |
| chr10:75075231-75075570   | 340 | 10 | 5.41E-04 | -3.79 | RefSeq | SYNPO2L      | 10300  |
| chr7:72136793-72137326    | 534 | 15 | 5.41E-04 | -3.8  | ncRNA  | SPDYE8P      | 920    |
| chr7:65844692-65845030    | 339 | 10 | 5.41E-04 | -3.8  | RefSeq | RABGEF1      | 60179  |
| chr12:131256411-131256846 | 436 | 13 | 5.33E-04 | -3.8  | RefSeq | GALNT9       | 159133 |
| chr4:53190866-53191381    | 516 | 15 | 5.33E-04 | -3.8  | RefSeq | USP46        | 26136  |
| chr19:18198707-18199223   | 517 | 13 | 5.33E-04 | -3.8  | RefSeq | PDE4C        | 20788  |
| chr18:62423576-62424066   | 491 | 14 | 5.33E-04 | -3.8  | RefSeq | CDH19        | -1220  |
| chr4:166173140-166173480  | 341 | 10 | 5.33E-04 | -3.8  | RefSeq | TRIM60       | 539    |
| chr8:41548392-41548891    | 500 | 14 | 5.33E-04 | -3.8  | ncRNA  | LOC102723729 | 6154   |
| chr9:94096772-94097267    | 496 | 14 | 5.33E-04 | -3.8  | RefSeq | IARS         | -912   |
| chr19:11512308-11512895   | 588 | 16 | 5.33E-04 | -3.8  | RefSeq | CNN1         | 1729   |
| chr7:157190911-157191437  | 527 | 16 | 5.33E-04 | -3.8  | RefSeq | PTPRN2       | 881807 |
| chr9:4479312-4479821      | 510 | 15 | 5.33E-04 | -3.8  | RefSeq | SLC1A1       | -606   |
| chr3:195666179-195666670  | 492 | 14 | 5.33E-04 | -3.8  | RefSeq | ATP13A3      | 3588   |
| chr1:234751096-234751453  | 358 | 10 | 5.33E-04 | -3.81 | RefSeq | LGALS8       | 2959   |
| chr3:44661434-44661941    | 508 | 10 | 5.33E-04 | -3.81 | RefSeq | ZNF197       | 19919  |
| chr3:123896362-123896858  | 497 | 14 | 5.33E-04 | -3.81 | RefSeq | PARP14       | 14000  |
| chr17:74012767-74013353   | 587 | 16 | 5.33E-04 | -3.81 | RefSeq | DNAH17       | 71719  |
| chr17:41946669-41947193   | 525 | 15 | 5.33E-04 | -3.81 | RefSeq | LRRC37A2     | 1277   |

Online supplements are not copyedited prior to posting and the author(s) take full responsibility for the accuracy of all data.

|                           |     |    |          |       |        |           |        |
|---------------------------|-----|----|----------|-------|--------|-----------|--------|
| chr2:159026083-159026621  | 539 | 15 | 5.33E-04 | -3.81 | RefSeq | PKP4      | 4361   |
| chr14:73073152-73073641   | 490 | 10 | 5.33E-04 | -3.81 | RefSeq | ACOT1     | -40    |
| chr3:49441181-49441701    | 521 | 15 | 5.33E-04 | -3.81 | RefSeq | NICN1     | 61     |
| chr10:126656394-126656925 | 532 | 16 | 5.33E-04 | -3.81 | RefSeq | ZRANB1    | 35712  |
| chr6:41997555-41998041    | 487 | 14 | 5.25E-04 | -3.81 | RefSeq | BYSL      | 612    |
| chr3:151963259-151963821  | 563 | 16 | 5.25E-04 | -3.81 | RefSeq | SIAH2     | 133    |
| chr7:101987924-101988424  | 501 | 15 | 5.25E-04 | -3.81 | RefSeq | SPDYE2    | 9146   |
| chr17:36191496-36192008   | 513 | 14 | 5.25E-04 | -3.81 | RefSeq | KRT27     | 305    |
| chr11:100301773-100302320 | 548 | 11 | 5.25E-04 | -3.82 | RefSeq | ARHGAP42  | 238156 |
| chr18:46605822-46606334   | 513 | 10 | 5.25E-04 | -3.82 | RefSeq | MRO       | -69    |
| chr5:258546-259045        | 500 | 14 | 5.25E-04 | -3.82 | RefSeq | CCDC127   | 12253  |
| chrX:17030454-17030956    | 503 | 15 | 5.25E-04 | -3.82 | RefSeq | REPS2     | 155719 |
| chr16:8631851-8632265     | 415 | 12 | 5.25E-04 | -3.82 | RefSeq | METTL22   | 8823   |
| chr10:103739492-103739907 | 416 | 12 | 5.17E-04 | -3.82 | RefSeq | C10orf76  | 66016  |
| chr10:43606536-43607042   | 507 | 14 | 5.17E-04 | -3.82 | ncRNA  | HNRNPA3P1 | -664   |
| chr1:143649573-143650082  | 510 | 15 | 5.17E-04 | -3.82 | RefSeq | PDE4DIP   | 56309  |
| chrX:99785709-99786215    | 507 | 12 | 5.09E-04 | -3.82 | RefSeq | SRPX2     | 0      |
| chr6:26493279-26493726    | 448 | 13 | 5.09E-04 | -3.82 | RefSeq | BTN2A2    | 1861   |
| chr14:22467061-22467631   | 571 | 17 | 4.93E-04 | -3.83 | RefSeq | PRMT5     | 1004   |
| chr11:123686243-123686750 | 508 | 14 | 4.93E-04 | -3.83 | RefSeq | OR8D1     | -370   |
| chr22:22463607-22464228   | 622 | 18 | 4.93E-04 | -3.83 | RefSeq | SMARCB1   | 4457   |
| chrX:119904878-119905376  | 499 | 14 | 4.93E-04 | -3.83 | RefSeq | CT47A10   | -1323  |
| chr10:848842-849377       | 536 | 15 | 4.85E-04 | -3.83 | RefSeq | LARP4B    | 118269 |
| chr21:44869126-44869631   | 506 | 14 | 4.85E-04 | -3.83 | RefSeq | TSPEAR    | 86293  |
| chr18:26940710-26941219   | 510 | 15 | 4.85E-04 | -3.84 | ncRNA  | DSCAS     | 5161   |
| chr9:129725029-129725520  | 492 | 14 | 4.85E-04 | -3.84 | RefSeq | PIP5KL1   | 7378   |
| chr6:158163717-158164236  | 520 | 11 | 4.77E-04 | -3.84 | RefSeq | SNX9      | 0      |
| chr13:112483660-112484160 | 501 | 12 | 4.69E-04 | -3.84 | RefSeq | ATP11A    | 91016  |
| chr19:58355196-58355745   | 550 | 15 | 4.69E-04 | -3.84 | RefSeq | ZNF347    | -1070  |
| chr22:44952047-44952633   | 587 | 17 | 4.69E-04 | -3.84 | RefSeq | PPARA     | 26884  |
| chrX:153317147-153317651  | 505 | 14 | 4.69E-04 | -3.84 | RefSeq | ATP6AP1   | 6975   |
| chr2:159564415-159565133  | 719 | 17 | 4.69E-04 | -3.84 | RefSeq | TANC1     | 31023  |
| chr9:138417843-138418342  | 500 | 14 | 4.69E-04 | -3.84 | RefSeq | SDCCAG3   | 6534   |
| chr19:17817926-17818369   | 444 | 14 | 4.69E-04 | -3.84 | RefSeq | JAK3      | 1473   |
| chr16:70320262-70320760   | 499 | 14 | 4.69E-04 | -3.84 | RefSeq | AP1G1     | 79718  |
| chr8:22282300-22282816    | 517 | 15 | 4.69E-04 | -3.85 | RefSeq | SLC39A14  | 1593   |
| chr15:76005489-76005983   | 495 | 14 | 4.69E-04 | -3.85 | ncRNA  | LOC645752 | 261    |
| chr14:104526024-104526508 | 485 | 14 | 4.69E-04 | -3.85 | RefSeq | C14orf79  | 2363   |
| chr19:1124155-1124683     | 529 | 14 | 4.69E-04 | -3.85 | RefSeq | SBNO2     | 600    |

|                          |     |    |          |       |        |               |        |
|--------------------------|-----|----|----------|-------|--------|---------------|--------|
| chrX:71850026-71850595   | 570 | 15 | 4.69E-04 | -3.85 | RefSeq | PHKA1         | 160    |
| chr14:20529829-20530363  | 535 | 15 | 4.69E-04 | -3.85 | RefSeq | METTL17       | 2024   |
| chr11:49011405-49011909  | 505 | 12 | 4.69E-04 | -3.85 | RefSeq | TRIM49B       | 1677   |
| chr4:141034369-141034816 | 448 | 13 | 4.69E-04 | -3.86 | RefSeq | MAML3         | 259868 |
| chr1:58927304-58927846   | 543 | 15 | 4.69E-04 | -3.86 | RefSeq | MYSM1         | 10490  |
| chr4:148873170-148873670 | 501 | 14 | 4.69E-04 | -3.86 | RefSeq | ARHGAP10      | 267    |
| chrX:152258342-152258877 | 536 | 15 | 4.69E-04 | -3.86 | RefSeq | ZNF275        | 5535   |
| chr4:166422348-166422888 | 541 | 16 | 4.69E-04 | -3.86 | RefSeq | KLHL2         | 71727  |
| chr2:106447860-106448379 | 520 | 15 | 4.60E-04 | -3.86 | RefSeq | RGPD3         | 2855   |
| chr10:69900134-69900676  | 543 | 11 | 4.60E-04 | -3.86 | RefSeq | DNA2          | 1061   |
| chr19:3877328-3877873    | 546 | 16 | 4.60E-04 | -3.87 | RefSeq | ATCAY         | 45710  |
| chr3:140150665-140151290 | 626 | 17 | 4.60E-04 | -3.87 | RefSeq | FOXL2NB       | 1899   |
| chr2:242578045-242578533 | 489 | 14 | 4.60E-04 | -3.87 | ncRNA  | LINC01237     | 105858 |
| chr2:12081146-12081661   | 516 | 11 | 4.60E-04 | -3.87 | ncRNA  | LOC100506457  | 16453  |
| chr1:111487179-111487681 | 503 | 14 | 4.52E-04 | -3.87 | RefSeq | CEPT1         | 3407   |
| chr4:144700495-144700914 | 420 | 11 | 4.52E-04 | -3.87 | ncRNA  | GUSBP5        | 420    |
| chr1:12814454-12814785   | 332 | 10 | 4.52E-04 | -3.87 | RefSeq | PRAMEF11      | -602   |
| chr6:151820882-151821396 | 515 | 14 | 4.36E-04 | -3.88 | RefSeq | C6orf211      | 5796   |
| chr19:50701216-50701701  | 486 | 12 | 4.36E-04 | -3.88 | RefSeq | VASP          | -827   |
| chr2:48643785-48644302   | 518 | 15 | 4.28E-04 | -3.88 | RefSeq | STON1-GTF2A1L | 33217  |
| chr22:49412585-49413095  | 511 | 14 | 4.28E-04 | -3.89 | RefSeq | ARSA          | 373    |
| chr12:54789706-54790112  | 407 | 12 | 4.28E-04 | -3.89 | RefSeq | PA2G4         | 5336   |
| chr12:63083177-63083687  | 511 | 10 | 4.28E-04 | -3.89 | RefSeq | XPOT          | -733   |
| chr10:31699224-31699668  | 445 | 11 | 4.28E-04 | -3.89 | RefSeq | ZEB1          | 49154  |
| chr16:30152338-30152711  | 374 | 11 | 4.28E-04 | -3.89 | ncRNA  | LOC613037     | 11723  |
| chr10:35419047-35419540  | 494 | 11 | 4.28E-04 | -3.89 | RefSeq | CUL2          | 37     |
| chr2:87049662-87050218   | 557 | 15 | 4.28E-04 | -3.89 | RefSeq | RGPD1         | 51413  |
| chr5:78444866-78445383   | 518 | 15 | 4.28E-04 | -3.89 | RefSeq | BHMT          | 1506   |
| chr8:55095485-55095987   | 503 | 13 | 4.28E-04 | -3.89 | RefSeq | TCEA1         | 1583   |
| chr6:107456361-107456858 | 498 | 11 | 4.28E-04 | -3.89 | RefSeq | C6orf203      | 292    |
| chr22:20069548-20070057  | 510 | 14 | 4.20E-04 | -3.89 | RefSeq | RIMBP3C       | 1885   |
| chr22:35828966-35829482  | 517 | 10 | 4.20E-04 | -3.89 | RefSeq | TMPRSS6       | 6068   |
| chr8:86760575-86761063   | 489 | 13 | 4.20E-04 | -3.9  | ncRNA  | REXO1L2P      | 932    |
| chr9:5949755-5950263     | 509 | 15 | 4.20E-04 | -3.9  | RefSeq | KIAA2026      | 47741  |
| chr1:1655809-1656299     | 491 | 14 | 4.04E-04 | -3.9  | RefSeq | SLC35E2       | 11000  |
| chr17:78078018-78078369  | 352 | 11 | 4.04E-04 | -3.9  | RefSeq | FOXK2         | 7135   |
| chr1:119485470-119485996 | 527 | 15 | 3.96E-04 | -3.9  | RefSeq | WARS2         | -651   |
| chrX:125127820-125128323 | 504 | 14 | 3.96E-04 | -3.9  | RefSeq | DCAF12L2      | -58    |
| chrX:153281845-153282431 | 587 | 13 | 3.96E-04 | -3.91 | RefSeq | RPL10         | 2080   |

|                           |     |    |          |       |        |           |        |
|---------------------------|-----|----|----------|-------|--------|-----------|--------|
| chr12:94013937-94014482   | 546 | 15 | 3.96E-04 | -3.91 | RefSeq | FGD6      | 120890 |
| chr2:27653305-27653811    | 507 | 14 | 3.88E-04 | -3.91 | RefSeq | C2orf16   | 412    |
| chr20:60981542-60982048   | 507 | 14 | 3.88E-04 | -3.91 | RefSeq | DIDO1     | 46301  |
| chr16:22363484-22363966   | 483 | 14 | 3.80E-04 | -3.92 | ncRNA  | SMG1P1    | 7654   |
| chr22:20231420-20231964   | 545 | 16 | 3.80E-04 | -3.92 | RefSeq | RIMBP3C   | 3787   |
| chr14:20857755-20858282   | 528 | 15 | 3.80E-04 | -3.92 | RefSeq | RPGRIP1   | 31779  |
| chr19:46558558-46559032   | 475 | 12 | 3.80E-04 | -3.92 | RefSeq | B9D2      | 2887   |
| chr9:71478038-71478581    | 544 | 16 | 3.72E-04 | -3.93 | RefSeq | APBA1     | -942   |
| chrX:119942895-119943377  | 483 | 14 | 3.72E-04 | -3.93 | RefSeq | CT47A10   | -435   |
| chr20:3261581-3262177     | 597 | 17 | 3.64E-04 | -3.93 | RefSeq | C20orf194 | 74133  |
| chr5:175325893-175326432  | 540 | 11 | 3.64E-04 | -3.93 | RefSeq | THOC3     | 1493   |
| chr5:267508-267843        | 336 | 10 | 3.64E-04 | -3.93 | RefSeq | CCDC127   | 3455   |
| chr1:16920592-16921142    | 551 | 16 | 3.47E-04 | -3.94 | ncRNA  | ESPNP     | -1352  |
| chr2:190349878-190350419  | 542 | 15 | 3.47E-04 | -3.94 | RefSeq | ORMDL1    | 6924   |
| chr2:127999309-127999794  | 486 | 12 | 3.47E-04 | -3.94 | RefSeq | IWS1      | 764    |
| chrX:48048361-48048967    | 607 | 17 | 3.47E-04 | -3.94 | ncRNA  | SSX9      | 1592   |
| chr14:22599859-22600345   | 487 | 14 | 3.47E-04 | -3.95 | RefSeq | ACIN1     | 34319  |
| chr10:102809274-102809814 | 541 | 16 | 3.47E-04 | -3.95 | RefSeq | KAZALD1   | -1175  |
| chr9:5502065-5502562      | 498 | 14 | 3.47E-04 | -3.95 | RefSeq | PDCD1LG2  | 1520   |
| chr19:51013926-51014459   | 534 | 15 | 3.47E-04 | -3.95 | RefSeq | SYMPK     | 43930  |
| chr11:114878028-114878532 | 505 | 13 | 3.47E-04 | -3.95 | RefSeq | CADM1     | 1920   |
| chr21:42657302-42657812   | 511 | 14 | 3.47E-04 | -3.96 | RefSeq | TFF1      | 1902   |
| chr8:12481016-12481377    | 362 | 10 | 3.47E-04 | -3.96 | ncRNA  | LOC729732 | 86115  |
| chr6:36479634-36479986    | 353 | 11 | 3.47E-04 | -3.96 | RefSeq | PXT1      | 38659  |
| chr13:112482988-112483331 | 344 | 10 | 3.47E-04 | -3.96 | RefSeq | ATP11A    | 90344  |
| chr19:58640560-58641078   | 519 | 14 | 3.47E-04 | -3.96 | RefSeq | ZNF761    | 13521  |
| chr19:5785838-5786399     | 562 | 13 | 3.47E-04 | -3.97 | RefSeq | FUT6      | 4344   |
| chrX:119623654-119624149  | 496 | 13 | 3.47E-04 | -3.97 | RefSeq | MCTS1     | 1074   |
| chr19:10640960-10641450   | 491 | 14 | 3.39E-04 | -3.97 | RefSeq | ILF3      | 15023  |
| chr2:113971301-113971666  | 366 | 10 | 3.39E-04 | -3.98 | RefSeq | FOXD4L1   | -1465  |
| chrX:47851872-47852368    | 497 | 14 | 3.15E-04 | -3.99 | ncRNA  | SSX6      | 0      |
| chr17:7550174-7550620     | 447 | 13 | 3.15E-04 | -3.99 | RefSeq | EFNB3     | 929    |
| chr1:14307787-143078299   | 513 | 15 | 3.15E-04 | -4    | RefSeq | NBPF20    | 219619 |
| chr12:118590689-118591113 | 425 | 13 | 3.07E-04 | -4    | RefSeq | PRKAB1    | 545    |
| chr6:133132509-133133154  | 646 | 18 | 3.07E-04 | -4    | RefSeq | SLC18B1   | 28287  |
| chr5:132227242-132227744  | 503 | 14 | 3.07E-04 | -4    | RefSeq | GDF9      | 2732   |
| chr4:185809456-185809788  | 333 | 10 | 3.07E-04 | -4    | RefSeq | PRIMPOL   | 1695   |
| chr2:15989653-15990138    | 486 | 14 | 3.07E-04 | -4    | ncRNA  | MYCNUT    | 11681  |
| chr1:39096237-39096661    | 425 | 13 | 3.07E-04 | -4    | RefSeq | RRAGC     | 1422   |



|                           |     |    |          |       |        |          |        |
|---------------------------|-----|----|----------|-------|--------|----------|--------|
| chr16:28674107-28674984   | 878 | 23 | 3.07E-04 | -4    | RefSeq | NPIP9    | 2850   |
| chr17:562541-563046       | 506 | 13 | 3.07E-04 | -4    | RefSeq | VPS53    | 1801   |
| chrX:119923454-119923936  | 483 | 14 | 3.07E-04 | -4.01 | RefSeq | CT47A10  | 23384  |
| chr3:42613162-42613754    | 593 | 13 | 3.07E-04 | -4.01 | RefSeq | SEC22C   | 3823   |
| chr2:218797373-218798098  | 726 | 21 | 3.07E-04 | -4.01 | RefSeq | ARPC2    | 7008   |
| chr11:82675144-82675641   | 498 | 14 | 3.07E-04 | -4.01 | RefSeq | CCDC90B  | -45    |
| chr7:56087502-56087950    | 449 | 13 | 2.99E-04 | -4.01 | RefSeq | CCT6A    | 630    |
| chr9:35391880-35392247    | 368 | 11 | 2.91E-04 | -4.01 | RefSeq | UNC13B   | 239891 |
| chr2:219283873-219284357  | 485 | 14 | 2.91E-04 | -4.01 | RefSeq | TTLL4    | 61     |
| chr19:6687656-6688296     | 641 | 17 | 2.91E-04 | -4.01 | RefSeq | GPR108   | 338    |
| chr15:30475670-30476592   | 923 | 25 | 2.91E-04 | -4.01 | RefSeq | GOLGA8K  | 6194   |
| chr5:151040758-151041334  | 577 | 14 | 2.91E-04 | -4.01 | RefSeq | SPARC    | 5475   |
| chr5:21527068-21527514    | 447 | 13 | 2.91E-04 | -4.01 | ncRNA  | GUSBP1   | 31722  |
| chr11:92704083-92704593   | 511 | 15 | 2.91E-04 | -4.02 | RefSeq | CCDC67   | 552    |
| chr11:89656324-89656823   | 500 | 14 | 2.91E-04 | -4.02 | ncRNA  | DISC1FP1 | 32276  |
| chr4:39541381-39541847    | 467 | 14 | 2.83E-04 | -4.02 | RefSeq | PDS5A    | 114125 |
| chr5:149647772-149648536  | 765 | 22 | 2.83E-04 | -4.02 | RefSeq | CAMK2A   | 1061   |
| chr1:15925174-15925684    | 511 | 15 | 2.83E-04 | -4.02 | RefSeq | PLEKHM2  | 41760  |
| chr4:52581791-52582284    | 494 | 15 | 2.83E-04 | -4.02 | RefSeq | SGCB     | 16959  |
| chr7:115928071-115928733  | 663 | 19 | 2.83E-04 | -4.02 | RefSeq | CAV2     | 1180   |
| chr2:219789485-219790027  | 543 | 15 | 2.83E-04 | -4.02 | RefSeq | ABCB6    | 1930   |
| chr5:176000081-176000551  | 471 | 13 | 2.83E-04 | -4.02 | RefSeq | EIF4E1B  | 9792   |
| chr4:37504866-37505409    | 544 | 15 | 2.83E-04 | -4.02 | RefSeq | PGM2     | 189    |
| chr10:126703984-126704484 | 501 | 14 | 2.83E-04 | -4.02 | RefSeq | CTBP2    | 135131 |
| chr1:77367347-77367952    | 606 | 18 | 2.83E-04 | -4.02 | RefSeq | PIGK     | 89769  |
| chr15:72828385-72828969   | 585 | 14 | 2.75E-04 | -4.02 | RefSeq | CYP1A2   | 148    |
| chr2:131130864-131131645  | 782 | 22 | 2.67E-04 | -4.03 | RefSeq | POTEJ    | 45288  |
| chr2:46778352-46779141    | 790 | 18 | 2.67E-04 | -4.03 | RefSeq | SOCS5    | -462   |
| chrX:49217532-49218170    | 639 | 18 | 2.67E-04 | -4.03 | RefSeq | GAGE12F  | 5177   |
| chr13:33291323-33291860   | 538 | 16 | 2.67E-04 | -4.03 | RefSeq | RFC3     | 1117   |
| chrX:48929588-48930332    | 745 | 21 | 2.67E-04 | -4.03 | RefSeq | PRICKLE3 | 0      |
| chr12:44516556-44517078   | 523 | 15 | 2.67E-04 | -4.03 | RefSeq | ARID2    | 106669 |
| chr8:8136695-8137196      | 502 | 14 | 2.67E-04 | -4.03 | ncRNA  | FAM86B3P | 13193  |
| chr1:110361524-110362053  | 530 | 15 | 2.67E-04 | -4.03 | RefSeq | AHCYL1   | 32614  |
| chr3:15771660-15772303    | 644 | 19 | 2.67E-04 | -4.03 | RefSeq | ANKRD28  | 42393  |
| chr10:126708266-126708816 | 551 | 15 | 2.67E-04 | -4.03 | RefSeq | CTBP2    | 130799 |
| chr21:44845152-44845823   | 672 | 19 | 2.67E-04 | -4.03 | RefSeq | TSPEAR   | 110101 |
| chr3:197189985-197190409  | 425 | 13 | 2.67E-04 | -4.03 | ncRNA  | SDHAP1   | 11139  |
| chr1:149310878-149311344  | 467 | 13 | 2.67E-04 | -4.03 | RefSeq | GABPB2   | 1174   |

Online supplements are not copyedited prior to posting and the author(s) take full responsibility for the accuracy of all data.





|                           |     |    |          |       |        |           |        |
|---------------------------|-----|----|----------|-------|--------|-----------|--------|
| chr15:70760398-70760957   | 560 | 16 | 2.67E-04 | -4.03 | ncRNA  | HIGD2B    | 4587   |
| chr10:79414401-79415038   | 638 | 19 | 2.67E-04 | -4.04 | RefSeq | POLR3A    | 44267  |
| chr7:38874663-38875274    | 612 | 17 | 2.67E-04 | -4.04 | RefSeq | VPS41     | 40052  |
| chr5:16752358-16753013    | 656 | 14 | 2.67E-04 | -4.04 | RefSeq | MYO10     | 236373 |
| chr11:60864901-60865574   | 674 | 16 | 2.67E-04 | -4.04 | RefSeq | DAK       | 7671   |
| chrX:119894282-119894748  | 467 | 13 | 2.67E-04 | -4.04 | RefSeq | CT47B1    | -474   |
| chr17:46176617-46177162   | 546 | 16 | 2.67E-04 | -4.04 | RefSeq | LUC7L3    | 24692  |
| chr19:15440561-15441096   | 536 | 16 | 2.67E-04 | -4.04 | RefSeq | PGLYRP2   | 10220  |
| chr7:101983228-101983877  | 650 | 18 | 2.67E-04 | -4.04 | RefSeq | SPDYE2    | 4450   |
| chr19:63135878-63136454   | 577 | 16 | 2.67E-04 | -4.04 | RefSeq | ZNF418    | 2099   |
| chr16:74127225-74127593   | 369 | 11 | 2.67E-04 | -4.04 | RefSeq | CHST5     | -655   |
| chr14:92283607-92284097   | 491 | 14 | 2.59E-04 | -4.04 | RefSeq | LGMN      | 704    |
| chr6:112151122-112151681  | 560 | 16 | 2.59E-04 | -4.04 | RefSeq | FYN       | 149668 |
| chr17:35371886-35372608   | 723 | 20 | 2.59E-04 | -4.04 | RefSeq | GSDMA     | -144   |
| chr2:24401800-24402343    | 544 | 14 | 2.59E-04 | -4.04 | RefSeq | ITSN2     | 34559  |
| chr5:139040587-139041142  | 556 | 16 | 2.59E-04 | -4.05 | RefSeq | CXXC5     | 32102  |
| chr14:30097316-30097884   | 569 | 16 | 2.59E-04 | -4.05 | RefSeq | G2E3      | -196   |
| chr12:110603862-110604399 | 538 | 15 | 2.50E-04 | -4.05 | RefSeq | BRAP      | 3785   |
| chr10:119125806-119126217 | 412 | 12 | 2.50E-04 | -4.05 | RefSeq | PDZD8     | -878   |
| chr20:30122476-30123118   | 643 | 17 | 2.50E-04 | -4.05 | RefSeq | HCK       | 18824  |
| chr2:55128022-55128524    | 503 | 15 | 2.50E-04 | -4.05 | RefSeq | RTN4      | 2715   |
| chr14:20318025-20318531   | 507 | 15 | 2.50E-04 | -4.05 | RefSeq | RNASE6    | -519   |
| chr3:130368832-130369452  | 621 | 17 | 2.50E-04 | -4.05 | RefSeq | CNBP      | 16049  |
| chr7:98987094-98987762    | 669 | 18 | 2.50E-04 | -4.05 | RefSeq | FAM200A   | 0      |
| chrX:40477641-40478194    | 554 | 16 | 2.42E-04 | -4.05 | RefSeq | MED14OS   | -1398  |
| chr4:184839164-184839630  | 467 | 12 | 2.34E-04 | -4.06 | RefSeq | TRAPPC11  | 21750  |
| chr1:212792314-212792811  | 498 | 11 | 2.34E-04 | -4.06 | RefSeq | PTPN14    | -666   |
| chr3:75346447-75347021    | 575 | 16 | 2.34E-04 | -4.06 | ncRNA  | MIR4444-1 | 130    |
| chrX:106903235-106903782  | 548 | 16 | 2.34E-04 | -4.06 | RefSeq | TSC22D3   | 1892   |
| chr19:41211183-41211727   | 545 | 17 | 2.34E-04 | -4.06 | RefSeq | CLIP3     | 3687   |
| chr7:72132235-72133090    | 856 | 23 | 2.34E-04 | -4.06 | ncRNA  | SPDYE8P   | 5156   |
| chr3:158014709-158015145  | 437 | 12 | 2.34E-04 | -4.06 | ncRNA  | LINC00886 | 2401   |
| chr15:53450609-53451062   | 454 | 13 | 2.34E-04 | -4.07 | RefSeq | CCPG1     | 36939  |
| chr16:30107829-30108302   | 474 | 13 | 2.34E-04 | -4.07 | RefSeq | CORO1A    | 5597   |
| chr12:9487526-9488036     | 511 | 14 | 2.34E-04 | -4.07 | ncRNA  | DDX12P    | 4000   |
| chr1:144027352-144028036  | 685 | 18 | 2.34E-04 | -4.07 | RefSeq | NBPF12    | 722400 |
| chr11:47693469-47693912   | 444 | 13 | 2.34E-04 | -4.07 | RefSeq | AGBL2     | 0      |
| chr17:11837144-11837539   | 396 | 11 | 2.34E-04 | -4.07 | RefSeq | ZNF18     | 3876   |
| chr19:61135139-61135652   | 514 | 15 | 2.34E-04 | -4.07 | RefSeq | NLRP13    | 0      |

Online supplements are not copyedited prior to posting and the author(s) take full responsibility for the accuracy of all data.

|                           |      |    |          |       |        |              |        |
|---------------------------|------|----|----------|-------|--------|--------------|--------|
| chr14:20923962-20924539   | 578  | 15 | 2.34E-04 | -4.07 | RefSeq | CHD8         | 45169  |
| chr17:35479243-35479762   | 520  | 15 | 2.34E-04 | -4.07 | RefSeq | THRA         | 6649   |
| chr6:74288363-74288942    | 580  | 17 | 2.34E-04 | -4.07 | RefSeq | EEF1A1       | -886   |
| chr6:45458315-45458834    | 520  | 15 | 2.34E-04 | -4.07 | RefSeq | RUNX2        | 54283  |
| chr16:30199006-30199484   | 479  | 14 | 2.34E-04 | -4.07 | ncRNA  | SMG1P5       | 54713  |
| chr8:22477686-22478261    | 576  | 14 | 2.26E-04 | -4.08 | RefSeq | SORBS3       | -863   |
| chr10:75125201-75125744   | 544  | 15 | 2.26E-04 | -4.08 | RefSeq | AGAP5        | 1817   |
| chr5:218895-219644        | 750  | 21 | 2.26E-04 | -4.08 | RefSeq | PLEKHG4B     | 25522  |
| chr11:33055459-33056028   | 570  | 16 | 2.26E-04 | -4.08 | ncRNA  | LINC00294    | 1187   |
| chr8:12378521-12378973    | 453  | 13 | 2.26E-04 | -4.08 | ncRNA  | LOC100506990 | 39628  |
| chr11:46682152-46682775   | 624  | 18 | 2.26E-04 | -4.08 | RefSeq | ZNF408       | 2932   |
| chr10:48907342-48907854   | 513  | 14 | 2.26E-04 | -4.08 | ncRNA  | CTGLF12P     | 1811   |
| chr10:116570566-116571087 | 522  | 14 | 2.26E-04 | -4.08 | RefSeq | FAM160B1     | -406   |
| chr9:101020138-101020665  | 528  | 15 | 2.26E-04 | -4.08 | RefSeq | ALG2         | 3403   |
| chr3:99088305-99088909    | 605  | 17 | 2.26E-04 | -4.08 | RefSeq | CRYBG3       | 64731  |
| chr4:8977884-8978870      | 987  | 25 | 2.26E-04 | -4.08 | ncRNA  | USP17L6P     | 0      |
| chr5:154179454-154180062  | 609  | 18 | 2.26E-04 | -4.08 | RefSeq | FAXDC2       | 30345  |
| chr7:134322894-134323872  | 979  | 27 | 2.26E-04 | -4.09 | RefSeq | AGBL3        | 1095   |
| chr2:10016041-10016597    | 557  | 16 | 2.26E-04 | -4.09 | RefSeq | GRHL1        | 6798   |
| chr1:111488432-111489141  | 710  | 20 | 2.26E-04 | -4.09 | RefSeq | CEPT1        | 4660   |
| chr11:65521388-65521969   | 582  | 17 | 2.26E-04 | -4.09 | RefSeq | EIF1AD       | 4245   |
| chr16:2153924-2154606     | 683  | 16 | 2.26E-04 | -4.09 | RefSeq | TRAF7        | 8124   |
| chr1:203437938-203438565  | 628  | 17 | 2.26E-04 | -4.09 | RefSeq | DSTYK        | 8786   |
| chr9:94100984-94101557    | 574  | 17 | 2.26E-04 | -4.09 | RefSeq | NOL8         | 26141  |
| chr9:93163967-93164707    | 741  | 18 | 2.26E-04 | -4.09 | RefSeq | AUH          | 0      |
| chr9:74755727-74756350    | 624  | 18 | 2.26E-04 | -4.09 | RefSeq | ALDH1A1      | 1704   |
| chr12:10926406-10926996   | 591  | 17 | 2.26E-04 | -4.09 | RefSeq | PRH1         | 288494 |
| chr8:7872786-7874109      | 1324 | 36 | 2.26E-04 | -4.09 | RefSeq | USP17L3      | 0      |
| chr6:26964670-26965032    | 363  | 11 | 2.26E-04 | -4.09 | ncRNA  | GUSBP2       | 67281  |
| chr6:116705830-116706397  | 568  | 16 | 2.26E-04 | -4.09 | RefSeq | TSPYL1       | 1577   |
| chr7:158313894-158314777  | 884  | 25 | 2.26E-04 | -4.09 | RefSeq | ESYT2        | 304    |
| chr8:1775177-1776267      | 1091 | 32 | 2.26E-04 | -4.09 | RefSeq | ARHGEF10     | 15621  |
| chr15:33480101-33480728   | 628  | 17 | 2.26E-04 | -4.09 | RefSeq | DPH6         | 144969 |
| chr7:1490944-1491518      | 575  | 17 | 2.26E-04 | -4.1  | RefSeq | INTS1        | 19027  |
| chr11:4585566-4586084     | 519  | 14 | 2.26E-04 | -4.1  | RefSeq | TRIM68       | 0      |
| chr4:88941279-88941793    | 515  | 13 | 2.26E-04 | -4.1  | RefSeq | IBSP         | 1553   |
| chrX:22202473-22202988    | 516  | 15 | 2.26E-04 | -4.1  | RefSeq | ZNF645       | 1522   |
| chr10:100169716-100170169 | 454  | 13 | 2.26E-04 | -4.1  | RefSeq | HPS1         | 26526  |
| chr7:20008847-20009296    | 450  | 10 | 2.26E-04 | -4.1  | ncRNA  | LOC101927668 | 137279 |



|                           |     |    |          |       |        |              |        |
|---------------------------|-----|----|----------|-------|--------|--------------|--------|
| chr9:166768-167286        | 519 | 15 | 2.26E-04 | -4.1  | RefSeq | CBWD1        | 1790   |
| chr1:109529566-109530096  | 531 | 16 | 2.26E-04 | -4.1  | RefSeq | KIAA1324     | 71458  |
| chr5:147998006-147998513  | 508 | 15 | 2.26E-04 | -4.1  | RefSeq | HTR4         | 15771  |
| chr19:12110288-12110877   | 590 | 13 | 2.26E-04 | -4.1  | RefSeq | ZNF20        | 1346   |
| chr3:173044245-173044891  | 647 | 17 | 2.26E-04 | -4.11 | RefSeq | TMEM212      | 412    |
| chr16:2154936-2155509     | 574 | 16 | 2.26E-04 | -4.11 | RefSeq | TRAF7        | 9136   |
| chr10:75071542-75071913   | 372 | 11 | 2.26E-04 | -4.11 | RefSeq | MYOZ1        | -20    |
| chr20:34631553-34632100   | 548 | 15 | 2.26E-04 | -4.11 | ncRNA  | DLGAP4-AS1   | 2993   |
| chr22:49056726-49057293   | 568 | 16 | 2.26E-04 | -4.11 | RefSeq | PLXNB2       | 18044  |
| chr2:71073806-71074319    | 514 | 15 | 2.26E-04 | -4.11 | RefSeq | TEX261       | 1191   |
| chr21:43900505-43901161   | 657 | 18 | 2.26E-04 | -4.11 | RefSeq | HSF2BP       | 2642   |
| chr4:148825396-148825783  | 388 | 11 | 2.26E-04 | -4.11 | RefSeq | PRMT9        | -665   |
| chr2:213594372-213594907  | 536 | 15 | 2.26E-04 | -4.11 | RefSeq | IKZF2        | 129672 |
| chr6:26548825-26549211    | 387 | 10 | 2.26E-04 | -4.11 | RefSeq | BTN3A3       | 146    |
| chrX:99963750-99964202    | 453 | 13 | 2.26E-04 | -4.12 | RefSeq | CSTF2        | 1746   |
| chr1:32610958-32611629    | 672 | 19 | 2.26E-04 | -4.12 | RefSeq | BSDC1        | 21021  |
| chr13:25336126-25336802   | 677 | 19 | 2.26E-04 | -4.12 | RefSeq | ATP8A2       | 491917 |
| chr5:115935957-115936612  | 656 | 19 | 2.18E-04 | -4.12 | RefSeq | SEMA6A       | 1910   |
| chr12:131911136-131911787 | 652 | 19 | 2.18E-04 | -4.12 | RefSeq | GOLGA3       | 3713   |
| chr1:202001527-202001917  | 391 | 11 | 2.18E-04 | -4.12 | RefSeq | LAX1         | 620    |
| chr3:126232618-126233172  | 555 | 16 | 2.10E-04 | -4.12 | RefSeq | HEG1         | 24321  |
| chr8:12000677-12001193    | 517 | 15 | 2.10E-04 | -4.12 | RefSeq | ZNF705D      | 16421  |
| chr10:51262182-51262668   | 487 | 14 | 2.10E-04 | -4.12 | RefSeq | TIMM23B      | 220797 |
| chr15:99610732-99611269   | 538 | 15 | 2.10E-04 | -4.12 | RefSeq | CHSY1        | -1071  |
| chr11:71313725-71314276   | 552 | 16 | 2.10E-04 | -4.13 | ncRNA  | LOC100133315 | 2866   |
| chr14:22356907-22357573   | 667 | 18 | 2.10E-04 | -4.13 | RefSeq | SLC7A7       | 1288   |
| chr3:44934440-44935081    | 642 | 19 | 2.10E-04 | -4.13 | RefSeq | ZDHHC3       | 57598  |
| chr17:59919254-59919697   | 444 | 13 | 2.10E-04 | -4.13 | RefSeq | POLG2        | 3950   |
| chr16:28387146-28387698   | 553 | 14 | 2.10E-04 | -4.13 | RefSeq | CLN3         | 23207  |
| chr6:27476520-27477218    | 699 | 20 | 2.10E-04 | -4.13 | RefSeq | ZNF391       | 12017  |
| chr6:10635675-10636258    | 584 | 14 | 2.10E-04 | -4.13 | RefSeq | GCNT2        | 6121   |
| chr20:43849627-43850052   | 426 | 13 | 2.10E-04 | -4.13 | RefSeq | WFDC3        | 3903   |
| chr3:48442776-48443577    | 802 | 23 | 2.10E-04 | -4.13 | RefSeq | PLXNB1       | 2888   |
| chr7:126672717-126673269  | 553 | 14 | 2.10E-04 | -4.13 | RefSeq | GRM8         | 6396   |
| chr19:5238547-5239218     | 672 | 18 | 2.10E-04 | -4.13 | RefSeq | PTPRS        | 52597  |
| chr14:93596143-93596769   | 627 | 18 | 2.10E-04 | -4.13 | RefSeq | DDX24        | 20543  |
| chr2:190292200-190292963  | 764 | 20 | 2.10E-04 | -4.13 | RefSeq | ANKAR        | 43244  |
| chr2:241461149-241461828  | 680 | 20 | 2.10E-04 | -4.13 | RefSeq | AGXT         | 4314   |
| chr9:68942605-68943141    | 537 | 16 | 2.10E-04 | -4.13 | ncRNA  | LOC100133920 | 1424   |

Online supplements are not copyedited prior to posting and the author(s) take full responsibility for the accuracy of all data.



|                           |     |    |          |       |        |              |        |
|---------------------------|-----|----|----------|-------|--------|--------------|--------|
| chr22:21316395-21317256   | 862 | 24 | 2.10E-04 | -4.14 | RefSeq | GGTLC2       | 0      |
| chr16:4491916-4492463     | 548 | 11 | 2.10E-04 | -4.14 | RefSeq | HMOX2        | 25574  |
| chr22:16771402-16771991   | 590 | 17 | 2.10E-04 | -4.14 | RefSeq | MICAL3       | 115335 |
| chr16:945846-946371       | 526 | 16 | 2.10E-04 | -4.14 | RefSeq | LMF1         | 14615  |
| chr2:201636049-201636641  | 593 | 17 | 2.10E-04 | -4.14 | RefSeq | FAM126B      | 7997   |
| chr2:87873383-87874020    | 638 | 18 | 2.10E-04 | -4.14 | RefSeq | RGPD1        | 192405 |
| chr11:57067449-57068126   | 678 | 19 | 2.10E-04 | -4.14 | RefSeq | SMTNL1       | 759    |
| chr3:3862430-3863069      | 640 | 18 | 2.10E-04 | -4.14 | RefSeq | LRRN1        | 46309  |
| chr3:171167671-171168273  | 603 | 17 | 2.10E-04 | -4.14 | RefSeq | SEC62        | 397    |
| chr9:85803031-85803565    | 535 | 15 | 2.02E-04 | -4.14 | RefSeq | RMI1         | 17574  |
| chr12:912038-912588       | 551 | 16 | 2.02E-04 | -4.14 | RefSeq | RAD52        | 56881  |
| chr19:12116833-12117427   | 595 | 16 | 2.02E-04 | -4.14 | RefSeq | ZNF625       | 11120  |
| chr17:53968214-53968791   | 578 | 14 | 2.02E-04 | -4.14 | RefSeq | 42251        | 4388   |
| chr12:117310683-117311037 | 355 | 11 | 2.02E-04 | -4.14 | RefSeq | SUDS3        | 11942  |
| chr22:29198028-29198737   | 710 | 20 | 2.02E-04 | -4.15 | RefSeq | SEC14L3      | 0      |
| chr12:111428146-111428771 | 626 | 17 | 2.02E-04 | -4.15 | RefSeq | PTPN11       | 87227  |
| chr17:16642144-16642643   | 500 | 15 | 2.02E-04 | -4.15 | ncRNA  | USP32P1      | 11213  |
| chrX:77041692-77042221    | 530 | 15 | 2.02E-04 | -4.15 | RefSeq | COX7B        | 75     |
| chr8:12343957-12344501    | 545 | 15 | 2.02E-04 | -4.15 | ncRNA  | LOC100506990 | 5064   |
| chr7:72117570-72118093    | 524 | 15 | 2.02E-04 | -4.15 | ncRNA  | PMS2L2       | 2990   |
| chr7:30973083-30973687    | 605 | 15 | 2.02E-04 | -4.15 | RefSeq | GHRHR        | 2922   |
| chr19:38156628-38157232   | 605 | 17 | 2.02E-04 | -4.15 | RefSeq | C19orf40     | 1665   |
| chr16:45274720-45275125   | 406 | 12 | 2.02E-04 | -4.15 | RefSeq | VPS35        | 5521   |
| chrX:49219068-49219694    | 627 | 18 | 2.02E-04 | -4.15 | RefSeq | GAGE12F      | 6713   |
| chrX:49236783-49237271    | 489 | 14 | 2.02E-04 | -4.16 | RefSeq | GAGE12C      | 5287   |
| chr7:74963856-74964367    | 512 | 14 | 2.02E-04 | -4.16 | RefSeq | SPDYE5       | 1621   |
| chr7:101985680-101986232  | 553 | 15 | 2.02E-04 | -4.16 | RefSeq | SPDYE2       | 6902   |
| chr9:35812697-35813221    | 525 | 15 | 2.02E-04 | -4.17 | RefSeq | FAM221B      | 5524   |
| chr7:44473625-44474442    | 818 | 20 | 2.02E-04 | -4.17 | RefSeq | NUDCD3       | 22469  |
| chr7:38635936-38636513    | 578 | 17 | 2.02E-04 | -4.17 | RefSeq | AMPH         | 1180   |
| chr8:124851702-124852237  | 536 | 16 | 2.02E-04 | -4.17 | RefSeq | FAM91A1      | 1639   |
| chr17:20134687-20135211   | 525 | 15 | 2.02E-04 | -4.17 | RefSeq | SPECC1       | 203760 |
| chr1:148867678-148868327  | 650 | 17 | 2.02E-04 | -4.17 | RefSeq | ENSA         | 396    |
| chr17:78300024-78300517   | 494 | 14 | 2.02E-04 | -4.18 | RefSeq | FN3K         | 13283  |
| chr1:173304729-173305259  | 531 | 15 | 2.02E-04 | -4.18 | RefSeq | TNN          | 1112   |
| chr2:119321872-119322463  | 592 | 16 | 2.02E-04 | -4.18 | RefSeq | EN1          | 0      |
| chr7:74962166-74962836    | 671 | 19 | 2.02E-04 | -4.18 | RefSeq | SPDYE5       | 0      |
| chr2:130554518-130555056  | 539 | 15 | 2.02E-04 | -4.18 | RefSeq | POTEF        | 48210  |
| chr20:31856636-31857197   | 562 | 16 | 2.02E-04 | -4.18 | ncRNA  | ZNF341-AS1   | 5370   |

Online supplements are not copyedited prior to posting and the author(s) take full responsibility for the accuracy of all data.



|                          |      |    |          |       |        |                     |        |
|--------------------------|------|----|----------|-------|--------|---------------------|--------|
| chr9:68945121-68945763   | 643  | 18 | 1.94E-04 | -4.18 | ncRNA  | LOC100133920        | 3940   |
| chr6:159157369-159157796 | 428  | 12 | 1.94E-04 | -4.18 | RefSeq | EZR                 | 2649   |
| chr5:129117485-129118002 | 518  | 15 | 1.94E-04 | -4.18 | RefSeq | KIAA1024L           | 5702   |
| chr19:61053263-61054978  | 1716 | 47 | 1.94E-04 | -4.19 | RefSeq | NLRP4               | 13507  |
| chr7:102080991-102081559 | 569  | 16 | 1.94E-04 | -4.19 | RefSeq | SPDYE2              | 2983   |
| chr16:2421001-2421383    | 383  | 11 | 1.94E-04 | -4.19 | RefSeq | CCNF                | 1605   |
| chrX:119178110-119178587 | 478  | 14 | 1.94E-04 | -4.2  | RefSeq | RHOXF2B             | 1615   |
| chr11:65139116-65139881  | 766  | 23 | 1.94E-04 | -4.2  | RefSeq | MAP3K11             | -819   |
| chr3:75797511-75798089   | 579  | 16 | 1.94E-04 | -4.21 | RefSeq | FRG2C               | 1334   |
| chr14:89105559-89106080  | 522  | 15 | 1.94E-04 | -4.21 | RefSeq | FOXN3               | 49168  |
| chr20:30812448-30813180  | 733  | 20 | 1.94E-04 | -4.21 | RefSeq | DNMT3B              | -672   |
| chr15:28161818-28162366  | 549  | 15 | 1.94E-04 | -4.21 | RefSeq | GOLGA8J             | -84    |
| chr7:72130437-72130929   | 493  | 14 | 1.86E-04 | -4.21 | ncRNA  | SPDYE8P             | 7317   |
| chrX:119896725-119897439 | 715  | 21 | 1.86E-04 | -4.21 | RefSeq | CT47A10             | 1255   |
| chr5:41940790-41941175   | 386  | 11 | 1.86E-04 | -4.21 | RefSeq | C5orf51             | 563    |
| chr3:152547166-152547678 | 513  | 11 | 1.86E-04 | -4.21 | RefSeq | P2RY12              | 37613  |
| chr19:60075550-60075948  | 399  | 12 | 1.86E-04 | -4.22 | RefSeq | FCAR                | -1413  |
| chr5:154073913-154074496 | 584  | 13 | 1.86E-04 | -4.22 | RefSeq | LARP1               | 1258   |
| chr15:20267123-20267655  | 533  | 13 | 1.86E-04 | -4.22 | ncRNA  | GOLGA8DP            | -30    |
| chr20:45322557-45323075  | 519  | 15 | 1.86E-04 | -4.22 | RefSeq | ZMYND8              | 95966  |
| chr2:208816038-208816612 | 575  | 17 | 1.86E-04 | -4.22 | RefSeq | IDH1                | 10816  |
| chr17:37242654-37243076  | 423  | 12 | 1.86E-04 | -4.22 | RefSeq | NT5C3B              | 2974   |
| chr5:68890263-68890876   | 614  | 17 | 1.86E-04 | -4.23 | RefSeq | GTF2H2C_2           | -954   |
| chr12:49884566-49885055  | 490  | 14 | 1.86E-04 | -4.23 | ncRNA  | POU6F1              | 12690  |
| chr2:73886628-73887047   | 420  | 12 | 1.86E-04 | -4.23 | RefSeq | C2orf78             | 21804  |
| chr7:37381634-37382256   | 623  | 17 | 1.86E-04 | -4.23 | RefSeq | ELMO1               | 73199  |
| chr9:125067166-125067755 | 590  | 17 | 1.86E-04 | -4.23 | RefSeq | STRBP               | 2922   |
| chr4:79007221-79007689   | 469  | 13 | 1.86E-04 | -4.23 | RefSeq | MRPL1               | 4392   |
| chr15:98939799-98941072  | 1274 | 36 | 1.86E-04 | -4.23 | RefSeq | LINS                | 18897  |
| chr19:7002359-7002780    | 422  | 12 | 1.86E-04 | -4.23 | RefSeq | MBD3L2              | 2008   |
| chr16:57090679-57091367  | 689  | 20 | 1.86E-04 | -4.24 | RefSeq | NDRG4               | 35184  |
| chr16:56048453-56049211  | 759  | 22 | 1.86E-04 | -4.24 | RefSeq | COQ9                | 9615   |
| chr7:22204300-22204840   | 541  | 16 | 1.86E-04 | -4.24 | RefSeq | RAPGEF5             | 158219 |
| chr20:51634449-51635026  | 578  | 17 | 1.86E-04 | -4.24 | RefSeq | ZNF217              | -1405  |
| chr17:73390667-73391429  | 763  | 19 | 1.86E-04 | -4.24 | ncRNA  | FLJ45079            | 336    |
| chr2:110649097-110649542 | 446  | 13 | 1.86E-04 | -4.24 | ncRNA  | LIMS3-<br>LOC440895 | 15648  |
| chr4:79407199-79407726   | 528  | 15 | 1.86E-04 | -4.25 | RefSeq | FRAS1               | 209451 |
| chr8:67945885-67946413   | 529  | 15 | 1.86E-04 | -4.25 | RefSeq | MCMDC2              | 0      |
| chr8:82558365-82558987   | 623  | 18 | 1.86E-04 | -4.25 | RefSeq | FABP4               | -336   |

Online supplements are not copyedited prior to posting and the author(s) take full responsibility for the accuracy of all data.

|                           |     |    |          |       |        |           |         |
|---------------------------|-----|----|----------|-------|--------|-----------|---------|
| chr10:118189159-118189738 | 580 | 16 | 1.86E-04 | -4.25 | RefSeq | PNLIPRP3  | 11745   |
| chr2:27445826-27446483    | 658 | 18 | 1.86E-04 | -4.25 | RefSeq | EIF2B4    | 346     |
| chr7:6705790-6706144      | 355 | 11 | 1.86E-04 | -4.25 | RefSeq | ZNF12     | 6948    |
| chrX:1533041-1533641      | 601 | 17 | 1.86E-04 | -4.26 | RefSeq | ASMTL     | -385    |
| chr16:22447937-22448558   | 622 | 18 | 1.86E-04 | -4.26 | RefSeq | NPIP5     | 15592   |
| chr10:126841065-126841650 | 586 | 16 | 1.86E-04 | -4.26 | RefSeq | CTBP2     | -1450   |
| chr8:12033509-12034183    | 675 | 18 | 1.78E-04 | -4.26 | RefSeq | USP17L2   | 0       |
| chr17:73966649-73967226   | 578 | 13 | 1.78E-04 | -4.26 | RefSeq | DNAH17    | 117846  |
| chr8:107849507-107849882  | 376 | 11 | 1.78E-04 | -4.26 | RefSeq | ABRA      | 1767    |
| chr1:1836018-1836621      | 604 | 17 | 1.78E-04 | -4.27 | RefSeq | CALML6    | 0       |
| chr2:27201531-27201974    | 444 | 13 | 1.78E-04 | -4.27 | RefSeq | ABHD1     | 1370    |
| chr1:231259429-231259941  | 513 | 15 | 1.78E-04 | -4.27 | RefSeq | PCNXL2    | 238142  |
| chr14:80358521-80359050   | 530 | 15 | 1.78E-04 | -4.27 | RefSeq | CEP128    | 116588  |
| chr7:74861271-74861810    | 540 | 16 | 1.70E-04 | -4.28 | RefSeq | TRIM73    | -1029   |
| chr16:18751921-18752377   | 457 | 13 | 1.62E-04 | -4.28 | RefSeq | SMG1      | 92851   |
| chrX:49246232-49246793    | 562 | 16 | 1.53E-04 | -4.29 | RefSeq | GAGE2A    | 5170    |
| chr3:47817869-47818406    | 538 | 16 | 1.53E-04 | -4.29 | RefSeq | DHX30     | -997    |
| chr10:75134615-75134996   | 382 | 11 | 1.53E-04 | -4.29 | ncRNA  | BMS1P4    | 25283   |
| chr15:28985419-28985987   | 569 | 16 | 1.53E-04 | -4.29 | RefSeq | FAN1      | 2051    |
| chr9:138829492-138830017  | 526 | 15 | 1.53E-04 | -4.29 | RefSeq | RABL6     | 7297    |
| chr10:75175946-75176434   | 489 | 14 | 1.53E-04 | -4.3  | RefSeq | SEC24C    | 1809    |
| chrX:49245269-49245785    | 517 | 15 | 1.53E-04 | -4.3  | RefSeq | GAGE2A    | 4207    |
| chr11:68432223-68432871   | 649 | 19 | 1.53E-04 | -4.3  | RefSeq | IGHMBP2   | 4328    |
| chr1:53302141-53302910    | 770 | 15 | 1.37E-04 | -4.31 | RefSeq | PODN      | 1829    |
| chr9:28136724-28137419    | 696 | 18 | 1.37E-04 | -4.31 | RefSeq | LINGO2    | 1065580 |
| chr1:210860011-210860608  | 598 | 17 | 1.37E-04 | -4.31 | RefSeq | ATF3      | 54712   |
| chr1:58784281-58784719    | 439 | 13 | 1.37E-04 | -4.31 | RefSeq | OMA1      | 316     |
| chr1:109825013-109825862  | 850 | 23 | 1.37E-04 | -4.31 | RefSeq | SYPL2     | 14390   |
| chrX:103386593-103387528  | 936 | 24 | 1.37E-04 | -4.32 | RefSeq | ESX1      | -337    |
| chr14:104360257-104360804 | 548 | 11 | 1.29E-04 | -4.32 | ncRNA  | LINC00638 | 1674    |
| chr7:101780102-101780688  | 587 | 16 | 1.29E-04 | -4.32 | RefSeq | SPDYE6    | 2922    |
| chr1:28357801-28358323    | 523 | 15 | 1.29E-04 | -4.32 | RefSeq | PTAFR     | 17720   |
| chr20:54395920-54396551   | 632 | 19 | 1.29E-04 | -4.32 | RefSeq | AURKA     | 4208    |
| chr8:145711075-145711734  | 660 | 19 | 1.29E-04 | -4.33 | RefSeq | RECQL4    | 2285    |
| chr1:240076337-240076864  | 528 | 15 | 1.29E-04 | -4.33 | RefSeq | EXO1      | -1252   |
| chr7:6707793-6708421      | 629 | 17 | 1.29E-04 | -4.33 | RefSeq | ZNF12     | 4671    |
| chr9:666419-667039        | 621 | 18 | 1.29E-04 | -4.33 | RefSeq | KANK1     | 206125  |
| chr12:3063887-3064732     | 846 | 18 | 1.29E-04 | -4.34 | RefSeq | TSPAN9    | 7105    |
| chr12:105163796-105164336 | 541 | 13 | 1.29E-04 | -4.34 | RefSeq | CKAP4     | 1508    |

|                           |      |    |          |       |        |                     |        |
|---------------------------|------|----|----------|-------|--------|---------------------|--------|
| chr1:222370282-222370782  | 501  | 14 | 1.29E-04 | -4.34 | RefSeq | FBXO28              | 1870   |
| chr11:117982740-117983443 | 704  | 19 | 1.29E-04 | -4.35 | RefSeq | PHLDB1              | -73    |
| chr13:40393475-40394212   | 738  | 21 | 1.29E-04 | -4.35 | ncRNA  | SUGT1P3             | 0      |
| chr2:102340408-102340929  | 522  | 15 | 1.29E-04 | -4.35 | RefSeq | IL18R1              | 1233   |
| chr3:185498339-185498882  | 544  | 11 | 1.29E-04 | -4.35 | RefSeq | PSMD2               | -698   |
| chr17:37275062-37275600   | 539  | 11 | 1.29E-04 | -4.35 | RefSeq | KLHL11              | 0      |
| chr19:9296370-9296810     | 441  | 13 | 1.13E-04 | -4.36 | RefSeq | ZNF559-ZNF177       | 468    |
| chr11:63147912-63148405   | 494  | 14 | 1.13E-04 | -4.36 | RefSeq | ATL3                | 47618  |
| chr3:49288273-49288805    | 533  | 15 | 1.13E-04 | -4.36 | RefSeq | C3orf62             | 708    |
| chr2:118560844-118561362  | 519  | 15 | 1.13E-04 | -4.36 | RefSeq | INSIG2              | -1158  |
| chr7:73965741-73966367    | 627  | 18 | 1.13E-04 | -4.36 | ncRNA  | PMS2P5              | 20918  |
| chr20:61021825-61022381   | 557  | 16 | 1.13E-04 | -4.36 | RefSeq | DIDO1               | 5968   |
| chr5:138241341-138241910  | 570  | 17 | 1.13E-04 | -4.37 | RefSeq | CTNNA1              | 124357 |
| chrX:49070584-49071222    | 639  | 18 | 1.13E-04 | -4.37 | RefSeq | GAGE12J             | 5131   |
| chr17:70912220-70912828   | 609  | 18 | 1.13E-04 | -4.38 | RefSeq | GRB2                | 557    |
| chr7:47984028-47984519    | 492  | 14 | 1.13E-04 | -4.38 | RefSeq | HUS1                | 1229   |
| chr1:160800082-160800446  | 365  | 11 | 1.13E-04 | -4.38 | RefSeq | UAP1                | 2162   |
| chrX:49216646-49217224    | 579  | 17 | 1.13E-04 | -4.38 | RefSeq | GAGE12F             | 4291   |
| chr9:108666353-108666925  | 573  | 15 | 1.13E-04 | -4.38 | RefSeq | ZNF462              | 1154   |
| chrX:118582497-118583065  | 569  | 16 | 1.05E-04 | -4.41 | RefSeq | CXorf56             | 336    |
| chr11:104279583-104280106 | 524  | 15 | 9.69E-05 | -4.41 | ncRNA  | LOC643733           | 14007  |
| chr5:176624406-176625238  | 833  | 22 | 9.69E-05 | -4.41 | RefSeq | NSD1                | 130967 |
| chr11:123314848-123316000 | 1153 | 31 | 9.69E-05 | -4.41 | RefSeq | OR4D5               | 0      |
| chr19:54707350-54707824   | 475  | 14 | 9.69E-05 | -4.41 | RefSeq | FCGRT               | 2      |
| chr16:87751547-87752765   | 1219 | 35 | 9.69E-05 | -4.42 | ncRNA  | LINC00304           | -364   |
| chr16:3082705-3083232     | 528  | 15 | 9.69E-05 | -4.42 | RefSeq | ZSCAN10             | 6088   |
| chr1:166150157-166150783  | 627  | 18 | 9.69E-05 | -4.42 | RefSeq | ADCY10              | -68    |
| chr9:114104044-114104657  | 614  | 18 | 8.89E-05 | -4.43 | RefSeq | PTBP3               | 31109  |
| chr3:47597637-47598207    | 571  | 16 | 8.89E-05 | -4.45 | RefSeq | CSPG5               | -902   |
| chr2:110648093-110648678  | 586  | 16 | 8.89E-05 | -4.45 | ncRNA  | LIMS3-<br>LOC440895 | 16512  |
| chr19:46635988-46636823   | 836  | 19 | 8.89E-05 | -4.46 | RefSeq | ATP5SL              | 499    |
| chr10:127579635-127580276 | 642  | 18 | 8.89E-05 | -4.47 | RefSeq | FANK1               | 4537   |
| chr17:43370440-43371383   | 944  | 23 | 8.89E-05 | -4.47 | ncRNA  | LOC100506325        | 2387   |
| chr3:154364367-154364940  | 574  | 15 | 8.89E-05 | -4.47 | RefSeq | RAP2B               | 1676   |
| chr14:65004279-65004834   | 556  | 15 | 8.89E-05 | -4.47 | RefSeq | FUT8                | 57216  |
| chr7:101894663-101895288  | 626  | 17 | 8.89E-05 | -4.47 | RefSeq | LRWD1               | 2268   |
| chr19:2232043-2232934     | 892  | 25 | 8.89E-05 | -4.48 | RefSeq | C19orf35            | 248    |
| chr5:140166141-140166739  | 599  | 17 | 8.89E-05 | -4.48 | RefSeq | PCDHA1              | 20236  |
| chr17:36235869-36236547   | 679  | 18 | 8.89E-05 | -4.49 | RefSeq | TMEM99              | 6906   |



|                              |     |    |          |       |        |           |        |
|------------------------------|-----|----|----------|-------|--------|-----------|--------|
| chr2:51113197-51113869       | 673 | 19 | 8.89E-05 | -4.5  | RefSeq | NRXN1     | -18    |
| chr11:67109561-67110281      | 721 | 19 | 8.89E-05 | -4.5  | RefSeq | GSTP1     | 1919   |
| chr10:76539876-76540427      | 552 | 16 | 8.89E-05 | -4.5  | RefSeq | DUSP13    | -899   |
| chr17:2181816-2182469        | 654 | 19 | 8.89E-05 | -4.5  | RefSeq | TSR1      | 4960   |
| chr1:149486845-149487432     | 588 | 18 | 8.08E-05 | -4.52 | RefSeq | PIP5K1A   | 49200  |
| chr10:48579108-48579736      | 629 | 18 | 8.08E-05 | -4.52 | ncRNA  | GLUD1P7   | 6510   |
| chr5:56147540-56148357       | 818 | 21 | 8.08E-05 | -4.52 | RefSeq | MAP3K1    | 883    |
| chrX:227522-228210           | 689 | 19 | 8.08E-05 | -4.53 | RefSeq | PPP2R3B   | 39481  |
| chr1:153288690-153289229     | 540 | 16 | 8.08E-05 | -4.53 | RefSeq | DCST1     | 15784  |
| chr7:151568623-151569198     | 576 | 16 | 8.08E-05 | -4.53 | RefSeq | KMT2C     | 194826 |
| chr5:43073035-43073731       | 697 | 19 | 8.08E-05 | -4.54 | ncRNA  | LOC648987 | 29568  |
| chr1:144022706-144023543     | 838 | 23 | 7.27E-05 | -4.54 | RefSeq | NBPF12    | 717754 |
| chr7:44008532-44009145       | 614 | 17 | 6.46E-05 | -4.56 | RefSeq | SPDYE1    | 1518   |
| chr8:70569455-70569985       | 531 | 11 | 6.46E-05 | -4.56 | RefSeq | SULF1     | 28042  |
| chr16:3871392-3871948        | 557 | 16 | 6.46E-05 | -4.56 | RefSeq | CREBBP    | -1269  |
| chr10:7783971-7784425        | 455 | 14 | 6.46E-05 | -4.56 | RefSeq | ITIH2     | -817   |
| chr19:46952491-46953026      | 536 | 16 | 5.65E-05 | -4.57 | RefSeq | CEACAM6   | 1223   |
| chrX:119903990-119904472     | 483 | 14 | 5.65E-05 | -4.57 | RefSeq | CT47A10   | -435   |
| chr7:73963431-73964056       | 626 | 18 | 5.65E-05 | -4.57 | ncRNA  | PMS2P5    | 18608  |
| chr1:226889574-226890257     | 684 | 18 | 5.65E-05 | -4.58 | ncRNA  | RHOU      | 42557  |
| chr3:33680724-33681298       | 575 | 16 | 5.65E-05 | -4.58 | RefSeq | CLASP2    | 53412  |
| chr22:16616330-16616982      | 653 | 18 | 5.65E-05 | -4.58 | RefSeq | BID       | 20280  |
| chr10:70675364-70675892      | 529 | 15 | 5.65E-05 | -4.6  | RefSeq | HKDC1     | 25299  |
| chr16:28671193-28671704      | 512 | 14 | 5.65E-05 | -4.61 | RefSeq | NPIP9     | 0      |
| chr19:2724299-2724924        | 626 | 17 | 5.65E-05 | -4.61 | RefSeq | SGTA      | 9431   |
| chr22:49334801-49335387      | 587 | 16 | 5.65E-05 | -4.61 | RefSeq | KLHDC7B   | 1473   |
| chr16:15380013-15380485      | 473 | 14 | 5.65E-05 | -4.62 | RefSeq | NPIPA5    | -360   |
| chr9:129255804-129256600     | 797 | 23 | 5.65E-05 | -4.62 | RefSeq | LRSAM1    | 2218   |
| chr16:65814915-65815488      | 574 | 15 | 5.65E-05 | -4.63 | RefSeq | LRRC29    | 2915   |
| chr5_h2_hap1:1006229-1006797 | 569 | 17 | 5.65E-05 | -4.63 | RefSeq | GTF2H2C_2 | -936   |
| chr16:30159356-30159831      | 476 | 14 | 4.85E-05 | -4.64 | ncRNA  | LOC613037 | 4603   |
| chr5:40871178-40871754       | 577 | 15 | 4.85E-05 | -4.64 | RefSeq | RPL37     | -33    |
| chr7:97830572-97831143       | 572 | 17 | 4.85E-05 | -4.65 | RefSeq | BAIAP2L1  | 37221  |
| chr1:1658133-1658879         | 747 | 16 | 4.85E-05 | -4.65 | RefSeq | SLC35E2   | 8420   |
| chr7:72139293-72139801       | 509 | 15 | 4.85E-05 | -4.65 | ncRNA  | SPDYE8P   | -1047  |
| chr1:27574429-27574860       | 432 | 12 | 4.85E-05 | -4.66 | RefSeq | FCN3      | -526   |
| chr14:34656993-34657515      | 523 | 15 | 4.85E-05 | -4.66 | RefSeq | PPP2R3C   | 3756   |
| chr1:27093219-27093906       | 688 | 20 | 4.85E-05 | -4.67 | RefSeq | GPATCH3   | 5644   |
| chrX:152516355-152516757     | 403 | 12 | 4.85E-05 | -4.67 | RefSeq | FAM58A    | 1070   |

Online supplements are not copyedited prior to posting and the author(s) take full responsibility for the accuracy of all data.



|                            |      |    |          |       |        |              |        |
|----------------------------|------|----|----------|-------|--------|--------------|--------|
| chr16:22386546-22387343    | 798  | 23 | 4.85E-05 | -4.69 | ncRNA  | SMG1P1       | 30716  |
| chr10:46321812-46322350    | 539  | 12 | 4.85E-05 | -4.72 | ncRNA  | FAM35BP      | 4165   |
| chr7:72134877-72135546     | 670  | 19 | 4.04E-05 | -4.74 | ncRNA  | SPDYE8P      | 2700   |
| chr3:64649742-64650549     | 808  | 20 | 3.23E-05 | -4.75 | RefSeq | ADAMTS9      | -1336  |
| chr8:92151917-92152588     | 672  | 19 | 3.23E-05 | -4.76 | RefSeq | OTUD6B       | 317    |
| chr7:143679710-143680197   | 488  | 14 | 3.23E-05 | -4.76 | ncRNA  | OR2A1-AS1    | 3548   |
| chr5_h2_hap1:626640-627165 | 526  | 16 | 3.23E-05 | -4.77 | ncRNA  | SMA4         | 5613   |
| chr7:143526829-143527310   | 482  | 14 | 2.42E-05 | -4.79 | ncRNA  | LOC101928605 | 3482   |
| chr2:73867035-73867454     | 420  | 12 | 2.42E-05 | -4.79 | RefSeq | C2orf78      | 2211   |
| chr3:190986694-190987593   | 900  | 20 | 2.42E-05 | -4.85 | RefSeq | TP63         | 154784 |
| chr2:87589733-87590303     | 571  | 17 | 2.42E-05 | -4.86 | ncRNA  | LINC00152    | 53644  |
| chr17:36792212-36792764    | 553  | 16 | 2.42E-05 | -4.86 | RefSeq | KRT34        | -49    |
| chr16:28276611-28277085    | 475  | 14 | 2.42E-05 | -4.88 | RefSeq | NPIP6        | 4598   |
| chr5:172253049-172253643   | 595  | 15 | 2.42E-05 | -4.92 | RefSeq | ERGIC1       | 59220  |
| chr8:7871010-7871637       | 628  | 16 | 1.62E-05 | -4.95 | RefSeq | USP17L3      | 1281   |
| chr7:77370775-77371396     | 622  | 14 | 8.08E-06 | -4.98 | RefSeq | PHTF2        | 63392  |
| chr13:19621964-19622822    | 859  | 24 | 8.08E-06 | -5    | RefSeq | GJA3         | 10362  |
| chr16:29368415-29368963    | 549  | 15 | 8.08E-06 | -5.01 | ncRNA  | LOC606724    | 248    |
| chr7:74805232-74805841     | 610  | 18 | 8.08E-06 | -5.02 | ncRNA  | SPDYE8P      | 2736   |
| chr9:32977690-32978461     | 772  | 21 | 8.08E-06 | -5.03 | RefSeq | APTX         | 13179  |
| chr19:8951795-8952424      | 630  | 18 | 8.08E-06 | -5.04 | RefSeq | MUC16        | 595    |
| chr12:52710794-52711458    | 665  | 19 | 8.08E-06 | -5.04 | RefSeq | HOXC6        | 2333   |
| chr16:30160662-30161325    | 664  | 17 | 8.08E-06 | -5.05 | ncRNA  | LOC613037    | 3109   |
| chr16:70305676-70306366    | 691  | 19 | 8.08E-06 | -5.05 | RefSeq | PHLPP2       | 879    |
| chr1:29427712-29428275     | 564  | 16 | 8.08E-06 | -5.08 | RefSeq | MECR         | 1783   |
| chr11:4571383-4572309      | 927  | 26 | 8.08E-06 | -5.08 | RefSeq | OR52I1       | 0      |
| chr17:26676990-26677490    | 501  | 14 | 8.08E-06 | -5.11 | RefSeq | NF1          | 230919 |
| chr2:112957662-112958271   | 610  | 18 | 8.08E-06 | -5.11 | RefSeq | TTL          | 1448   |
| chr21:43795398-43796193    | 796  | 22 | 8.08E-06 | -5.12 | RefSeq | HSF2BP       | 107610 |
| chr17:3994012-3994804      | 793  | 20 | 8.08E-06 | -5.12 | RefSeq | CYB5D2       | 348    |
| chr5:52893848-52894499     | 652  | 18 | 8.08E-06 | -5.13 | RefSeq | NDUFS4       | 1626   |
| chr17:7540634-7541023      | 390  | 12 | 8.08E-06 | -5.13 | RefSeq | WRAP53       | 10520  |
| chr4:8958574-8960106       | 1533 | 40 | 8.08E-06 | -5.13 | RefSeq | USP17L25     | 0      |
| chr7:1084246-1085016       | 771  | 22 | 8.08E-06 | -5.15 | RefSeq | C7orf50      | 59404  |
| chr11:122974772-122975365  | 594  | 17 | 8.08E-06 | -5.16 | RefSeq | GRAMD1B      | 73218  |
| chr2:67479271-67480097     | 827  | 24 | 8.08E-06 | -5.17 | RefSeq | ETAA1        | 1325   |
| chr4:8963612-8964816       | 1205 | 31 | 8.08E-06 | -5.17 | RefSeq | USP17L25     | 0      |
| chr12:119036609-119037389  | 781  | 22 | 8.08E-06 | -5.17 | RefSeq | RAB35        | 1638   |
| chr4:166426371-166426974   | 604  | 17 | 8.08E-06 | -5.17 | RefSeq | KLHL2        | 75750  |



|                          |      |    |          |       |        |              |        |
|--------------------------|------|----|----------|-------|--------|--------------|--------|
| chr7:101981652-101982330 | 679  | 19 | 8.08E-06 | -5.17 | RefSeq | SPDYE2       | 2874   |
| chrX:49207087-49207665   | 579  | 17 | 8.08E-06 | -5.17 | RefSeq | GAGE12F      | 4285   |
| chr7:101588665-101589548 | 884  | 25 | 8.08E-06 | -5.19 | RefSeq | CUX1         | 342761 |
| chr19:12049055-12049613  | 559  | 16 | 8.08E-06 | -5.22 | RefSeq | ZNF844       | 12509  |
| chr16:14937943-14938425  | 483  | 14 | 8.08E-06 | -5.22 | RefSeq | NPIPA1       | -376   |
| chr3:195653574-195654080 | 507  | 15 | 8.08E-06 | -5.23 | RefSeq | ATP13A3      | 16178  |
| chr9:44942433-44943477   | 1045 | 25 | 8.08E-06 | -5.23 | ncRNA  | LOC102723709 | 1810   |
| chr19:57996669-57997255  | 587  | 17 | 8.08E-06 | -5.25 | RefSeq | ZNF28        | 19480  |
| chr2:224607729-224608251 | 523  | 15 | 8.08E-06 | -5.26 | RefSeq | SERPINE2     | 4030   |
| chr16:1597053-1597638    | 586  | 17 | 8.08E-06 | -5.27 | RefSeq | IFT140       | 4473   |
| chr4:8954158-8955180     | 1023 | 26 | 8.08E-06 | -5.29 | RefSeq | USP17L25     | 0      |
| chr20:25728433-25729326  | 894  | 22 | 8.08E-06 | -5.3  | ncRNA  | FAM182B      | 602    |
| chr8:12474442-12475099   | 658  | 19 | 8.08E-06 | -5.31 | ncRNA  | LOC729732    | 92393  |
| chr15:19001513-19002108  | 596  | 14 | 8.08E-06 | -5.31 | RefSeq | GOLGA6L6     | 5021   |
| chrX:49069698-49070274   | 577  | 17 | 8.08E-06 | -5.35 | RefSeq | GAGE12J      | 4245   |
| chr20:3840550-3841296    | 747  | 21 | 8.08E-06 | -5.38 | RefSeq | PANK2        | 23064  |
| chr16:30165093-30165926  | 834  | 24 | 8.08E-06 | -5.38 | ncRNA  | LOC613037    | -659   |
| chr16:2529373-2530011    | 639  | 18 | 8.08E-06 | -5.42 | RefSeq | PDPK1        | 1407   |
| chr7:74779567-74780409   | 843  | 24 | 8.08E-06 | -5.43 | ncRNA  | SPDYE8P      | 5098   |
| chr16:22446368-22446970  | 603  | 18 | 8.08E-06 | -5.44 | RefSeq | NPIP5        | 14023  |
| chr15:48846611-48847254  | 644  | 19 | 8.08E-06 | -5.44 | RefSeq | SPPL2A       | -1408  |
| chr10:45411212-45411849  | 638  | 18 | 8.08E-06 | -5.45 | RefSeq | 42071        | -851   |
| chr17:9507973-9508510    | 538  | 12 | 8.08E-06 | -5.45 | RefSeq | USP43        | 18394  |
| chr8:27520073-27520407   | 335  | 10 | 8.08E-06 | -5.46 | RefSeq | CLU          | 7839   |
| chr16:14751309-14751795  | 487  | 14 | 8.08E-06 | -5.5  | RefSeq | NPIPA3       | -376   |
| chr1:144016867-144017565 | 699  | 19 | 8.08E-06 | -5.54 | RefSeq | NBPF12       | 711915 |
| chr16:30150024-30150672  | 649  | 19 | 8.08E-06 | -5.55 | ncRNA  | LOC613037    | 13762  |
| chr21:44661694-44662362  | 669  | 18 | 8.08E-06 | -5.61 | RefSeq | TRPM2        | 63782  |
| chr19:11187013-11187745  | 733  | 21 | 8.08E-06 | -5.65 | RefSeq | DOCK6        | 46424  |
| chr7:143620357-143621167 | 811  | 22 | 8.08E-06 | -5.73 | ncRNA  | LOC101928605 | 97010  |
| chr16:30145614-30146327  | 714  | 20 | 8.08E-06 | -6.01 | ncRNA  | LOC613037    | 18107  |
| chr1:93316250-93316886   | 637  | 18 | 8.08E-06 | -6.06 | RefSeq | MTF2         | -494   |
| chr1:244204571-244206821 | 2251 | 51 | 8.08E-06 | -6.07 | RefSeq | SMYD3        | 530447 |
| chr16:22450720-22451359  | 640  | 18 | 8.08E-06 | -6.07 | RefSeq | NPIP5        | 18375  |
| chr1:31121926-31122834   | 909  | 25 | 8.08E-06 | -6.08 | RefSeq | SDC3         | 31234  |
| chr18:42807034-42807795  | 762  | 19 | 8.08E-06 | -6.1  | RefSeq | KATNAL2      | 26249  |
| chr8:7178278-7179293     | 1016 | 26 | 8.08E-06 | -6.13 | RefSeq | USP17L1      | 959    |
| chr5:69535062-69535636   | 575  | 13 | 8.08E-06 | -6.14 | ncRNA  | SMA4         | 21743  |
| chr1:144030100-144031194 | 1095 | 29 | 8.08E-06 | -6.15 | RefSeq | NBPF12       | 725148 |

Online supplements are not copyedited prior to posting and the author(s) take full responsibility for the accuracy of all data.



# CHEST<sup>®</sup> Online Supplement

|                          |      |    |          |       |        |          |        |
|--------------------------|------|----|----------|-------|--------|----------|--------|
| chr20:61981012-61982307  | 1296 | 36 | 8.08E-06 | -6.17 | RefSeq | TPD52L2  | 13987  |
| chr7:99744290-99744954   | 665  | 19 | 8.08E-06 | -6.18 | RefSeq | SPDYE3   | 1029   |
| chr5:69533183-69533708   | 526  | 16 | 8.08E-06 | -6.22 | ncRNA  | SMA4     | 23671  |
| chr4:8973243-8974307     | 1065 | 27 | 8.08E-06 | -6.23 | RefSeq | USP17L25 | 0      |
| chr7:66383574-66384230   | 657  | 18 | 8.08E-06 | -6.23 | ncRNA  | PMS2P4   | 20635  |
| chr4:8970088-8971284     | 1197 | 32 | 8.08E-06 | -6.32 | RefSeq | USP17L10 | 881    |
| chr5:70122606-70123134   | 529  | 15 | 8.08E-06 | -6.42 | ncRNA  | SMA4     | 71091  |
| chr16:16349723-16350468  | 746  | 21 | 8.08E-06 | -7.14 | ncRNA  | PKD1P1   | 30756  |
| chr18:42801111-42801880  | 770  | 19 | 8.08E-06 | -7.26 | RefSeq | KATNAL2  | 20326  |
| chrX:49235747-49236325   | 579  | 17 | 8.08E-06 | -7.48 | RefSeq | GAGE12C  | 4251   |
| chr4:8974870-8976030     | 1161 | 31 | 8.08E-06 | -7.48 | RefSeq | USP17L25 | 917    |
| chr7:102082410-102083101 | 692  | 19 | 8.08E-06 | -7.49 | RefSeq | SPDYE2   | 4402   |
| chr4:8960200-8961794     | 1595 | 43 | 8.08E-06 | -7.65 | RefSeq | USP17L25 | 483    |
| chr22:45891632-45892379  | 748  | 21 | 8.08E-06 | -7.97 | RefSeq | TBC1D22A | 354454 |
| chr4:8955853-8957049     | 1197 | 32 | 8.08E-06 | -8.06 | RefSeq | USP17L25 | 881    |
| chr4:8965343-8966539     | 1197 | 32 | 8.08E-06 | -8.25 | RefSeq | USP17L25 | 881    |
| chr5:70120678-70121268   | 591  | 14 | 8.08E-06 | -8.94 | ncRNA  | SMA4     | 69163  |

**e-Table 4:** Gene-associated DMRs between PRE and POST groups.

| Coordinates               | Length | # probes | p-value  | MAT-score | Transcript type | Gene symbol | Distance to TSS |
|---------------------------|--------|----------|----------|-----------|-----------------|-------------|-----------------|
| chr18:75725595-75727061   | 1467   | 40       | 8.08E-06 | 6.34      | RefSeq          | KCNG2       | 939             |
| chr11:111248820-111249661 | 842    | 24       | 8.08E-06 | 6.1       | RefSeq          | ALG9        | -1304           |
| chr17:77910324-77911148   | 825    | 18       | 8.08E-06 | 6.04      | RefSeq          | TEX19       | 0               |
| chr22:48948622-48949878   | 1257   | 34       | 8.08E-06 | 5.52      | RefSeq          | PANX2       | -1409           |
| chr9:72218932-72219646    | 715    | 20       | 8.08E-06 | 5.35      | RefSeq          | KLF9        | 0               |
| chr1:55277778-55278666    | 889    | 22       | 8.08E-06 | 5.31      | RefSeq          | PCSK9       | 41              |
| chr19:7008172-7009009     | 838    | 25       | 8.08E-06 | 5.3       | RefSeq          | MBD3L3      | 637             |
| chr11:2881744-2882577     | 834    | 19       | 8.08E-06 | 5.23      | RefSeq          | SLC22A18    | 1656            |
| chr17:35097485-35098366   | 882    | 25       | 8.08E-06 | 5.21      | RefSeq          | ERBB2       | 0               |
| chr12:113329046-113329897 | 852    | 24       | 8.08E-06 | 5.11      | RefSeq          | TBX5        | 734             |
| chr2:72997421-72998042    | 622    | 17       | 8.08E-06 | 5.11      | RefSeq          | EMX1        | -70             |
| chr15:98914126-98916379   | 2254   | 59       | 8.08E-06 | 5.07      | ncRNA           | PRKXP1      | 633             |
| chr8:347618-348380        | 763    | 22       | 8.08E-06 | 5.04      | RefSeq          | FBXO25      | 810             |
| chr9:139186433-139187221  | 789    | 20       | 8.08E-06 | 5.04      | RefSeq          | TMEM210     | -113            |
| chr7:27172252-27172907    | 656    | 19       | 8.08E-06 | 5.01      | RefSeq          | HOXA9       | -577            |
| chr17:23901780-23902431   | 652    | 16       | 8.08E-06 | 5.01      | RefSeq          | UNC119      | 1343            |
| chr2:46600411-46601179    | 769    | 22       | 1.62E-05 | 4.95      | RefSeq          | ATP6V1E2    | 0               |
| chr3:46717877-46718651    | 775    | 22       | 1.62E-05 | 4.79      | RefSeq          | TMIE        | 50              |
| chr19:58387162-58387770   | 609    | 18       | 2.42E-05 | 4.74      | RefSeq          | ZNF665      | 662             |
| chr10:44817627-44818496   | 870    | 25       | 2.42E-05 | 4.73      | RefSeq          | C10orf25    | -1150           |
| chr4:104161782-104162598  | 817    | 23       | 3.23E-05 | 4.72      | RefSeq          | SLC9B1      | -1436           |
| chr17:52345523-52346023   | 501    | 14       | 3.23E-05 | 4.71      | RefSeq          | TRIM25      | 386             |
| chr5:55564379-55564956    | 578    | 16       | 4.04E-05 | 4.69      | RefSeq          | ANKRD55     | 0               |
| chr5:147422468-147423134  | 667    | 18       | 4.04E-05 | 4.68      | RefSeq          | SPINK5      | -594            |
| chr14:100362766-100363624 | 859    | 24       | 4.85E-05 | 4.67      | ncRNA           | MEG3        | 568             |
| chr15:32180417-32181036   | 620    | 18       | 4.85E-05 | 4.67      | RefSeq          | EMC7        | 310             |
| chr1:156230180-156230748  | 569    | 16       | 5.65E-05 | 4.65      | RefSeq          | KIRREL      | 493             |
| chr6:50895875-50896502    | 628    | 16       | 5.65E-05 | 4.65      | RefSeq          | TFAP2B      | 1477            |
| chr15:83325685-83326229   | 545    | 14       | 5.65E-05 | 4.64      | RefSeq          | PDE8A       | 937             |
| chr11:124485958-124486529 | 572    | 16       | 5.65E-05 | 4.63      | RefSeq          | TMEM218     | 286             |
| chr5:14195580-14196164    | 585    | 16       | 5.65E-05 | 4.62      | RefSeq          | TRIO        | -665            |
| chr14:24115524-24116329   | 806    | 23       | 6.46E-05 | 4.62      | RefSeq          | CTSG        | -217            |
| chr7:86617609-86618187    | 579    | 16       | 6.46E-05 | 4.61      | RefSeq          | DMTF1       | -1426           |
| chr17:18069275-18069786   | 512    | 11       | 6.46E-05 | 4.58      | RefSeq          | LLGL1       | 0               |
| chrX:70280593-70281363    | 771    | 22       | 7.27E-05 | 4.57      | RefSeq          | NLGN3       | -43             |
| chr4:109312508-109313093  | 586    | 17       | 8.08E-05 | 4.56      | ncRNA           | LEF1-AS1    | 0               |

|                           |     |    |          |      |        |          |       |
|---------------------------|-----|----|----------|------|--------|----------|-------|
| chr8:95974250-95974863    | 614 | 18 | 8.89E-05 | 4.56 | RefSeq | CCNE2    | 1796  |
| chr19:10807192-10807762   | 571 | 16 | 9.69E-05 | 4.56 | RefSeq | TMED1    | 222   |
| chr17:37792928-37793757   | 830 | 23 | 9.69E-05 | 4.55 | RefSeq | STAT3    | 283   |
| chr20:62266436-62267027   | 592 | 17 | 1.05E-04 | 4.52 | RefSeq | MYT1     | 165   |
| chr13:45523147-45523702   | 556 | 16 | 1.05E-04 | 4.51 | RefSeq | ZC3H13   | 1196  |
| chr6:32481602-32482408    | 807 | 22 | 1.05E-04 | 4.51 | RefSeq | BTNL2    | 471   |
| chr8:125532040-125532675  | 636 | 18 | 1.13E-04 | 4.49 | RefSeq | TRMT12   | 0     |
| chr6:35803227-35803838    | 612 | 18 | 1.13E-04 | 4.49 | RefSeq | FKBP5    | 501   |
| chr12:16391275-16391910   | 636 | 18 | 1.29E-04 | 4.47 | RefSeq | MGST1    | 0     |
| chr20:13921702-13922422   | 721 | 20 | 1.29E-04 | 4.46 | ncRNA  | SEL1L2   | 1558  |
| chr1:159367892-159368526  | 635 | 18 | 1.29E-04 | 4.44 | RefSeq | DEDD     | 577   |
| chr7:79978606-79979120    | 515 | 14 | 1.29E-04 | 4.43 | RefSeq | GNAT3    | 59    |
| chr3:127904943-127905653  | 711 | 20 | 1.29E-04 | 4.43 | RefSeq | CHCHD6   | -100  |
| chr11:61315987-61316672   | 686 | 19 | 1.29E-04 | 4.43 | RefSeq | FEN1     | -13   |
| chr3:130203764-130204448  | 685 | 20 | 1.29E-04 | 4.42 | RefSeq | EFCC1    | 602   |
| chr1:120415201-120415876  | 676 | 19 | 1.29E-04 | 4.42 | RefSeq | NOTCH2   | -1360 |
| chr8:131019094-131019923  | 830 | 23 | 1.37E-04 | 4.41 | RefSeq | FAM49B   | 1378  |
| chr4:187350186-187350767  | 582 | 16 | 1.37E-04 | 4.4  | RefSeq | CYP4V2   | 518   |
| chr12:116023515-116024039 | 525 | 15 | 1.37E-04 | 4.4  | ncRNA  | TESC-AS1 | 1860  |
| chr1:102085108-102085698  | 591 | 16 | 1.45E-04 | 4.39 | RefSeq | OLFM3    | 0     |
| chr14:88327188-88327795   | 608 | 17 | 1.45E-04 | 4.39 | RefSeq | EML5     | 1055  |
| chr1:201587156-201587695  | 540 | 12 | 1.45E-04 | 4.39 | RefSeq | FMOD     | 0     |
| chr4:77152550-77153171    | 622 | 18 | 1.53E-04 | 4.38 | RefSeq | ART3     | 1193  |
| chr19:7647341-7647940     | 600 | 18 | 1.53E-04 | 4.37 | RefSeq | MCEMP1   | -3    |
| chr3:125295211-125295823  | 613 | 14 | 1.70E-04 | 4.37 | RefSeq | KALRN    | -425  |
| chr9:131636807-131637307  | 501 | 15 | 1.78E-04 | 4.36 | RefSeq | USP20    | -210  |
| chr2:128284444-128284960  | 517 | 15 | 1.78E-04 | 4.36 | RefSeq | WDR33    | 272   |
| chr12:119117013-119117590 | 578 | 16 | 1.78E-04 | 4.36 | RefSeq | GCN1L1   | -116  |
| chr3:44259790-44260366    | 577 | 16 | 1.86E-04 | 4.36 | RefSeq | TOPAZ1   | 1408  |
| chr17:2915143-2915737     | 595 | 17 | 1.86E-04 | 4.36 | RefSeq | OR1D5    | -1491 |
| chr2:217205308-217205845  | 538 | 15 | 1.86E-04 | 4.36 | RefSeq | IGFBP2   | -527  |
| chr19:53866440-53867202   | 763 | 21 | 2.02E-04 | 4.34 | RefSeq | NTN5     | 875   |
| chr4:141483934-141484580  | 647 | 15 | 2.02E-04 | 4.34 | RefSeq | SCOC     | 0     |
| chr10:74683255-74683882   | 628 | 18 | 2.02E-04 | 4.34 | RefSeq | MRPS16   | -797  |
| chr11:101827602-101828261 | 660 | 19 | 2.02E-04 | 4.33 | RefSeq | TMEM123  | 725   |
| chr8:96351025-96351839    | 815 | 19 | 2.02E-04 | 4.33 | RefSeq | C8orf37  | -386  |
| chr17:61731217-61731820   | 604 | 17 | 2.02E-04 | 4.33 | RefSeq | PRKCA    | 1829  |
| chr9:38413606-38414103    | 498 | 14 | 2.02E-04 | 4.33 | RefSeq | IGFBPL1  | 342   |
| chr10:70330227-70330907   | 681 | 14 | 2.02E-04 | 4.32 | RefSeq | DDX50    | -133  |



|                          |     |    |          |      |        |           |       |
|--------------------------|-----|----|----------|------|--------|-----------|-------|
| chr4:141663390-141663906 | 517 | 15 | 2.02E-04 | 4.32 | RefSeq | ELMOD2    | -856  |
| chr5:112283649-112284171 | 523 | 14 | 2.02E-04 | 4.31 | RefSeq | REEP5     | 1760  |
| chr17:44007445-44008019  | 575 | 16 | 2.02E-04 | 4.31 | RefSeq | HOXB3     | -635  |
| chr3:89237532-89238125   | 594 | 17 | 2.02E-04 | 4.31 | RefSeq | EPHA3     | -1239 |
| chr1:110975779-110976589 | 811 | 22 | 2.02E-04 | 4.31 | RefSeq | KCNA2     | -159  |
| chr2:3362888-3363402     | 515 | 11 | 2.02E-04 | 4.31 | RefSeq | TRAPPC12  | 435   |
| chr5:86742542-86743246   | 705 | 20 | 2.02E-04 | 4.31 | RefSeq | CCNH      | 1232  |
| chr3:8787041-8787708     | 668 | 16 | 2.02E-04 | 4.31 | RefSeq | OXTR      | -740  |
| chr4:30330498-30331095   | 598 | 14 | 2.02E-04 | 4.31 | RefSeq | PCDH7     | -40   |
| chr12:9776758-9777310    | 553 | 16 | 2.02E-04 | 4.3  | RefSeq | CLECL1    | 0     |
| chr6:168220260-168220775 | 516 | 14 | 2.02E-04 | 4.3  | RefSeq | FRMD1     | -864  |
| chr1:158268658-158269224 | 567 | 13 | 2.02E-04 | 4.3  | RefSeq | PIGM      | -250  |
| chr1:111735264-111735964 | 701 | 18 | 2.02E-04 | 4.3  | ncRNA  | PGCP1     | -1267 |
| chr14:22946829-22947377  | 549 | 16 | 2.10E-04 | 4.29 | RefSeq | MYH6      | 0     |
| chr19:14798232-14798886  | 655 | 18 | 2.10E-04 | 4.29 | RefSeq | OR7A5     | 1391  |
| chr11:626516-627152      | 637 | 17 | 2.10E-04 | 4.29 | RefSeq | DRD4      | -153  |
| chrX:152792974-152793687 | 714 | 20 | 2.18E-04 | 4.29 | RefSeq | L1CAM     | 1008  |
| chr6:142508442-142508957 | 516 | 12 | 2.18E-04 | 4.28 | RefSeq | VTA1      | -1035 |
| chr7:158341993-158342504 | 512 | 15 | 2.26E-04 | 4.28 | RefSeq | WDR60     | 0     |
| chr8:58355077-58355831   | 755 | 21 | 2.42E-04 | 4.27 | ncRNA  | LINC00588 | 421   |
| chr21:39738942-39739541  | 600 | 17 | 2.42E-04 | 4.27 | RefSeq | SH3BGR    | -126  |
| chr2:87830043-87830562   | 520 | 15 | 2.42E-04 | 4.27 | RefSeq | PLGLB1    | 1318  |
| chr2:20113420-20114124   | 705 | 20 | 2.42E-04 | 4.26 | RefSeq | LAPTM4A   | 1147  |
| chr16:31178628-31179349  | 722 | 18 | 2.42E-04 | 4.26 | RefSeq | ITGAM     | 0     |
| chr16:1930831-1931656    | 826 | 24 | 2.50E-04 | 4.26 | RefSeq | MSRB1     | 1640  |
| chr17:15844991-15845790  | 800 | 20 | 2.67E-04 | 4.26 | RefSeq | ZSWIM7    | -1259 |
| chr1:173112099-173112788 | 690 | 20 | 2.67E-04 | 4.26 | RefSeq | RABGAP1L  | 820   |
| chr11:45071541-45072027  | 487 | 12 | 2.75E-04 | 4.25 | ncRNA  | PRDM11    | -113  |
| chrX:26143987-26144586   | 600 | 17 | 2.91E-04 | 4.25 | RefSeq | MAGEB5    | 0     |
| chr1:114103241-114103871 | 631 | 17 | 2.91E-04 | 4.25 | RefSeq | PHTF1     | 0     |
| chrX:134884972-134885636 | 665 | 19 | 2.91E-04 | 4.25 | RefSeq | MMGT1     | -1171 |
| chr12:11353513-11354131  | 619 | 17 | 2.91E-04 | 4.25 | RefSeq | PRB4      | 506   |
| chr19:60361754-60362377  | 624 | 18 | 2.91E-04 | 4.24 | RefSeq | TNNI3     | -841  |
| chr17:75367992-75368531  | 540 | 15 | 2.91E-04 | 4.24 | RefSeq | CBX2      | 1420  |
| chr1:205696237-205696739 | 503 | 11 | 2.91E-04 | 4.24 | RefSeq | CR2       | 1969  |
| chr22:19697957-19698496  | 540 | 16 | 2.91E-04 | 4.23 | RefSeq | P2RX6     | -946  |
| chr3:52064416-52064947   | 532 | 16 | 2.91E-04 | 4.23 | RefSeq | DUSP7     | 555   |
| chr7:139122919-139123416 | 498 | 15 | 2.91E-04 | 4.23 | RefSeq | HIPK2     | 747   |
| chrX:41433822-41434476   | 655 | 18 | 2.91E-04 | 4.23 | RefSeq | GPR34     | 652   |

Online supplements are not copyedited prior to posting and the author(s) take full responsibility for the accuracy of all data.



|                           |     |    |          |      |        |           |       |
|---------------------------|-----|----|----------|------|--------|-----------|-------|
| chr3:197118841-197119420  | 580 | 17 | 2.99E-04 | 4.23 | RefSeq | TNK2      | 858   |
| chr19:55999590-56000145   | 556 | 16 | 3.07E-04 | 4.22 | RefSeq | C19orf48  | 0     |
| chr13:40452845-40453337   | 493 | 13 | 3.15E-04 | 4.21 | RefSeq | ELF1      | 1082  |
| chr19:40534735-40535226   | 492 | 13 | 3.15E-04 | 4.21 | RefSeq | FFAR1     | 450   |
| chr1:202448402-202448923  | 522 | 15 | 3.15E-04 | 4.21 | RefSeq | GOLT1A    | 921   |
| chr2:132890677-132891225  | 549 | 15 | 3.15E-04 | 4.21 | RefSeq | GPR39     | 60    |
| chr17:53759381-53760270   | 890 | 25 | 3.15E-04 | 4.2  | RefSeq | BZRAP1    | 882   |
| chr16:55261543-55262144   | 602 | 17 | 3.15E-04 | 4.2  | RefSeq | MT1H      | 316   |
| chr1:7835644-7836156      | 513 | 15 | 3.15E-04 | 4.2  | RefSeq | UTS2      | 0     |
| chr15:90737238-90737722   | 485 | 13 | 3.15E-04 | 4.19 | RefSeq | ST8SIA2   | -422  |
| chr18:28305386-28305864   | 479 | 12 | 3.15E-04 | 4.19 | RefSeq | GAREM     | -940  |
| chr10:61571876-61572395   | 520 | 15 | 3.23E-04 | 4.19 | RefSeq | ANK3      | -1095 |
| chr15:75499634-75500291   | 658 | 19 | 3.31E-04 | 4.19 | RefSeq | HMG20A    | -7    |
| chr14:60517942-60518558   | 617 | 18 | 3.39E-04 | 4.19 | RefSeq | SLC38A6   | 357   |
| chrX:57164360-57164951    | 592 | 16 | 3.47E-04 | 4.19 | RefSeq | SPIN2B    | 0     |
| chr9:21219621-21220229    | 609 | 17 | 3.47E-04 | 4.18 | RefSeq | IFNA17    | -1399 |
| chr22:45402065-45402606   | 542 | 17 | 3.47E-04 | 4.18 | RefSeq | GRAMD4    | 743   |
| chr5:172688513-172689023  | 511 | 14 | 3.47E-04 | 4.18 | RefSeq | STC2      | 90    |
| chr9:94471489-94472075    | 587 | 16 | 3.47E-04 | 4.18 | RefSeq | IPPK      | 294   |
| chr20:43029178-43029668   | 491 | 14 | 3.64E-04 | 4.17 | RefSeq | STK4      | 644   |
| chr9:42009000-42009518    | 519 | 14 | 3.64E-04 | 4.17 | ncRNA  | KGFLP2    | 67    |
| chrX:86659146-86659680    | 535 | 15 | 3.72E-04 | 4.17 | RefSeq | KLHL4     | 0     |
| chr9:135315024-135315555  | 532 | 13 | 3.72E-04 | 4.17 | RefSeq | CACFD1    | 116   |
| chr9:86472391-86472924    | 534 | 15 | 3.72E-04 | 4.17 | RefSeq | NTRK2     | -1491 |
| chr1:109851420-109851969  | 550 | 16 | 3.72E-04 | 4.17 | RefSeq | AMIGO1    | 1891  |
| chr11:65303829-65304330   | 502 | 15 | 3.72E-04 | 4.16 | RefSeq | AP5B1     | 309   |
| chrX:10762861-10763610    | 750 | 17 | 3.72E-04 | 4.16 | RefSeq | MID1      | -1130 |
| chr5:36640647-36641180    | 534 | 15 | 3.72E-04 | 4.16 | RefSeq | SLC1A3    | -1034 |
| chr9:103542018-103542599  | 582 | 17 | 3.72E-04 | 4.16 | RefSeq | GRIN3A    | -1334 |
| chr1:154449301-154449787  | 487 | 14 | 3.72E-04 | 4.15 | RefSeq | PMF1      | 0     |
| chr1:19795766-19796287    | 522 | 16 | 3.72E-04 | 4.15 | RefSeq | MINOS1    | 0     |
| chr19:15612230-15612750   | 521 | 14 | 3.72E-04 | 4.15 | RefSeq | CYP4F3    | 0     |
| chr5:61735065-61735795    | 731 | 20 | 3.72E-04 | 4.15 | RefSeq | DIMT1     | 0     |
| chr20:33462295-33462958   | 664 | 14 | 3.72E-04 | 4.15 | RefSeq | UQCC1     | 402   |
| chrX:68317487-68318204    | 718 | 21 | 3.80E-04 | 4.15 | ncRNA  | LINC00269 | 1362  |
| chr12:49705088-49705584   | 497 | 10 | 3.80E-04 | 4.15 | RefSeq | SLC11A2   | 883   |
| chr4:69851139-69851925    | 787 | 21 | 3.80E-04 | 4.15 | RefSeq | UGT2A3    | 174   |
| chr3:123034870-123035390  | 521 | 15 | 3.80E-04 | 4.15 | RefSeq | IQCB1     | 1227  |
| chr10:103103897-103104410 | 514 | 15 | 3.80E-04 | 4.14 | RefSeq | BTRC      | 117   |

Online supplements are not copyedited prior to posting and the author(s) take full responsibility for the accuracy of all data.

|                           |     |    |          |      |        |            |       |
|---------------------------|-----|----|----------|------|--------|------------|-------|
| chr2:27968622-27968986    | 365 | 11 | 3.80E-04 | 4.14 | RefSeq | BRE        | 1636  |
| chr10:105026228-105026782 | 555 | 16 | 3.88E-04 | 4.14 | RefSeq | INA        | -128  |
| chr11:95164442-95165033   | 592 | 17 | 3.88E-04 | 4.14 | RefSeq | CEP57      | 1169  |
| chr8:144171620-144172275  | 656 | 19 | 3.88E-04 | 4.14 | RefSeq | LY6E       | 343   |
| chr14:44676764-44677252   | 489 | 14 | 3.88E-04 | 4.14 | RefSeq | FANCM      | 1878  |
| chr11:3211540-3212316     | 777 | 22 | 3.88E-04 | 4.14 | RefSeq | MRGPRE     | -1347 |
| chr6:44234228-44235124    | 897 | 24 | 3.96E-04 | 4.14 | RefSeq | CAPN11     | 0     |
| chr4:1273552-1274066      | 515 | 12 | 3.96E-04 | 4.14 | RefSeq | MAEA       | 0     |
| chr3:26639863-26640589    | 727 | 21 | 3.96E-04 | 4.13 | RefSeq | LRRC3B     | 559   |
| chr4:184660849-184661467  | 619 | 16 | 3.96E-04 | 4.13 | ncRNA  | LOC389247  | 1196  |
| chr14:89597066-89597858   | 793 | 21 | 3.96E-04 | 4.13 | RefSeq | KCNK13     | -4    |
| chr9:113326547-113327270  | 724 | 21 | 3.96E-04 | 4.13 | RefSeq | ZNF483     | 0     |
| chr4:106692403-106693017  | 615 | 18 | 3.96E-04 | 4.13 | RefSeq | ARHGEF38   | -209  |
| chr1:42158524-42159016    | 493 | 13 | 3.96E-04 | 4.12 | ncRNA  | HIVEP3     | -1440 |
| chr6:124000539-124001095  | 557 | 16 | 3.96E-04 | 4.12 | RefSeq | TRDN       | -601  |
| chr8:143819866-143820432  | 567 | 17 | 3.96E-04 | 4.12 | RefSeq | SLURP1     | 400   |
| chr17:37143657-37144264   | 608 | 17 | 3.96E-04 | 4.12 | RefSeq | HAP1       | 161   |
| chr20:3695485-3695859     | 375 | 11 | 3.96E-04 | 4.12 | RefSeq | C20orf27   | 594   |
| chr5:148188191-148188822  | 632 | 18 | 3.96E-04 | 4.12 | RefSeq | ADRB2      | 1842  |
| chr11:4858573-4859105     | 533 | 15 | 3.96E-04 | 4.12 | RefSeq | OR51T1     | -520  |
| chr22:16769606-16770250   | 645 | 19 | 3.96E-04 | 4.12 | RefSeq | MICAL3     | 0     |
| chr6:117694685-117695252  | 568 | 16 | 3.96E-04 | 4.12 | RefSeq | VGLL2      | 1271  |
| chr7:148591920-148592574  | 655 | 19 | 3.96E-04 | 4.12 | RefSeq | ZNF783     | 1725  |
| chr4:147778661-147779256  | 596 | 16 | 3.96E-04 | 4.12 | RefSeq | POU4F2     | -239  |
| chrX:78508537-78509066    | 530 | 15 | 3.96E-04 | 4.11 | RefSeq | ITM2A      | 640   |
| chr6:55846016-55846516    | 501 | 13 | 4.04E-04 | 4.11 | RefSeq | BMP5       | 1819  |
| chr19:59735640-59736261   | 622 | 17 | 4.04E-04 | 4.11 | ncRNA  | KIR3DX1    | 0     |
| chr20:14264174-14264708   | 535 | 15 | 4.04E-04 | 4.11 | RefSeq | FLRT3      | 1606  |
| chr3:159311175-159311841  | 667 | 19 | 4.04E-04 | 4.11 | RefSeq | RSRC1      | 640   |
| chr12:10657295-10657986   | 692 | 19 | 4.04E-04 | 4.11 | RefSeq | MAGOHB     | -450  |
| chr17:24014352-24014927   | 576 | 16 | 4.04E-04 | 4.11 | RefSeq | SUPT6H     | 923   |
| chr6:147564767-147565506  | 740 | 19 | 4.04E-04 | 4.11 | ncRNA  | STXBP5-AS1 | 1938  |
| chr10:111673758-111674297 | 540 | 16 | 4.12E-04 | 4.1  | RefSeq | XPNPEP1    | -456  |
| chr1:156491827-156492393  | 567 | 16 | 4.12E-04 | 4.1  | RefSeq | CD1A       | 1276  |
| chr11:87710342-87710914   | 573 | 15 | 4.12E-04 | 4.1  | RefSeq | CTSC       | 0     |
| chr12:12763326-12764142   | 817 | 23 | 4.12E-04 | 4.1  | RefSeq | CDKN1B     | 1855  |
| chr17:55325558-55326055   | 498 | 14 | 4.12E-04 | 4.1  | RefSeq | TUBD1      | -469  |
| chr12:21699823-21700341   | 519 | 15 | 4.12E-04 | 4.1  | RefSeq | LDHB       | 1655  |
| chr6:49711535-49712056    | 522 | 15 | 4.12E-04 | 4.09 | RefSeq | RHAG       | 491   |





|                          |     |    |          |      |        |            |       |
|--------------------------|-----|----|----------|------|--------|------------|-------|
| chr11:65858859-65859463  | 605 | 17 | 4.12E-04 | 4.09 | RefSeq | RIN1       | 1114  |
| chrX:119380743-119381242 | 500 | 15 | 4.12E-04 | 4.09 | RefSeq | ATP1B4     | 775   |
| chr10:98019171-98019958  | 788 | 22 | 4.12E-04 | 4.09 | RefSeq | BLNK       | 1366  |
| chr12:81276917-81277423  | 507 | 15 | 4.20E-04 | 4.09 | RefSeq | CCDC59     | -586  |
| chr17:70100019-70100609  | 591 | 16 | 4.20E-04 | 4.08 | RefSeq | CD300LD    | -53   |
| chr7:45893848-45894427   | 580 | 17 | 4.20E-04 | 4.08 | RefSeq | IGFBP1     | -57   |
| chr17:43375823-43376342  | 520 | 12 | 4.20E-04 | 4.08 | RefSeq | PNPO       | 1935  |
| chr1:36700430-36700963   | 534 | 15 | 4.20E-04 | 4.08 | RefSeq | MRPS15     | 1665  |
| chr7:96490236-96490745   | 510 | 13 | 4.20E-04 | 4.08 | RefSeq | DLX5       | 1335  |
| chr19:6452143-6452682    | 540 | 16 | 4.28E-04 | 4.08 | RefSeq | TUBB4A     | 1178  |
| chr19:44083123-44083764  | 642 | 18 | 4.28E-04 | 4.08 | RefSeq | SIRT2      | -780  |
| chr1:148021425-148021938 | 514 | 15 | 4.28E-04 | 4.08 | RefSeq | FCGR1A     | 551   |
| chr15:39032271-39032798  | 528 | 14 | 4.28E-04 | 4.07 | RefSeq | CHAC1      | -130  |
| chr19:59541047-59541564  | 518 | 15 | 4.28E-04 | 4.07 | RefSeq | LILRA4     | 670   |
| chr1:247118324-247118909 | 586 | 16 | 4.28E-04 | 4.07 | RefSeq | ZNF692     | 840   |
| chr6:30018354-30018869   | 516 | 15 | 4.28E-04 | 4.07 | RefSeq | HLA-A      | 128   |
| chr8:6551463-6552000     | 538 | 15 | 4.28E-04 | 4.07 | RefSeq | AGPAT5     | -1286 |
| chr6:29663282-29663791   | 510 | 15 | 4.44E-04 | 4.07 | RefSeq | OR2H2      | 0     |
| chr19:842506-843348      | 843 | 23 | 4.44E-04 | 4.07 | RefSeq | MED16      | 871   |
| chr11:89179705-89180353  | 649 | 18 | 4.44E-04 | 4.07 | RefSeq | TRIM49     | 1039  |
| chr14:91575455-91576037  | 583 | 16 | 4.44E-04 | 4.07 | RefSeq | TRIP11     | 120   |
| chr6:119713857-119714442 | 586 | 16 | 4.52E-04 | 4.06 | RefSeq | MAN1A1     | -1226 |
| chr20:52526449-52526983  | 535 | 15 | 4.52E-04 | 4.06 | RefSeq | DOK5       | 1031  |
| chr17:55536128-55536739  | 612 | 18 | 4.60E-04 | 4.06 | ncRNA  | LOC653653  | -1065 |
| chr9:97119166-97119710   | 545 | 12 | 4.69E-04 | 4.05 | RefSeq | FANCC      | 103   |
| chr15:30694519-30695055  | 537 | 14 | 4.69E-04 | 4.05 | RefSeq | ARHGAP11A  | 0     |
| chr1:10994985-10995674   | 690 | 20 | 4.69E-04 | 4.05 | RefSeq | TARDBP     | 0     |
| chr1:203279081-203279638 | 558 | 16 | 4.69E-04 | 4.05 | RefSeq | CNTN2      | 118   |
| chr17:34575439-34576095  | 657 | 19 | 4.77E-04 | 4.05 | RefSeq | ARL5C      | 0     |
| chr17:1567431-1567937    | 507 | 15 | 4.77E-04 | 4.05 | RefSeq | WDR81      | 864   |
| chr4:47182116-47182762   | 647 | 19 | 4.77E-04 | 4.05 | RefSeq | ATP10D     | 0     |
| chr1:53159156-53159664   | 509 | 13 | 4.85E-04 | 4.04 | RefSeq | ECHDC2     | 371   |
| chr8:125250934-125251439 | 506 | 14 | 4.85E-04 | 4.04 | ncRNA  | FER1L6-AS2 | 1506  |
| chr4:54788673-54789247   | 575 | 17 | 4.85E-04 | 4.04 | RefSeq | PDGFRA     | -774  |
| chr12:48221186-48221832  | 647 | 15 | 4.85E-04 | 4.04 | RefSeq | KCNH3      | 1979  |
| chr3:157756232-157756728 | 497 | 14 | 4.93E-04 | 4.04 | RefSeq | SSR3       | -564  |
| chr1:42393011-42393457   | 447 | 13 | 4.93E-04 | 4.04 | RefSeq | GUCA2B     | 1332  |
| chr1:115124422-115124978 | 557 | 15 | 4.93E-04 | 4.04 | RefSeq | SIKE1      | 0     |
| chr2:42874740-42875273   | 534 | 15 | 4.93E-04 | 4.04 | RefSeq | HAAO       | -1484 |

Online supplements are not copyedited prior to posting and the author(s) take full responsibility for the accuracy of all data.



|                           |     |    |          |      |        |           |       |
|---------------------------|-----|----|----------|------|--------|-----------|-------|
| chr8:86537708-86538216    | 509 | 15 | 4.93E-04 | 4.04 | RefSeq | CA3       | -92   |
| chr7:77165053-77165642    | 590 | 17 | 4.93E-04 | 4.04 | RefSeq | RSBN1L    | 1374  |
| chr9:93161853-93162571    | 719 | 20 | 4.93E-04 | 4.03 | RefSeq | AUH       | 1457  |
| chr13:102515003-102515510 | 508 | 15 | 5.09E-04 | 4.03 | RefSeq | SLC10A2   | 1688  |
| chr15:33626709-33627262   | 554 | 14 | 5.09E-04 | 4.03 | RefSeq | DPH6      | -1012 |
| chr6:27886132-27886664    | 533 | 15 | 5.09E-04 | 4.03 | RefSeq | HIST1H3H  | 311   |
| chr12:5023488-5024237     | 750 | 22 | 5.09E-04 | 4.03 | RefSeq | KCNA5     | 142   |
| chr11:65117483-65118334   | 852 | 20 | 5.09E-04 | 4.03 | RefSeq | KCNK7     | 1710  |
| chr15:20636683-20637176   | 494 | 15 | 5.09E-04 | 4.03 | RefSeq | NIPA1     | 1109  |
| chr17:36348005-36348515   | 511 | 13 | 5.25E-04 | 4.02 | RefSeq | KRT23     | -583  |
| chr3:145174164-145174690  | 527 | 15 | 5.25E-04 | 4.02 | RefSeq | C3orf58   | -167  |
| chr5:147142755-147143369  | 615 | 17 | 5.33E-04 | 4.02 | RefSeq | JAKMIP2   | -150  |
| chr1:66990317-66990800    | 484 | 14 | 5.33E-04 | 4.02 | RefSeq | TCTEX1D1  | 0     |
| chr11:47154987-47155532   | 546 | 15 | 5.33E-04 | 4.02 | RefSeq | ARFGAP2   | 0     |
| chr16:85099168-85099830   | 663 | 19 | 5.33E-04 | 4.02 | ncRNA  | FENDRR    | 138   |
| chr5:179152284-179152771  | 488 | 14 | 5.33E-04 | 4.02 | RefSeq | LTC4S     | -821  |
| chr12:104249213-104249790 | 578 | 15 | 5.33E-04 | 4.02 | RefSeq | C12orf75  | 669   |
| chr8:87311339-87311853    | 515 | 14 | 5.33E-04 | 4.02 | RefSeq | SLC7A13   | 0     |
| chr19:55070824-55071322   | 499 | 14 | 5.33E-04 | 4.02 | RefSeq | AKT1S1    | 1135  |
| chr8:67253002-67253504    | 503 | 12 | 5.33E-04 | 4.02 | RefSeq | CRH       | 0     |
| chr18:8706170-8706706     | 537 | 15 | 5.33E-04 | 4.01 | RefSeq | MTCL1     | -663  |
| chr6:29120362-29120949    | 588 | 17 | 5.33E-04 | 4.01 | RefSeq | OR2W1     | 0     |
| chr18:59965509-59966000   | 492 | 14 | 5.33E-04 | 4.01 | ncRNA  | LINC00305 | 1241  |
| chr6:99904255-99904750    | 496 | 13 | 5.33E-04 | 4.01 | RefSeq | FAXC      | -2    |
| chr15:31326240-31326772   | 533 | 15 | 5.33E-04 | 4.01 | ncRNA  | TMCO5B    | 277   |
| chr10:95505728-95506264   | 537 | 15 | 5.41E-04 | 4.01 | RefSeq | LGI1      | -1292 |
| chr1:218769421-218770104  | 684 | 19 | 5.41E-04 | 4    | RefSeq | MARK1     | 1273  |
| chr1:210673606-210674174  | 569 | 14 | 5.41E-04 | 4    | RefSeq | NENF      | 754   |
| chr8:19839014-19839547    | 534 | 15 | 5.41E-04 | 4    | RefSeq | LPL       | -1315 |
| chr18:55718259-55718935   | 677 | 18 | 5.41E-04 | 4    | RefSeq | PMAIP1    | 87    |
| chr7:89712014-89712712    | 699 | 19 | 5.41E-04 | 4    | RefSeq | CFAP69    | 0     |
| chr6:2121367-2121873      | 507 | 11 | 5.41E-04 | 4    | RefSeq | GMDS      | -142  |
| chr6:111910063-111910690  | 628 | 16 | 5.41E-04 | 4    | RefSeq | REV3L     | 922   |
| chr12:94777043-94777789   | 747 | 22 | 5.49E-04 | 4    | RefSeq | SNRPF     | 203   |
| chr12:120724462-120724974 | 513 | 14 | 5.49E-04 | 4    | ncRNA  | LINC01089 | 800   |
| chr11:71501658-71502156   | 499 | 14 | 5.57E-04 | 4    | RefSeq | ANAPC15   | -187  |
| chr5:174355246-174355754  | 509 | 15 | 5.57E-04 | 4    | ncRNA  | FLJ16171  | 0     |
| chr1:16215629-16216260    | 632 | 17 | 5.74E-04 | 4    | RefSeq | HSPB7     | 1613  |
| chr11:59804665-59805155   | 491 | 15 | 5.74E-04 | 3.99 | RefSeq | MS4A4A    | 75    |

Online supplements are not copyedited prior to posting and the author(s) take full responsibility for the accuracy of all data.

|                           |     |    |          |      |        |           |       |
|---------------------------|-----|----|----------|------|--------|-----------|-------|
| chr3:166276538-166277034  | 497 | 10 | 5.74E-04 | 3.99 | RefSeq | SI        | 1944  |
| chr15:38436921-38437412   | 492 | 11 | 5.82E-04 | 3.99 | RefSeq | DISP2     | -314  |
| chr15:41697781-41698278   | 498 | 13 | 6.06E-04 | 3.99 | RefSeq | STRC      | 13    |
| chrX:17304279-17304793    | 515 | 15 | 6.06E-04 | 3.99 | RefSeq | NHS       | 815   |
| chr3:1110163-1110663      | 501 | 14 | 6.06E-04 | 3.99 | RefSeq | CNTN6     | 821   |
| chr4:55908716-55909303    | 588 | 17 | 6.14E-04 | 3.98 | RefSeq | SRD5A3    | 1571  |
| chr6:35853334-35853672    | 339 | 10 | 6.14E-04 | 3.98 | RefSeq | CLPSL2    | 985   |
| chr7:141125605-141126118  | 514 | 15 | 6.22E-04 | 3.98 | RefSeq | TAS2R4    | 847   |
| chr3:187563234-187563771  | 538 | 15 | 6.38E-04 | 3.98 | RefSeq | DGKG      | -516  |
| chr17:30499348-30499734   | 387 | 12 | 6.38E-04 | 3.97 | RefSeq | UNC45B    | 399   |
| chr17:72787498-72788081   | 584 | 17 | 6.38E-04 | 3.97 | RefSeq | 42256     | -1006 |
| chr16:14631250-14631794   | 545 | 13 | 6.38E-04 | 3.97 | RefSeq | PARN      | 0     |
| chr14:74418347-74418841   | 495 | 11 | 6.46E-04 | 3.97 | RefSeq | DLST      | 0     |
| chr9:124731890-124732403  | 514 | 14 | 6.46E-04 | 3.96 | RefSeq | ZBTB26    | 1198  |
| chr19:14390838-14391370   | 533 | 15 | 6.54E-04 | 3.96 | RefSeq | DDX39A    | 0     |
| chr18:27153186-27153705   | 520 | 15 | 6.54E-04 | 3.96 | RefSeq | DSG1      | 1136  |
| chr15:76173777-76174288   | 512 | 14 | 6.54E-04 | 3.96 | RefSeq | SH2D7     | 1795  |
| chr4:123594655-123595129  | 475 | 11 | 6.54E-04 | 3.96 | RefSeq | IL2       | 1972  |
| chr1:204709637-204710154  | 518 | 16 | 6.54E-04 | 3.96 | RefSeq | IKBKE     | -55   |
| chr16:88082991-88083502   | 512 | 13 | 6.87E-04 | 3.95 | RefSeq | ANKRD11   | 969   |
| chr14:57833435-57833923   | 489 | 14 | 6.95E-04 | 3.95 | RefSeq | ARID4A    | -1052 |
| chr10:59696444-59696942   | 499 | 14 | 7.11E-04 | 3.94 | RefSeq | IPMK      | 759   |
| chr1:160304829-160305314  | 486 | 14 | 7.19E-04 | 3.94 | RefSeq | NOS1AP    | -891  |
| chr3:48646920-48647425    | 506 | 14 | 7.19E-04 | 3.94 | RefSeq | SLC26A6   | -636  |
| chr7:66097212-66097710    | 499 | 14 | 7.19E-04 | 3.94 | RefSeq | SBDS      | 314   |
| chr3:115496626-115497131  | 506 | 15 | 7.19E-04 | 3.94 | RefSeq | TIGIT     | 1103  |
| chr2:53848786-53849273    | 488 | 14 | 7.35E-04 | 3.94 | RefSeq | CHAC2     | 353   |
| chr19:35553375-35553896   | 522 | 15 | 7.35E-04 | 3.93 | RefSeq | ZNF536    | -1272 |
| chr7:94375444-94375956    | 513 | 14 | 7.35E-04 | 3.93 | RefSeq | PPP1R9A   | 559   |
| chr11:111541865-111542384 | 520 | 14 | 7.35E-04 | 3.93 | RefSeq | TEX12     | -921  |
| chr1:150902491-150903021  | 531 | 11 | 7.35E-04 | 3.93 | RefSeq | LCE2D     | 0     |
| chr17:33706859-33707285   | 427 | 13 | 7.43E-04 | 3.93 | RefSeq | MRPL45    | 351   |
| chr21:41800567-41801073   | 507 | 14 | 7.51E-04 | 3.93 | RefSeq | TMPRSS2   | 790   |
| chr6:64088492-64089063    | 572 | 16 | 7.51E-04 | 3.93 | RefSeq | LGSN      | -650  |
| chr10:105100633-105101148 | 516 | 14 | 7.51E-04 | 3.93 | RefSeq | PCGF6     | 0     |
| chrX:72138062-72138616    | 555 | 16 | 7.59E-04 | 3.92 | RefSeq | PABPC1L2B | -1461 |
| chr6:71722097-71722594    | 498 | 14 | 7.59E-04 | 3.92 | RefSeq | B3GAT2    | 916   |
| chr1:155051809-155052299  | 491 | 14 | 7.59E-04 | 3.92 | RefSeq | NTRK1     | 0     |
| chr3:25681149-25681694    | 546 | 15 | 7.59E-04 | 3.92 | RefSeq | TOP2B     | -281  |



|                           |     |    |          |      |        |           |       |
|---------------------------|-----|----|----------|------|--------|-----------|-------|
| chr1:85818864-85819351    | 488 | 14 | 7.59E-04 | 3.92 | RefSeq | CYR61     | 0     |
| chr10:72214983-72215475   | 493 | 14 | 7.59E-04 | 3.92 | RefSeq | TBATA     | 0     |
| chr17:24643832-24644348   | 517 | 12 | 7.59E-04 | 3.92 | RefSeq | NUFIP2    | 945   |
| chr14:70442167-70442674   | 508 | 12 | 7.67E-04 | 3.91 | RefSeq | PCNX      | -1201 |
| chr4:113287630-113288161  | 532 | 15 | 7.67E-04 | 3.91 | RefSeq | C4orf32   | 1628  |
| chr19:41121027-41121583   | 557 | 16 | 7.67E-04 | 3.91 | RefSeq | LRFN3     | 1165  |
| chr20:58062925-58063398   | 474 | 12 | 7.67E-04 | 3.91 | RefSeq | C20orf197 | -977  |
| chr11:55318455-55318995   | 541 | 15 | 7.84E-04 | 3.91 | RefSeq | OR5D14    | -613  |
| chr14:49135747-49136142   | 396 | 11 | 8.00E-04 | 3.91 | RefSeq | LRR1      | 582   |
| chr4:87734175-87734842    | 668 | 19 | 8.08E-04 | 3.91 | RefSeq | PTPN13    | 0     |
| chr2:165185615-165186132  | 518 | 15 | 8.16E-04 | 3.91 | RefSeq | GRB14     | 475   |
| chr3:129777902-129778416  | 515 | 11 | 8.16E-04 | 3.91 | ncRNA  | C3orf27   | -282  |
| chr12:62347189-62347698   | 510 | 15 | 8.16E-04 | 3.9  | RefSeq | DPY19L2   | 924   |
| chr11:61006128-61006636   | 509 | 15 | 8.16E-04 | 3.9  | RefSeq | PPP1R32   | 967   |
| chrX:6156368-6156933      | 566 | 16 | 8.16E-04 | 3.9  | RefSeq | NLGN4X    | 0     |
| chr18:69964365-69964904   | 540 | 15 | 8.16E-04 | 3.9  | RefSeq | FBXO15    | 1177  |
| chr22:34965592-34966081   | 490 | 11 | 8.32E-04 | 3.9  | RefSeq | APOL2     | 0     |
| chr19:47073610-47074115   | 506 | 13 | 8.32E-04 | 3.9  | RefSeq | CD79A     | 580   |
| chr6:75970437-75970923    | 487 | 14 | 8.32E-04 | 3.9  | RefSeq | COL12A1   | 1421  |
| chr17:38185408-38185898   | 491 | 14 | 8.32E-04 | 3.89 | RefSeq | WNK4      | -277  |
| chr1:234371274-234371814  | 541 | 15 | 8.40E-04 | 3.89 | RefSeq | GPR137B   | -641  |
| chr1:145481293-145481821  | 529 | 15 | 8.40E-04 | 3.89 | RefSeq | BCL9      | 1398  |
| chr19:7651476-7651964     | 489 | 13 | 8.56E-04 | 3.89 | RefSeq | TRAPPC5   | 0     |
| chr19:2187563-2188105     | 543 | 16 | 8.56E-04 | 3.89 | RefSeq | PLEKHJ1   | -210  |
| chr15:42616163-42616670   | 508 | 13 | 8.56E-04 | 3.89 | RefSeq | EIF3J     | 0     |
| chr4:9392797-9393296      | 500 | 14 | 8.56E-04 | 3.89 | RefSeq | DRD5      | 441   |
| chr2:174820613-174821130  | 518 | 14 | 8.64E-04 | 3.89 | RefSeq | OLA1      | 482   |
| chr6:31789251-31789731    | 481 | 13 | 8.64E-04 | 3.89 | RefSeq | LY6G6D    | -1381 |
| chr12:7234299-7234800     | 502 | 13 | 8.64E-04 | 3.89 | RefSeq | PEX5      | 74    |
| chr12:94709025-94709534   | 510 | 15 | 8.64E-04 | 3.88 | RefSeq | NTN4      | -357  |
| chr22:22529542-22530313   | 772 | 21 | 8.64E-04 | 3.88 | RefSeq | SLC2A11   | 652   |
| chr11:111604028-111604635 | 608 | 17 | 8.64E-04 | 3.88 | RefSeq | PTS       | 1730  |
| chr22:36533025-36533570   | 546 | 14 | 8.64E-04 | 3.88 | RefSeq | GCAT      | -288  |
| chr2:160277672-160278187  | 516 | 14 | 8.64E-04 | 3.88 | RefSeq | MARCH7    | 458   |
| chr16:29738772-29739280   | 509 | 14 | 8.64E-04 | 3.88 | RefSeq | MVP       | 0     |
| chr11:9067379-9067858     | 480 | 13 | 8.64E-04 | 3.88 | RefSeq | SCUBE2    | 1869  |
| chr1:205105202-205105695  | 494 | 14 | 8.64E-04 | 3.88 | RefSeq | IL20      | -82   |
| chr1:176330522-176331016  | 495 | 14 | 8.64E-04 | 3.88 | RefSeq | RASAL2    | 1035  |
| chr2:232497302-232497790  | 489 | 14 | 8.64E-04 | 3.88 | RefSeq | NPPC      | 1493  |

Online supplements are not copyedited prior to posting and the author(s) take full responsibility for the accuracy of all data.



|                          |     |    |          |      |        |              |       |
|--------------------------|-----|----|----------|------|--------|--------------|-------|
| chr1:6502137-6502737     | 601 | 17 | 8.64E-04 | 3.88 | RefSeq | PLEKHG5      | 0     |
| chr15:64370982-64371463  | 482 | 14 | 8.64E-04 | 3.88 | RefSeq | DIS3L        | -1224 |
| chr5:149771301-149771681 | 381 | 10 | 8.89E-04 | 3.87 | RefSeq | CD74         | 1012  |
| chr5:38630890-38631376   | 487 | 14 | 8.89E-04 | 3.87 | RefSeq | LIFR         | 0     |
| chr7:142885066-142885588 | 523 | 15 | 8.89E-04 | 3.87 | RefSeq | TAS2R41      | 0     |
| chr18:3438403-3438903    | 501 | 14 | 8.89E-04 | 3.87 | RefSeq | TGIF1        | -508  |
| chr7:21549101-21549833   | 733 | 20 | 8.89E-04 | 3.87 | RefSeq | DNAH11       | 0     |
| chr11:386148-386650      | 503 | 15 | 8.97E-04 | 3.87 | RefSeq | PKP3         | 1931  |
| chr3:110153051-110153570 | 520 | 15 | 8.97E-04 | 3.87 | RefSeq | GUCA1C       | 1798  |
| chr13:43908340-43908843  | 504 | 14 | 8.97E-04 | 3.87 | RefSeq | TSC22D1      | 548   |
| chr11:6999867-7000520    | 654 | 15 | 8.97E-04 | 3.87 | RefSeq | NLRP14       | 1591  |
| chr1:151280226-151280732 | 507 | 14 | 8.97E-04 | 3.87 | RefSeq | SPRR2D       | -7    |
| chr1:2312574-2313069     | 496 | 14 | 8.97E-04 | 3.87 | RefSeq | MORN1        | 0     |
| chr2:96873743-96874241   | 499 | 15 | 8.97E-04 | 3.86 | RefSeq | ANKRD23      | -257  |
| chr12:50912549-50913051  | 503 | 14 | 8.97E-04 | 3.86 | RefSeq | KRT7         | -170  |
| chr8:31616162-31616651   | 490 | 14 | 8.97E-04 | 3.86 | RefSeq | NRG1         | -159  |
| chr7:96471707-96472271   | 565 | 16 | 8.97E-04 | 3.86 | RefSeq | DLX6         | -955  |
| chr5:108112094-108112696 | 603 | 16 | 8.97E-04 | 3.86 | RefSeq | FER          | 672   |
| chr2:108432367-108432901 | 535 | 15 | 8.97E-04 | 3.86 | RefSeq | GCC2         | 358   |
| chr18:2836389-2836874    | 486 | 14 | 8.97E-04 | 3.86 | RefSeq | EMILIN2      | -154  |
| chr15:19335082-19335586  | 505 | 15 | 8.97E-04 | 3.86 | RefSeq | POTEB2       | 748   |
| chrX:148428203-148428711 | 509 | 15 | 8.97E-04 | 3.86 | ncRNA  | LINC00893    | 493   |
| chr2:229843261-229843754 | 494 | 13 | 8.97E-04 | 3.86 | RefSeq | PID1         | 548   |
| chr17:36646583-36647133  | 551 | 16 | 8.97E-04 | 3.86 | RefSeq | KRTAP9-8     | -663  |
| chr19:54670343-54670844  | 502 | 14 | 9.05E-04 | 3.85 | RefSeq | FLT3LG       | 1065  |
| chr20:35589429-35589919  | 491 | 12 | 9.05E-04 | 3.85 | RefSeq | BLCAP        | 0     |
| chr12:11231693-11232179  | 487 | 14 | 9.05E-04 | 3.85 | RefSeq | TAS2R42      | -882  |
| chr1:43596750-43597242   | 493 | 13 | 9.05E-04 | 3.85 | RefSeq | CDC20        | 0     |
| chr17:77584054-77584529  | 476 | 13 | 9.05E-04 | 3.85 | RefSeq | RAC3         | 1233  |
| chr1:103840890-103841396 | 507 | 14 | 9.05E-04 | 3.85 | RefSeq | LOC101928436 | -196  |
| chr13:44936801-44937297  | 497 | 13 | 9.05E-04 | 3.84 | RefSeq | COG3         | 0     |
| chr7:93470065-93470583   | 519 | 15 | 9.21E-04 | 3.84 | RefSeq | BET1         | 1044  |
| chr11:93772509-93773024  | 516 | 15 | 9.37E-04 | 3.84 | RefSeq | GPR83        | 1210  |
| chr15:86981971-86982460  | 490 | 13 | 9.45E-04 | 3.83 | RefSeq | ISG20        | -583  |
| chr10:62429733-62430216  | 484 | 14 | 9.53E-04 | 3.83 | ncRNA  | RHOBTB1      | 527   |
| chr5:170746738-170747255 | 518 | 15 | 9.53E-04 | 3.83 | RefSeq | NPM1         | -58   |
| chr5:94442050-94442544   | 495 | 14 | 9.53E-04 | 3.83 | RefSeq | MCTP1        | 783   |
| chr6:31656497-31657033   | 537 | 15 | 9.53E-04 | 3.83 | RefSeq | LTB          | 1149  |
| chr4:71098131-71098647   | 517 | 14 | 9.53E-04 | 3.83 | RefSeq | ODAM         | 1298  |

Online supplements are not copyedited prior to posting and the author(s) take full responsibility for the accuracy of all data.

|                           |     |    |          |      |        |          |       |
|---------------------------|-----|----|----------|------|--------|----------|-------|
| chr6:53765913-53766417    | 505 | 14 | 9.53E-04 | 3.83 | RefSeq | LRRC1    | -1320 |
| chr2:207511513-207511998  | 486 | 14 | 9.53E-04 | 3.83 | RefSeq | CPO      | -525  |
| chr6:105958161-105958652  | 492 | 14 | 9.53E-04 | 3.83 | RefSeq | PREP     | -468  |
| chr14:60022360-60022844   | 485 | 14 | 9.53E-04 | 3.83 | RefSeq | C14orf39 | 0     |
| chr20:56157836-56158413   | 578 | 16 | 9.53E-04 | 3.82 | RefSeq | C20orf85 | -976  |
| chr10:22674496-22674996   | 501 | 14 | 9.53E-04 | 3.82 | RefSeq | SPAG6    | 116   |
| chr6:42123700-42124281    | 582 | 17 | 9.53E-04 | 3.82 | RefSeq | CCND3    | 330   |
| chrX:101281865-101282379  | 515 | 15 | 9.61E-04 | 3.82 | RefSeq | TCEAL6   | 1666  |
| chr16:18479726-18480239   | 514 | 14 | 9.61E-04 | 3.82 | RefSeq | NOMO2    | 697   |
| chr12:55130284-55130800   | 517 | 15 | 9.61E-04 | 3.82 | RefSeq | TIMELESS | -816  |
| chr21:42793705-42794222   | 518 | 15 | 9.61E-04 | 3.82 | RefSeq | SLC37A1  | 894   |
| chr10:16601835-16602498   | 664 | 16 | 9.61E-04 | 3.82 | RefSeq | C1QL3    | 1513  |
| chr18:32022968-32023475   | 508 | 14 | 9.69E-04 | 3.82 | RefSeq | MOCOS    | 1490  |
| chrX:119576711-119577211  | 501 | 14 | 9.77E-04 | 3.81 | RefSeq | CUL4B    | 1635  |
| chr7:44051506-44052006    | 501 | 14 | 9.77E-04 | 3.81 | RefSeq | DBNL     | 742   |
| chr21:42606451-42606959   | 509 | 14 | 9.77E-04 | 3.81 | RefSeq | TFF3     | 1817  |
| chr11:102217478-102217980 | 503 | 14 | 9.77E-04 | 3.81 | RefSeq | MMP3     | 1573  |
| chr1:159120147-159120652  | 506 | 14 | 9.77E-04 | 3.81 | RefSeq | ITLN1    | 933   |
| chr5:122400470-122400955  | 486 | 13 | 9.77E-04 | 3.81 | RefSeq | PPIC     | -145  |
| chr5:112099479-112099966  | 488 | 14 | 9.77E-04 | 3.81 | RefSeq | APC      | -1489 |
| chr22:29694641-29695222   | 582 | 15 | 9.77E-04 | 3.81 | RefSeq | MORC2    | -453  |
| chr6:35419497-35419997    | 501 | 14 | 9.86E-04 | 3.81 | RefSeq | PPARD    | 1184  |
| chr3:68122407-68122910    | 504 | 15 | 9.94E-04 | 3.81 | RefSeq | FAM19A1  | -514  |
| chr2:105727200-105727590  | 391 | 11 | 9.94E-04 | 3.81 | RefSeq | NCK2     | -362  |
| chr21:37300697-37301276   | 580 | 16 | 8.08E-06 | 5.09 | RefSeq | RIPPLY3  | 0     |
| chr6:71722993-71723557    | 565 | 16 | 9.69E-05 | 4.55 | RefSeq | B3GAT2   | 0     |
| chr14:102869868-102870386 | 519 | 14 | 1.29E-04 | 4.45 | RefSeq | EIF5     | 0     |
| chr16:74870627-74871319   | 693 | 20 | 1.53E-04 | 4.37 | RefSeq | CNTNAP4  | 1950  |
| chr12:56114873-56115364   | 492 | 14 | 2.26E-04 | 4.28 | RefSeq | INHBC    | 138   |
| chr8:81246883-81247370    | 488 | 13 | 3.15E-04 | 4.2  | RefSeq | TPD52    | -433  |
| chr6:636823-637484        | 662 | 18 | 3.64E-04 | 4.17 | RefSeq | EXOC2    | 658   |
| chr9:98840712-98841254    | 543 | 14 | 3.72E-04 | 4.15 | RefSeq | CTSV     | 493   |
| chr10:126423956-126424485 | 530 | 15 | 4.12E-04 | 4.1  | RefSeq | FAM53B   | -1035 |
| chr10:103805159-103806013 | 855 | 24 | 4.12E-04 | 4.09 | RefSeq | C10orf76 | 0     |
| chr15:20265205-20265716   | 512 | 15 | 4.77E-04 | 4.05 | ncRNA  | GOLGA8DP | 1377  |
| chr19:5792072-5792581     | 510 | 15 | 4.93E-04 | 4.04 | RefSeq | FUT6     | -1329 |
| chr10:22672333-22672958   | 626 | 18 | 5.09E-04 | 4.03 | RefSeq | SPAG6    | -1422 |
| chr1:143708821-143709307  | 487 | 14 | 5.33E-04 | 4.01 | RefSeq | PDE4DIP  | -352  |
| chr1:115012116-115012649  | 534 | 15 | 5.49E-04 | 4    | RefSeq | DENND2C  | 1607  |

|                           |      |    |          |       |        |              |       |
|---------------------------|------|----|----------|-------|--------|--------------|-------|
| chr3:15444359-15444853    | 495  | 13 | 6.38E-04 | 3.97  | RefSeq | METTL6       | -300  |
| chr2:111206459-111206971  | 513  | 12 | 6.54E-04 | 3.95  | RefSeq | ACOXL        | 0     |
| chr20:62264386-62264946   | 561  | 16 | 6.95E-04 | 3.95  | RefSeq | MYT1         | -1325 |
| chr4:141294037-141294528  | 492  | 12 | 7.51E-04 | 3.93  | RefSeq | MAML3        | 156   |
| chr2:72996185-72996699    | 515  | 14 | 8.16E-04 | 3.9   | RefSeq | EMX1         | -1413 |
| chr7:93041425-93041968    | 544  | 16 | 8.72E-04 | 3.88  | RefSeq | CALCR        | 11    |
| chr10:111961946-111962291 | 346  | 10 | 9.45E-04 | 3.83  | RefSeq | MXI1         | 1967  |
| chr2:218791684-218792290  | 607  | 18 | 9.53E-04 | 3.83  | RefSeq | ARPC2        | 1319  |
| chr4:8965343-8966539      | 1197 | 32 | 8.08E-06 | -8.25 | RefSeq | USP17L25     | 881   |
| chr4:8955853-8957049      | 1197 | 32 | 8.08E-06 | -8.06 | RefSeq | USP17L25     | 881   |
| chr4:8960200-8961794      | 1595 | 43 | 8.08E-06 | -7.65 | RefSeq | USP17L25     | 483   |
| chr4:8974870-8976030      | 1161 | 31 | 8.08E-06 | -7.48 | RefSeq | USP17L25     | 917   |
| chr4:8970088-8971284      | 1197 | 32 | 8.08E-06 | -6.32 | RefSeq | USP17L10     | 881   |
| chr7:99744290-99744954    | 665  | 19 | 8.08E-06 | -6.18 | RefSeq | SPDYE3       | 1029  |
| chr8:7178278-7179293      | 1016 | 26 | 8.08E-06 | -6.13 | RefSeq | USP17L1      | 959   |
| chr1:93316250-93316886    | 637  | 18 | 8.08E-06 | -6.06 | RefSeq | MTF2         | -494  |
| chr16:14751309-14751795   | 487  | 14 | 8.08E-06 | -5.5  | RefSeq | NPIPA3       | -376  |
| chr10:45411212-45411849   | 638  | 18 | 8.08E-06 | -5.45 | RefSeq | MARCH8       | -851  |
| chr15:48846611-48847254   | 644  | 19 | 8.08E-06 | -5.44 | RefSeq | SPPL2A       | -1408 |
| chr16:2529373-2530011     | 639  | 18 | 8.08E-06 | -5.42 | RefSeq | PDPK1        | 1407  |
| chr20:25728433-25729326   | 894  | 22 | 8.08E-06 | -5.3  | ncRNA  | FAM182B      | 602   |
| chr9:44942433-44943477    | 1045 | 25 | 8.08E-06 | -5.23 | ncRNA  | LOC102723709 | 1810  |
| chr16:14937943-14938425   | 483  | 14 | 8.08E-06 | -5.22 | RefSeq | NPIPA1       | -376  |
| chr12:119036609-119037389 | 781  | 22 | 8.08E-06 | -5.17 | RefSeq | RAB35        | 1638  |
| chr2:67479271-67480097    | 827  | 24 | 8.08E-06 | -5.17 | RefSeq | ETAA1        | 1325  |
| chr5:52893848-52894499    | 652  | 18 | 8.08E-06 | -5.13 | RefSeq | NDUFS4       | 1626  |
| chr17:3994012-3994804     | 793  | 20 | 8.08E-06 | -5.12 | RefSeq | CYB5D2       | 348   |
| chr2:112957662-112958271  | 610  | 18 | 8.08E-06 | -5.11 | RefSeq | TTL          | 1448  |
| chr11:4571383-4572309     | 927  | 26 | 8.08E-06 | -5.08 | RefSeq | OR52I1       | 0     |
| chr1:29427712-29428275    | 564  | 16 | 8.08E-06 | -5.08 | RefSeq | MECR         | 1783  |
| chr16:70305676-70306366   | 691  | 19 | 8.08E-06 | -5.05 | RefSeq | PHLPP2       | 879   |
| chr19:8951795-8952424     | 630  | 18 | 8.08E-06 | -5.04 | RefSeq | MUC16        | 595   |
| chr16:29368415-29368963   | 549  | 15 | 8.08E-06 | -5.01 | ncRNA  | LOC606724    | 248   |
| chr8:7871010-7871637      | 628  | 16 | 1.62E-05 | -4.95 | RefSeq | USP17L3      | 1281  |
| chr17:36792212-36792764   | 553  | 16 | 2.42E-05 | -4.86 | RefSeq | KRT34        | -49   |
| chr8:92151917-92152588    | 672  | 19 | 3.23E-05 | -4.76 | RefSeq | OTUD6B       | 317   |
| chr3:64649742-64650549    | 808  | 20 | 3.23E-05 | -4.75 | RefSeq | ADAMTS9      | -1336 |
| chrX:152516355-152516757  | 403  | 12 | 4.85E-05 | -4.67 | RefSeq | FAM58A       | 1070  |
| chr1:27574429-27574860    | 432  | 12 | 4.85E-05 | -4.66 | RefSeq | FCN3         | -526  |

|                              |      |    |          |       |        |               |       |
|------------------------------|------|----|----------|-------|--------|---------------|-------|
| chr5:40871178-40871754       | 577  | 15 | 4.85E-05 | -4.64 | RefSeq | RPL37         | -33   |
| chr5_h2_hap1:1006229-1006797 | 569  | 17 | 5.65E-05 | -4.63 | RefSeq | GTF2H2C_2     | -936  |
| chr16:15380013-15380485      | 473  | 14 | 5.65E-05 | -4.62 | RefSeq | NPIPA5        | -360  |
| chr22:49334801-49335387      | 587  | 16 | 5.65E-05 | -4.61 | RefSeq | KLHDC7B       | 1473  |
| chrX:119903990-119904472     | 483  | 14 | 5.65E-05 | -4.57 | RefSeq | CT47A10       | -435  |
| chr19:46952491-46953026      | 536  | 16 | 5.65E-05 | -4.57 | RefSeq | CEACAM6       | 1223  |
| chr10:7783971-7784425        | 455  | 14 | 6.46E-05 | -4.56 | RefSeq | ITIH2         | -817  |
| chr16:3871392-3871948        | 557  | 16 | 6.46E-05 | -4.56 | RefSeq | CREBBP        | -1269 |
| chr7:44008532-44009145       | 614  | 17 | 6.46E-05 | -4.56 | RefSeq | SPDYE1        | 1518  |
| chr5:56147540-56148357       | 818  | 21 | 8.08E-05 | -4.52 | RefSeq | MAP3K1        | 883   |
| chr10:76539876-76540427      | 552  | 16 | 8.89E-05 | -4.5  | RefSeq | DUSP13        | -899  |
| chr11:67109561-67110281      | 721  | 19 | 8.89E-05 | -4.5  | RefSeq | GSTP1         | 1919  |
| chr2:51113197-51113869       | 673  | 19 | 8.89E-05 | -4.5  | RefSeq | NRXN1         | -18   |
| chr19:2232043-2232934        | 892  | 25 | 8.89E-05 | -4.48 | RefSeq | C19orf35      | 248   |
| chr3:154364367-154364940     | 574  | 15 | 8.89E-05 | -4.47 | RefSeq | RAP2B         | 1676  |
| chr19:46635988-46636823      | 836  | 19 | 8.89E-05 | -4.46 | RefSeq | ATP5SL        | 499   |
| chr3:47597637-47598207       | 571  | 16 | 8.89E-05 | -4.45 | RefSeq | CSPG5         | -902  |
| chr1:166150157-166150783     | 627  | 18 | 9.69E-05 | -4.42 | RefSeq | ADCY10        | -68   |
| chr16:87751547-87752765      | 1219 | 35 | 9.69E-05 | -4.42 | ncRNA  | LINC00304     | -364  |
| chr19:54707350-54707824      | 475  | 14 | 9.69E-05 | -4.41 | RefSeq | FCGRT         | 2     |
| chr11:123314848-123316000    | 1153 | 31 | 9.69E-05 | -4.41 | RefSeq | OR4D5         | 0     |
| chrX:118582497-118583065     | 569  | 16 | 1.05E-04 | -4.41 | RefSeq | CXorf56       | 336   |
| chr7:47984028-47984519       | 492  | 14 | 1.13E-04 | -4.38 | RefSeq | HUS1          | 1229  |
| chr17:70912220-70912828      | 609  | 18 | 1.13E-04 | -4.38 | RefSeq | GRB2          | 557   |
| chr2:118560844-118561362     | 519  | 15 | 1.13E-04 | -4.36 | RefSeq | INSIG2        | -1158 |
| chr3:49288273-49288805       | 533  | 15 | 1.13E-04 | -4.36 | RefSeq | C3orf62       | 708   |
| chr19:9296370-9296810        | 441  | 13 | 1.13E-04 | -4.36 | RefSeq | ZNF559-ZNF177 | 468   |
| chr17:37275062-37275600      | 539  | 11 | 1.29E-04 | -4.35 | RefSeq | KLHL11        | 0     |
| chr3:185498339-185498882     | 544  | 11 | 1.29E-04 | -4.35 | RefSeq | PSMD2         | -698  |
| chr2:102340408-102340929     | 522  | 15 | 1.29E-04 | -4.35 | RefSeq | IL18R1        | 1233  |
| chr13:40393475-40394212      | 738  | 21 | 1.29E-04 | -4.35 | ncRNA  | SUGT1P3       | 0     |
| chr11:117982740-117983443    | 704  | 19 | 1.29E-04 | -4.35 | RefSeq | PHLDB1        | -73   |
| chr1:222370282-222370782     | 501  | 14 | 1.29E-04 | -4.34 | RefSeq | FBXO28        | 1870  |
| chr12:105163796-105164336    | 541  | 13 | 1.29E-04 | -4.34 | RefSeq | CKAP4         | 1508  |
| chr1:240076337-240076864     | 528  | 15 | 1.29E-04 | -4.33 | RefSeq | EXO1          | -1252 |
| chr14:104360257-104360804    | 548  | 11 | 1.29E-04 | -4.32 | ncRNA  | LINC00638     | 1674  |
| chrX:103386593-103387528     | 936  | 24 | 1.37E-04 | -4.32 | RefSeq | ESX1          | -337  |
| chr1:58784281-58784719       | 439  | 13 | 1.37E-04 | -4.31 | RefSeq | OMA1          | 316   |
| chr1:53302141-53302910       | 770  | 15 | 1.37E-04 | -4.31 | RefSeq | PODN          | 1829  |





|                          |     |    |          |       |        |           |       |
|--------------------------|-----|----|----------|-------|--------|-----------|-------|
| chr3:47817869-47818406   | 538 | 16 | 1.53E-04 | -4.29 | RefSeq | DHX30     | -997  |
| chr7:74861271-74861810   | 540 | 16 | 1.70E-04 | -4.28 | RefSeq | TRIM73    | -1029 |
| chr2:27201531-27201974   | 444 | 13 | 1.78E-04 | -4.27 | RefSeq | ABHD1     | 1370  |
| chr1:1836018-1836621     | 604 | 17 | 1.78E-04 | -4.27 | RefSeq | CALML6    | 0     |
| chr8:107849507-107849882 | 376 | 11 | 1.78E-04 | -4.26 | RefSeq | ABRA      | 1767  |
| chrX:1533041-1533641     | 601 | 17 | 1.86E-04 | -4.26 | RefSeq | ASMTL     | -385  |
| chr2:27445826-27446483   | 658 | 18 | 1.86E-04 | -4.25 | RefSeq | EIF2B4    | 346   |
| chr8:82558365-82558987   | 623 | 18 | 1.86E-04 | -4.25 | RefSeq | FABP4     | -336  |
| chr8:67945885-67946413   | 529 | 15 | 1.86E-04 | -4.25 | RefSeq | MCMDC2    | 0     |
| chr17:73390667-73391429  | 763 | 19 | 1.86E-04 | -4.24 | ncRNA  | FLJ45079  | 336   |
| chr20:51634449-51635026  | 578 | 17 | 1.86E-04 | -4.24 | RefSeq | ZNF217    | -1405 |
| chr5:68890263-68890876   | 614 | 17 | 1.86E-04 | -4.23 | RefSeq | GTF2H2C_2 | -954  |
| chr5:154073913-154074496 | 584 | 13 | 1.86E-04 | -4.22 | RefSeq | LARP1     | 1258  |
| chr19:60075550-60075948  | 399 | 12 | 1.86E-04 | -4.22 | RefSeq | FCAR      | -1413 |
| chr5:41940790-41941175   | 386 | 11 | 1.86E-04 | -4.21 | RefSeq | C5orf51   | 563   |
| chrX:119896725-119897439 | 715 | 21 | 1.86E-04 | -4.21 | RefSeq | CT47A10   | 1255  |
| chr15:28161818-28162366  | 549 | 15 | 1.94E-04 | -4.21 | RefSeq | GOLGA8J   | -84   |
| chr20:30812448-30813180  | 733 | 20 | 1.94E-04 | -4.21 | RefSeq | DNMT3B    | -672  |
| chr3:75797511-75798089   | 579 | 16 | 1.94E-04 | -4.21 | RefSeq | FRG2C     | 1334  |
| chr11:65139116-65139881  | 766 | 23 | 1.94E-04 | -4.2  | RefSeq | MAP3K11   | -819  |
| chrX:119178110-119178587 | 478 | 14 | 1.94E-04 | -4.2  | RefSeq | RHOXF2B   | 1615  |
| chr16:2421001-2421383    | 383 | 11 | 1.94E-04 | -4.19 | RefSeq | CCNF      | 1605  |
| chr2:119321872-119322463 | 592 | 16 | 2.02E-04 | -4.18 | RefSeq | EN1       | 0     |
| chr1:173304729-173305259 | 531 | 15 | 2.02E-04 | -4.18 | RefSeq | TNN       | 1112  |
| chr1:148867678-148868327 | 650 | 17 | 2.02E-04 | -4.17 | RefSeq | ENSA      | 396   |
| chr8:124851702-124852237 | 536 | 16 | 2.02E-04 | -4.17 | RefSeq | FAM91A1   | 1639  |
| chr7:38635936-38636513   | 578 | 17 | 2.02E-04 | -4.17 | RefSeq | AMPH      | 1180  |
| chr7:74963856-74964367   | 512 | 14 | 2.02E-04 | -4.16 | RefSeq | SPDYE5    | 1621  |
| chr19:38156628-38157232  | 605 | 17 | 2.02E-04 | -4.15 | RefSeq | C19orf40  | 1665  |
| chrX:77041692-77042221   | 530 | 15 | 2.02E-04 | -4.15 | RefSeq | COX7B     | 75    |
| chr22:29198028-29198737  | 710 | 20 | 2.02E-04 | -4.15 | RefSeq | SEC14L3   | 0     |
| chr11:57067449-57068126  | 678 | 19 | 2.10E-04 | -4.14 | RefSeq | SMTNL1    | 759   |
| chr22:21316395-21317256  | 862 | 24 | 2.10E-04 | -4.14 | RefSeq | GGTLC2    | 0     |
| chr14:22356907-22357573  | 667 | 18 | 2.10E-04 | -4.13 | RefSeq | SLC7A7    | 1288  |
| chr15:99610732-99611269  | 538 | 15 | 2.10E-04 | -4.12 | RefSeq | CHSY1     | -1071 |
| chr1:202001527-202001917 | 391 | 11 | 2.18E-04 | -4.12 | RefSeq | LAX1      | 620   |
| chr5:115935957-115936612 | 656 | 19 | 2.18E-04 | -4.12 | RefSeq | SEMA6A    | 1910  |
| chrX:99963750-99964202   | 453 | 13 | 2.26E-04 | -4.12 | RefSeq | CSTF2     | 1746  |
| chr6:26548825-26549211   | 387 | 10 | 2.26E-04 | -4.11 | RefSeq | BTN3A3    | 146   |

Online supplements are not copyedited prior to posting and the author(s) take full responsibility for the accuracy of all data.

|                           |     |    |          |       |        |           |       |
|---------------------------|-----|----|----------|-------|--------|-----------|-------|
| chr4:148825396-148825783  | 388 | 11 | 2.26E-04 | -4.11 | RefSeq | PRMT9     | -665  |
| chr10:75071542-75071913   | 372 | 11 | 2.26E-04 | -4.11 | RefSeq | MYOZ1     | -20   |
| chr3:173044245-173044891  | 647 | 17 | 2.26E-04 | -4.11 | RefSeq | TMEM212   | 412   |
| chr19:12110288-12110877   | 590 | 13 | 2.26E-04 | -4.1  | RefSeq | ZNF20     | 1346  |
| chrX:22202473-22202988    | 516 | 15 | 2.26E-04 | -4.1  | RefSeq | ZNF645    | 1522  |
| chr4:88941279-88941793    | 515 | 13 | 2.26E-04 | -4.1  | RefSeq | IBSP      | 1553  |
| chr11:4585566-4586084     | 519 | 14 | 2.26E-04 | -4.1  | RefSeq | TRIM68    | 0     |
| chr7:158313894-158314777  | 884 | 25 | 2.26E-04 | -4.09 | RefSeq | ESYT2     | 304   |
| chr6:116705830-116706397  | 568 | 16 | 2.26E-04 | -4.09 | RefSeq | TSPYL1    | 1577  |
| chr9:74755727-74756350    | 624 | 18 | 2.26E-04 | -4.09 | RefSeq | ALDH1A1   | 1704  |
| chr7:134322894-134323872  | 979 | 27 | 2.26E-04 | -4.09 | RefSeq | AGBL3     | 1095  |
| chr4:8977884-8978870      | 987 | 25 | 2.26E-04 | -4.08 | ncRNA  | USP17L6P  | 0     |
| chr10:116570566-116571087 | 522 | 14 | 2.26E-04 | -4.08 | RefSeq | FAM160B1  | -406  |
| chr10:48907342-48907854   | 513 | 14 | 2.26E-04 | -4.08 | ncRNA  | CTGLF12P  | 1811  |
| chr11:33055459-33056028   | 570 | 16 | 2.26E-04 | -4.08 | ncRNA  | LINC00294 | 1187  |
| chr10:75125201-75125744   | 544 | 15 | 2.26E-04 | -4.08 | RefSeq | AGAP5     | 1817  |
| chr8:22477686-22478261    | 576 | 14 | 2.26E-04 | -4.08 | RefSeq | SORBS3    | -863  |
| chr6:74288363-74288942    | 580 | 17 | 2.34E-04 | -4.07 | RefSeq | EEF1A1    | -886  |
| chr19:61135139-61135652   | 514 | 15 | 2.34E-04 | -4.07 | RefSeq | NLRP13    | 0     |
| chr11:47693469-47693912   | 444 | 13 | 2.34E-04 | -4.07 | RefSeq | AGBL2     | 0     |
| chrX:106903235-106903782  | 548 | 16 | 2.34E-04 | -4.06 | RefSeq | TSC22D3   | 1892  |
| chr3:75346447-75347021    | 575 | 16 | 2.34E-04 | -4.06 | ncRNA  | MIR4444-1 | 130   |
| chr1:212792314-212792811  | 498 | 11 | 2.34E-04 | -4.06 | RefSeq | PTPN14    | -666  |
| chrX:40477641-40478194    | 554 | 16 | 2.42E-04 | -4.05 | RefSeq | MED14OS   | -1398 |
| chr7:98987094-98987762    | 669 | 18 | 2.50E-04 | -4.05 | RefSeq | FAM200A   | 0     |
| chr14:20318025-20318531   | 507 | 15 | 2.50E-04 | -4.05 | RefSeq | RNASE6    | -519  |
| chr10:119125806-119126217 | 412 | 12 | 2.50E-04 | -4.05 | RefSeq | PDZD8     | -878  |
| chr14:30097316-30097884   | 569 | 16 | 2.59E-04 | -4.05 | RefSeq | G2E3      | -196  |
| chr17:35371886-35372608   | 723 | 20 | 2.59E-04 | -4.04 | RefSeq | GSDMA     | -144  |
| chr14:92283607-92284097   | 491 | 14 | 2.59E-04 | -4.04 | RefSeq | LGMN      | 704   |
| chr16:74127225-74127593   | 369 | 11 | 2.67E-04 | -4.04 | RefSeq | CHST5     | -655  |
| chrX:119894282-119894748  | 467 | 13 | 2.67E-04 | -4.04 | RefSeq | CT47B1    | -474  |
| chr1:149310878-149311344  | 467 | 13 | 2.67E-04 | -4.03 | RefSeq | GABPB2    | 1174  |
| chrX:48929588-48930332    | 745 | 21 | 2.67E-04 | -4.03 | RefSeq | PRICKLE3  | 0     |
| chr13:33291323-33291860   | 538 | 16 | 2.67E-04 | -4.03 | RefSeq | RFC3      | 1117  |
| chr2:46778352-46779141    | 790 | 18 | 2.67E-04 | -4.03 | RefSeq | SOCS5     | -462  |
| chr15:72828385-72828969   | 585 | 14 | 2.75E-04 | -4.02 | RefSeq | CYP1A2    | 148   |
| chr4:37504866-37505409    | 544 | 15 | 2.83E-04 | -4.02 | RefSeq | PGM2      | 189   |
| chr2:219789485-219790027  | 543 | 15 | 2.83E-04 | -4.02 | RefSeq | ABCB6     | 1930  |

|                           |     |    |          |       |        |          |       |
|---------------------------|-----|----|----------|-------|--------|----------|-------|
| chr7:115928071-115928733  | 663 | 19 | 2.83E-04 | -4.02 | RefSeq | CAV2     | 1180  |
| chr5:149647772-149648536  | 765 | 22 | 2.83E-04 | -4.02 | RefSeq | CAMK2A   | 1061  |
| chr11:92704083-92704593   | 511 | 15 | 2.91E-04 | -4.02 | RefSeq | CCDC67   | 552   |
| chr19:6687656-6688296     | 641 | 17 | 2.91E-04 | -4.01 | RefSeq | GPR108   | 338   |
| chr2:219283873-219284357  | 485 | 14 | 2.91E-04 | -4.01 | RefSeq | TTLL4    | 61    |
| chr7:56087502-56087950    | 449 | 13 | 2.99E-04 | -4.01 | RefSeq | CCT6A    | 630   |
| chr11:82675144-82675641   | 498 | 14 | 3.07E-04 | -4.01 | RefSeq | CCDC90B  | -45   |
| chr1:39096237-39096661    | 425 | 13 | 3.07E-04 | -4    | RefSeq | RRAGC    | 1422  |
| chr4:185809456-185809788  | 333 | 10 | 3.07E-04 | -4    | RefSeq | PRIMPOL  | 1695  |
| chr12:118590689-118591113 | 425 | 13 | 3.07E-04 | -4    | RefSeq | PRKAB1   | 545   |
| chr17:7550174-7550620     | 447 | 13 | 3.15E-04 | -3.99 | RefSeq | EFNB3    | 929   |
| chrX:47851872-47852368    | 497 | 14 | 3.15E-04 | -3.99 | ncRNA  | SSX6     | 0     |
| chr2:113971301-113971666  | 366 | 10 | 3.39E-04 | -3.98 | RefSeq | FOXD4L1  | -1465 |
| chrX:119623654-119624149  | 496 | 13 | 3.47E-04 | -3.97 | RefSeq | MCTS1    | 1074  |
| chr21:42657302-42657812   | 511 | 14 | 3.47E-04 | -3.96 | RefSeq | TFF1     | 1902  |
| chr11:114878028-114878532 | 505 | 13 | 3.47E-04 | -3.95 | RefSeq | CADM1    | 1920  |
| chr9:5502065-5502562      | 498 | 14 | 3.47E-04 | -3.95 | RefSeq | PDCD1LG2 | 1520  |
| chr10:102809274-102809814 | 541 | 16 | 3.47E-04 | -3.95 | RefSeq | KAZALD1  | -1175 |
| chrX:48048361-48048967    | 607 | 17 | 3.47E-04 | -3.94 | ncRNA  | SSX9     | 1592  |
| chr2:127999309-127999794  | 486 | 12 | 3.47E-04 | -3.94 | RefSeq | IWS1     | 764   |
| chr1:16920592-16921142    | 551 | 16 | 3.47E-04 | -3.94 | ncRNA  | ESPNP    | -1352 |
| chr5:175325893-175326432  | 540 | 11 | 3.64E-04 | -3.93 | RefSeq | THOC3    | 1493  |
| chrX:119942895-119943377  | 483 | 14 | 3.72E-04 | -3.93 | RefSeq | CT47A10  | -435  |
| chr9:71478038-71478581    | 544 | 16 | 3.72E-04 | -3.93 | RefSeq | APBA1    | -942  |
| chr2:27653305-27653811    | 507 | 14 | 3.88E-04 | -3.91 | RefSeq | C2orf16  | 412   |
| chrX:125127820-125128323  | 504 | 14 | 3.96E-04 | -3.9  | RefSeq | DCAF12L2 | -58   |
| chr1:119485470-119485996  | 527 | 15 | 3.96E-04 | -3.9  | RefSeq | WARS2    | -651  |
| chr8:86760575-86761063    | 489 | 13 | 4.20E-04 | -3.9  | ncRNA  | REXO1L2P | 932   |
| chr22:20069548-20070057   | 510 | 14 | 4.20E-04 | -3.89 | RefSeq | RIMBP3C  | 1885  |
| chr6:107456361-107456858  | 498 | 11 | 4.28E-04 | -3.89 | RefSeq | C6orf203 | 292   |
| chr8:55095485-55095987    | 503 | 13 | 4.28E-04 | -3.89 | RefSeq | TCEA1    | 1583  |
| chr5:78444866-78445383    | 518 | 15 | 4.28E-04 | -3.89 | RefSeq | BHMT     | 1506  |
| chr10:35419047-35419540   | 494 | 11 | 4.28E-04 | -3.89 | RefSeq | CUL2     | 37    |
| chr12:63083177-63083687   | 511 | 10 | 4.28E-04 | -3.89 | RefSeq | XPOT     | -733  |
| chr22:49412585-49413095   | 511 | 14 | 4.28E-04 | -3.89 | RefSeq | ARSA     | 373   |
| chr19:50701216-50701701   | 486 | 12 | 4.36E-04 | -3.88 | RefSeq | VASP     | -827  |
| chr1:12814454-12814785    | 332 | 10 | 4.52E-04 | -3.87 | RefSeq | PRAMEF11 | -602  |
| chr4:144700495-144700914  | 420 | 11 | 4.52E-04 | -3.87 | ncRNA  | GUSBP5   | 420   |
| chr3:140150665-140151290  | 626 | 17 | 4.60E-04 | -3.87 | RefSeq | FOXL2NB  | 1899  |

|                           |     |    |          |       |        |           |       |
|---------------------------|-----|----|----------|-------|--------|-----------|-------|
| chr10:69900134-69900676   | 543 | 11 | 4.60E-04 | -3.86 | RefSeq | DNA2      | 1061  |
| chr4:148873170-148873670  | 501 | 14 | 4.69E-04 | -3.86 | RefSeq | ARHGAP10  | 267   |
| chr11:49011405-49011909   | 505 | 12 | 4.69E-04 | -3.85 | RefSeq | TRIM49B   | 1677  |
| chrX:71850026-71850595    | 570 | 15 | 4.69E-04 | -3.85 | RefSeq | PHKA1     | 160   |
| chr19:1124155-1124683     | 529 | 14 | 4.69E-04 | -3.85 | RefSeq | SBNO2     | 600   |
| chr15:76005489-76005983   | 495 | 14 | 4.69E-04 | -3.85 | ncRNA  | LOC645752 | 261   |
| chr8:22282300-22282816    | 517 | 15 | 4.69E-04 | -3.85 | RefSeq | SLC39A14  | 1593  |
| chr19:17817926-17818369   | 444 | 14 | 4.69E-04 | -3.84 | RefSeq | JAK3      | 1473  |
| chr19:58355196-58355745   | 550 | 15 | 4.69E-04 | -3.84 | RefSeq | ZNF347    | -1070 |
| chr6:158163717-158164236  | 520 | 11 | 4.77E-04 | -3.84 | RefSeq | SNX9      | 0     |
| chr11:123686243-123686750 | 508 | 14 | 4.93E-04 | -3.83 | RefSeq | OR8D1     | -370  |
| chr14:22467061-22467631   | 571 | 17 | 4.93E-04 | -3.83 | RefSeq | PRMT5     | 1004  |
| chr6:26493279-26493726    | 448 | 13 | 5.09E-04 | -3.82 | RefSeq | BTN2A2    | 1861  |
| chrX:99785709-99786215    | 507 | 12 | 5.09E-04 | -3.82 | RefSeq | SRPX2     | 0     |
| chr10:43606536-43607042   | 507 | 14 | 5.17E-04 | -3.82 | ncRNA  | HNRNPA3P1 | -664  |
| chr17:36191496-36192008   | 513 | 14 | 5.25E-04 | -3.81 | RefSeq | KRT27     | 305   |
| chr3:151963259-151963821  | 563 | 16 | 5.25E-04 | -3.81 | RefSeq | SIAH2     | 133   |
| chr6:41997555-41998041    | 487 | 14 | 5.25E-04 | -3.81 | RefSeq | BYSL      | 612   |
| chr3:49441181-49441701    | 521 | 15 | 5.33E-04 | -3.81 | RefSeq | NICN1     | 61    |
| chr14:73073152-73073641   | 490 | 10 | 5.33E-04 | -3.81 | RefSeq | ACOT1     | -40   |
| chr9:4479312-4479821      | 510 | 15 | 5.33E-04 | -3.8  | RefSeq | SLC1A1    | -606  |
| chr19:11512308-11512895   | 588 | 16 | 5.33E-04 | -3.8  | RefSeq | CNN1      | 1729  |
| chr9:94096772-94097267    | 496 | 14 | 5.33E-04 | -3.8  | RefSeq | IARS      | -912  |
| chr4:166173140-166173480  | 341 | 10 | 5.33E-04 | -3.8  | RefSeq | TRIM60    | 539   |
| chr18:62423576-62424066   | 491 | 14 | 5.33E-04 | -3.8  | RefSeq | CDH19     | -1220 |
| chr10:15249733-15250315   | 583 | 15 | 5.41E-04 | -3.79 | RefSeq | NMT2      | 387   |
| chr3:194755007-194755550  | 544 | 14 | 5.41E-04 | -3.79 | RefSeq | ATP13A4   | 0     |
| chr19:63175394-63175947   | 554 | 16 | 5.41E-04 | -3.79 | RefSeq | C19orf18  | 1768  |
| chr7:99411965-99412379    | 415 | 11 | 5.41E-04 | -3.79 | RefSeq | AZGP1     | -293  |
| chr1:161028937-161029421  | 485 | 14 | 5.41E-04 | -3.79 | RefSeq | HSD17B7   | 1817  |
| chr4:145785391-145786012  | 622 | 17 | 5.41E-04 | -3.79 | RefSeq | HHIP      | -586  |
| chr3:120879261-120879681  | 421 | 12 | 5.49E-04 | -3.78 | RefSeq | COX17     | -327  |
| chr6:30648546-30649064    | 519 | 15 | 5.49E-04 | -3.78 | RefSeq | ABCF1     | 1397  |
| chr8:124817785-124818243  | 459 | 13 | 5.57E-04 | -3.78 | RefSeq | ANXA13    | 586   |
| chr16:33114091-33114658   | 568 | 30 | 5.57E-04 | -3.78 | RefSeq | TP53TG3B  | 1007  |
| chrX:119938115-119938517  | 403 | 12 | 5.57E-04 | -3.78 | RefSeq | CT47A10   | -515  |
| chr1:245988345-245988882  | 538 | 15 | 5.57E-04 | -3.78 | RefSeq | OR1C1     | -13   |
| chr13:45324473-45325023   | 551 | 15 | 5.57E-04 | -3.78 | RefSeq | SIAH3     | -625  |
| chr8:119190751-119191292  | 542 | 14 | 5.57E-04 | -3.77 | RefSeq | EXT1      | 1948  |

|                           |     |    |          |       |        |           |       |
|---------------------------|-----|----|----------|-------|--------|-----------|-------|
| chrX:114157975-114158494  | 520 | 15 | 5.57E-04 | -3.77 | RefSeq | IL13RA2   | 0     |
| chr19:57242852-57243370   | 519 | 13 | 5.65E-04 | -3.77 | RefSeq | ZNF432    | 516   |
| chr19:56652263-56652757   | 495 | 13 | 5.65E-04 | -3.77 | RefSeq | SIGLEC8   | 764   |
| chr9:33666114-33666788    | 675 | 19 | 5.74E-04 | -3.76 | ncRNA  | PTENP1    | 631   |
| chr15:86964229-86964618   | 390 | 11 | 5.90E-04 | -3.75 | RefSeq | AEN       | -913  |
| chr10:47212222-47212709   | 488 | 13 | 5.98E-04 | -3.75 | ncRNA  | FAM25BP   | 1912  |
| chr1:119757203-119757582  | 380 | 11 | 5.98E-04 | -3.75 | RefSeq | HSD3B2    | -1495 |
| chr21:45699363-45699945   | 583 | 17 | 5.98E-04 | -3.75 | RefSeq | COL18A1   | 0     |
| chr2:6041398-6041892      | 495 | 14 | 5.98E-04 | -3.75 | ncRNA  | LOC400940 | 1837  |
| chr16:55218406-55218834   | 429 | 12 | 5.98E-04 | -3.75 | RefSeq | MT1E      | 1320  |
| chr14:19459085-19459603   | 519 | 15 | 6.14E-04 | -3.74 | RefSeq | OR4K5     | 479   |
| chr1:35796754-35797154    | 401 | 12 | 6.14E-04 | -3.74 | RefSeq | NCDN      | 774   |
| chr17:70768144-70768657   | 514 | 15 | 6.22E-04 | -3.74 | RefSeq | GGA3      | 1413  |
| chr7:107088580-107089169  | 590 | 17 | 6.30E-04 | -3.73 | RefSeq | SLC26A4   | 264   |
| chr6:44419869-44420401    | 533 | 15 | 6.30E-04 | -3.73 | RefSeq | SPATS1    | 1494  |
| chrX:48214791-48215238    | 448 | 13 | 6.30E-04 | -3.73 | RefSeq | SLC38A5   | -1202 |
| chr8:12031707-12032401    | 695 | 17 | 6.30E-04 | -3.73 | RefSeq | USP17L2   | 1278  |
| chr12:42436890-42437229   | 340 | 10 | 6.30E-04 | -3.73 | RefSeq | PUS7L     | 1615  |
| chr15:39311282-39311682   | 401 | 12 | 6.38E-04 | -3.73 | RefSeq | EXD1      | -1034 |
| chr4:5071806-5072303      | 498 | 14 | 6.38E-04 | -3.72 | RefSeq | CYTL1     | 0     |
| chr11:17255652-17256169   | 518 | 14 | 6.46E-04 | -3.72 | RefSeq | NUCB2     | 790   |
| chr10:126420857-126421408 | 552 | 15 | 6.54E-04 | -3.72 | RefSeq | FAM53B    | 1513  |
| chr8:120290457-120290953  | 497 | 14 | 6.54E-04 | -3.72 | RefSeq | MAL2      | 666   |
| chr6:49787877-49788377    | 501 | 15 | 6.54E-04 | -3.72 | RefSeq | CRISP2    | 886   |
| chr14:22522378-22522735   | 358 | 10 | 6.54E-04 | -3.72 | RefSeq | AJUBA     | -686  |
| chr11:33846365-33846902   | 538 | 15 | 6.54E-04 | -3.71 | RefSeq | LMO2      | 1184  |
| chrX:55531277-55531650    | 374 | 11 | 6.62E-04 | -3.71 | RefSeq | USP51     | 707   |
| chr6:26038319-26038821    | 503 | 14 | 6.70E-04 | -3.71 | RefSeq | SLC17A2   | 113   |
| chr10:15171932-15172672   | 741 | 21 | 6.79E-04 | -3.71 | RefSeq | ACBD7     | -1150 |
| chr1:242582995-242583550  | 556 | 12 | 6.79E-04 | -3.7  | RefSeq | C1orf100  | 435   |
| chr3:180270514-180271086  | 573 | 16 | 6.79E-04 | -3.7  | RefSeq | ZMAT3     | 1265  |
| chr19:9982912-9983263     | 352 | 11 | 6.79E-04 | -3.7  | RefSeq | COL5A3    | -764  |
| chr4:280119-280672        | 554 | 12 | 6.79E-04 | -3.7  | RefSeq | ZNF732    | -174  |
| chr5:95184141-95184657    | 517 | 15 | 6.79E-04 | -3.7  | RefSeq | GLRX      | 0     |
| chr10:13667262-13667718   | 457 | 13 | 6.79E-04 | -3.7  | RefSeq | PRPF18    | -1227 |
| chr9:42999421-43000119    | 699 | 18 | 6.79E-04 | -3.7  | ncRNA  | GXYLT1P3  | -1027 |
| chr2:25118880-25119387    | 508 | 14 | 6.79E-04 | -3.7  | RefSeq | EFR3B     | 403   |
| chr11:5233896-5234337     | 442 | 10 | 7.11E-04 | -3.69 | RefSeq | HBG2      | -1308 |
| chr11:64404713-64405192   | 480 | 13 | 7.19E-04 | -3.69 | RefSeq | EHD1      | -951  |

|                           |     |    |          |       |        |          |       |
|---------------------------|-----|----|----------|-------|--------|----------|-------|
| chr20:56990897-56991482   | 586 | 12 | 7.27E-04 | -3.69 | RefSeq | NELFCD   | 1239  |
| chr1:150148607-150149123  | 517 | 14 | 7.27E-04 | -3.69 | RefSeq | THEM4    | 0     |
| chr2:207015852-207016356  | 505 | 14 | 7.35E-04 | -3.68 | RefSeq | ADAM23   | -257  |
| chr16:27123898-27124335   | 438 | 13 | 7.35E-04 | -3.68 | RefSeq | KDM8     | 1101  |
| chr3:47528255-47528719    | 465 | 11 | 7.35E-04 | -3.68 | RefSeq | ELP6     | 1485  |
| chr16:55777631-55778134   | 504 | 13 | 7.35E-04 | -3.68 | RefSeq | FAM192A  | -153  |
| chr15:79451879-79452587   | 709 | 19 | 7.35E-04 | -3.68 | RefSeq | TMC3     | 887   |
| chr2:37045791-37046306    | 516 | 14 | 7.35E-04 | -3.68 | RefSeq | STRN     | 814   |
| chr15:32616255-32616781   | 527 | 14 | 7.43E-04 | -3.68 | RefSeq | GOLGA8B  | -740  |
| chr18:42955263-42955764   | 502 | 14 | 7.43E-04 | -3.68 | RefSeq | IER3IP1  | 980   |
| chr12:115658333-115658746 | 414 | 12 | 7.43E-04 | -3.68 | RefSeq | C12orf49 | 1481  |
| chr7:148358159-148358562  | 404 | 12 | 7.43E-04 | -3.68 | RefSeq | PDIA4    | -1443 |
| chr3:47396205-47396732    | 528 | 12 | 7.43E-04 | -3.68 | RefSeq | PTPN23   | -763  |
| chr6:150111658-150112209  | 552 | 15 | 7.43E-04 | -3.67 | RefSeq | PCMT1    | -315  |
| chr14:75906497-75907009   | 513 | 13 | 7.43E-04 | -3.67 | RefSeq | ESRRB    | -434  |
| chr11:56066740-56067232   | 493 | 14 | 7.43E-04 | -3.67 | RefSeq | OR5M11   | 78    |
| chr13:109759608-109760031 | 424 | 12 | 7.43E-04 | -3.67 | RefSeq | COL4A2   | 1976  |
| chr1:110253236-110253958  | 723 | 21 | 7.43E-04 | -3.67 | RefSeq | CSF1     | -798  |
| chrX:100525325-100525879  | 555 | 16 | 7.51E-04 | -3.67 | RefSeq | BTK      | 1990  |
| chr1:154665923-154666426  | 504 | 14 | 7.51E-04 | -3.67 | RefSeq | C1orf61  | -114  |
| chr11:117717500-117717999 | 500 | 12 | 7.51E-04 | -3.67 | RefSeq | CD3D     | 671   |
| chr9:34600552-34601058    | 507 | 14 | 7.51E-04 | -3.67 | RefSeq | RPP25L   | 1053  |
| chr15:20443098-20443610   | 513 | 15 | 7.51E-04 | -3.67 | RefSeq | CYFIP1   | -480  |
| chrX:70349844-70350300    | 457 | 13 | 7.59E-04 | -3.67 | RefSeq | GJB1     | -1487 |
| chr14:93322513-93322853   | 341 | 10 | 7.59E-04 | -3.67 | RefSeq | PRIMA1   | 1667  |
| chr16:561640-562256       | 617 | 18 | 7.59E-04 | -3.67 | RefSeq | PIGQ     | 1671  |
| chr15:63146897-63147405   | 509 | 15 | 7.67E-04 | -3.66 | RefSeq | RASL12   | 37    |
| chr6:4947795-4948284      | 490 | 15 | 7.67E-04 | -3.66 | RefSeq | RPP40    | 1013  |
| chr10:11691403-11691889   | 487 | 14 | 7.67E-04 | -3.66 | RefSeq | USP6NL   | 1906  |
| chr6:134414122-134414608  | 487 | 14 | 7.67E-04 | -3.66 | RefSeq | SLC2A12  | 875   |
| chr12:121752621-121753118 | 498 | 14 | 7.84E-04 | -3.66 | RefSeq | HCAR2    | 740   |
| chr12:95317905-95318418   | 514 | 14 | 7.84E-04 | -3.66 | RefSeq | CDK17    | 80    |
| chr18:42796253-42796745   | 493 | 14 | 7.84E-04 | -3.65 | RefSeq | TCEB3CL  | 1625  |
| chr11:64706738-64707233   | 496 | 14 | 7.84E-04 | -3.65 | RefSeq | CAPN1    | 1476  |
| chr3:15442980-15443521    | 542 | 15 | 8.00E-04 | -3.65 | RefSeq | METTL6   | 538   |
| chr19:9407970-9408441     | 472 | 13 | 8.00E-04 | -3.65 | RefSeq | ZNF266   | -715  |
| chr1:178112486-178113001  | 516 | 16 | 8.00E-04 | -3.65 | RefSeq | TOR1AIP2 | 564   |
| chr19:38053847-38054349   | 503 | 14 | 8.00E-04 | -3.65 | RefSeq | SLC7A9   | -1323 |
| chrX:47999303-47999834    | 532 | 15 | 8.00E-04 | -3.65 | RefSeq | SSX1     | 0     |

|                           |     |    |          |       |        |              |       |
|---------------------------|-----|----|----------|-------|--------|--------------|-------|
| chr5:70916952-70917591    | 640 | 18 | 8.00E-04 | -3.65 | RefSeq | MCCC2        | -1280 |
| chr7:98763211-98763629    | 419 | 12 | 8.00E-04 | -3.65 | RefSeq | ARPC1A       | 1779  |
| chr13:98025073-98025562   | 490 | 14 | 8.00E-04 | -3.65 | RefSeq | STK24        | 1845  |
| chr2:64287156-64287642    | 487 | 14 | 8.00E-04 | -3.65 | ncRNA  | LINC00309    | -1032 |
| chr1:16175557-16176073    | 517 | 14 | 8.00E-04 | -3.64 | RefSeq | ZBTB17       | -342  |
| chr22:29051599-29052115   | 517 | 15 | 8.16E-04 | -3.64 | RefSeq | TBC1D10A     | 841   |
| chr11:133276463-133276878 | 416 | 12 | 8.24E-04 | -3.64 | ncRNA  | MIR4697HG    | 0     |
| chr14:23490761-23491255   | 495 | 15 | 8.24E-04 | -3.64 | ncRNA  | DHRS4-AS1    | 1992  |
| chr8:30132372-30132889    | 518 | 15 | 8.24E-04 | -3.64 | RefSeq | DCTN6        | -466  |
| chr22:21558584-21558928   | 345 | 10 | 8.32E-04 | -3.63 | RefSeq | IGLL5        | -1032 |
| chr16:84388779-84389190   | 412 | 12 | 8.32E-04 | -3.63 | RefSeq | EMC8         | 1460  |
| chr8:145692927-145693462  | 536 | 15 | 8.40E-04 | -3.63 | RefSeq | PPP1R16A     | 10    |
| chrX:100193722-100194255  | 534 | 15 | 8.40E-04 | -3.63 | RefSeq | TRMT2B       | 0     |
| chr20:56846479-56847059   | 581 | 17 | 8.48E-04 | -3.63 | RefSeq | GNAS         | -1131 |
| chr2:119842731-119843250  | 520 | 15 | 8.48E-04 | -3.63 | RefSeq | DBI          | 1761  |
| chr20:25938341-25938911   | 571 | 16 | 8.64E-04 | -3.63 | ncRNA  | LOC100134868 | 0     |
| chr20:61759593-61760074   | 482 | 14 | 8.64E-04 | -3.63 | RefSeq | RTEL1        | 0     |
| chr16:56787260-56787704   | 445 | 13 | 8.64E-04 | -3.63 | RefSeq | CSNK2A2      | 1580  |
| chr5:150926885-150927483  | 599 | 17 | 8.64E-04 | -3.63 | RefSeq | FAT2         | 1216  |
| chr17:45911906-45912389   | 484 | 14 | 8.64E-04 | -3.63 | RefSeq | RSAD1        | 717   |
| chr5:175989352-175989763  | 412 | 12 | 8.64E-04 | -3.62 | RefSeq | SNCB         | 401   |
| chr15:53997271-53997773   | 503 | 15 | 8.64E-04 | -3.62 | RefSeq | NEDD4        | -649  |
| chr2:61987240-61987720    | 481 | 14 | 8.64E-04 | -3.62 | RefSeq | COMMD1       | 933   |
| chr2:237988004-237988355  | 352 | 11 | 8.64E-04 | -3.62 | RefSeq | COL6A3       | -414  |
| chr6:112774430-112774916  | 487 | 12 | 8.64E-04 | -3.62 | RefSeq | RFPL4B       | -309  |
| chr18:53406004-53406588   | 585 | 13 | 8.64E-04 | -3.62 | RefSeq | FECH         | -1036 |
| chr19:12524365-12524765   | 401 | 11 | 8.64E-04 | -3.62 | RefSeq | ZNF564       | -1008 |
| chr12:63439820-63440315   | 496 | 14 | 8.72E-04 | -3.62 | RefSeq | GNS          | -326  |
| chr2:219532187-219532640  | 454 | 12 | 8.72E-04 | -3.62 | RefSeq | CDK5R2       | 0     |
| chr12:10255424-10255795   | 372 | 11 | 8.72E-04 | -3.61 | RefSeq | GABARAPL1    | -961  |
| chr18:19339323-19339787   | 465 | 14 | 8.72E-04 | -3.61 | RefSeq | C18orf8      | 1891  |
| chr5:10300791-10301337    | 547 | 16 | 8.72E-04 | -3.61 | RefSeq | FAM173B      | 1685  |
| chr19:9185732-9186291     | 560 | 16 | 8.89E-04 | -3.61 | RefSeq | OR7D4        | 257   |
| chr3:101315818-101316347  | 530 | 14 | 8.89E-04 | -3.61 | RefSeq | FILIP1L      | 0     |
| chr3:46515986-46516475    | 490 | 14 | 8.89E-04 | -3.61 | RefSeq | RTP3         | 1497  |
| chr6:43652929-43653447    | 519 | 15 | 8.97E-04 | -3.61 | RefSeq | POLH         | 1073  |
| chr12:119828002-119828538 | 537 | 16 | 8.97E-04 | -3.61 | RefSeq | SPPL3        | -1463 |
| chr16:2978430-2978944     | 515 | 15 | 8.97E-04 | -3.61 | ncRNA  | LINC00514    | -112  |
| chr13:77009775-77010226   | 452 | 13 | 8.97E-04 | -3.61 | RefSeq | SCEL         | 1965  |

|                               |      |    |          |       |        |           |       |
|-------------------------------|------|----|----------|-------|--------|-----------|-------|
| chr1:154604611-154604928      | 318  | 10 | 8.97E-04 | -3.61 | RefSeq | RHBG      | -676  |
| chr1:109433535-109433971      | 437  | 12 | 9.05E-04 | -3.6  | RefSeq | TMEM167B  | -955  |
| chr2:187265621-187266098      | 478  | 12 | 9.05E-04 | -3.6  | RefSeq | FAM171B   | -936  |
| chr4:81336193-81336828        | 636  | 17 | 9.05E-04 | -3.6  | RefSeq | PRDM8     | -853  |
| chr8:7106531-7107161          | 631  | 19 | 9.05E-04 | -3.6  | ncRNA  | LINC00965 | 1264  |
| chr21:32165826-32166326       | 501  | 14 | 9.05E-04 | -3.6  | RefSeq | HUNK      | -1173 |
| chr5:60031242-60031742        | 501  | 14 | 9.21E-04 | -3.6  | RefSeq | DEPDC1B   | 9     |
| chr16:417375-417801           | 427  | 12 | 9.21E-04 | -3.6  | RefSeq | RAB11FIP3 | 1706  |
| chr9:116124638-116125160      | 523  | 15 | 9.21E-04 | -3.6  | RefSeq | ORM1      | 0     |
| chr19:40959352-40959845       | 494  | 14 | 9.21E-04 | -3.6  | RefSeq | ARHGAP33  | 1095  |
| chr11:5226230-5226743         | 514  | 13 | 9.21E-04 | -3.59 | RefSeq | HBG1      | 921   |
| chr17:32925410-32925928       | 519  | 15 | 9.21E-04 | -3.59 | RefSeq | DUSP14    | 1346  |
| chr10:64249988-64250476       | 489  | 14 | 9.29E-04 | -3.59 | RefSeq | EGR2      | -1054 |
| chr10:118599272-118599766     | 495  | 14 | 9.29E-04 | -3.59 | RefSeq | ENO4      | 259   |
| chr5:77108394-77108781        | 388  | 11 | 9.37E-04 | -3.59 | RefSeq | TBCA      | -452  |
| chr21:45532713-45533185       | 473  | 14 | 9.37E-04 | -3.59 | RefSeq | POFUT2    | -473  |
| chr6_cox_hap1:3946684-3947200 | 517  | 12 | 9.53E-04 | -3.59 | RefSeq | HLA-DRB1  | 861   |
| chr17:4967647-4968200         | 554  | 12 | 9.53E-04 | -3.59 | RefSeq | ZNF232    | -525  |
| chr14:101091395-101091775     | 381  | 12 | 9.61E-04 | -3.59 | ncRNA  | DIO3OS    | 0     |
| chr2:108970359-108970871      | 513  | 15 | 9.61E-04 | -3.59 | RefSeq | EDAR      | 1390  |
| chr21:34474865-34475364       | 500  | 14 | 9.61E-04 | -3.58 | ncRNA  | LINC00310 | 17    |
| chr7:154492609-154493092      | 484  | 13 | 9.61E-04 | -3.58 | RefSeq | HTR5A     | 0     |
| chr16:30680078-30680570       | 493  | 15 | 9.61E-04 | -3.58 | RefSeq | C16orf93  | 497   |
| chr21:37302201-37302616       | 416  | 12 | 9.61E-04 | -3.58 | RefSeq | RIPPLY3   | 1468  |
| chr16:22734956-22735550       | 595  | 16 | 9.61E-04 | -3.58 | RefSeq | HS3ST2    | 1595  |
| chr7:5886023-5886534          | 512  | 15 | 9.61E-04 | -3.58 | RefSeq | OCM       | -421  |
| chr1:117016052-117016414      | 363  | 10 | 9.61E-04 | -3.58 | ncRNA  | MIR320B1  | 158   |
| chrX:48640438-48640940        | 503  | 14 | 9.61E-04 | -3.58 | RefSeq | PQBP1     | 299   |
| chr22:29103039-29103645       | 607  | 17 | 9.69E-04 | -3.58 | ncRNA  | KIAA1656  | 250   |
| chr9:134448368-134448940      | 573  | 17 | 9.69E-04 | -3.58 | RefSeq | BARHL1    | 554   |
| chr6:88237982-88238482        | 501  | 14 | 9.77E-04 | -3.58 | RefSeq | SLC35A1   | -880  |
| chr2:203444893-203445472      | 580  | 16 | 9.77E-04 | -3.57 | RefSeq | ICA1L     | 0     |
| chr19:60556282-60556812       | 531  | 15 | 9.86E-04 | -3.57 | RefSeq | COX6B2    | 1183  |
| chr1:32436811-32437308        | 498  | 15 | 9.86E-04 | -3.57 | RefSeq | CCDC28B   | -1266 |
| chr11:64642623-64643094       | 472  | 14 | 9.86E-04 | -3.57 | RefSeq | ZNHIT2    | -876  |
| chr6:161333876-161334374      | 499  | 15 | 9.86E-04 | -3.57 | RefSeq | MAP3K4    | 1127  |
| chr3:156278868-156279433      | 566  | 15 | 9.86E-04 | -3.57 | RefSeq | MME       | -697  |
| chr4:8973243-8974307          | 1065 | 27 | 8.08E-06 | -6.23 | RefSeq | USP17L25  | 0     |
| chr16:30165093-30165926       | 834  | 24 | 8.08E-06 | -5.38 | ncRNA  | LOC613037 | -659  |





|                           |      |    |          |       |        |              |       |
|---------------------------|------|----|----------|-------|--------|--------------|-------|
| chr4:8954158-8955180      | 1023 | 26 | 8.08E-06 | -5.29 | RefSeq | USP17L25     | 0     |
| chr4:8963612-8964816      | 1205 | 31 | 8.08E-06 | -5.17 | RefSeq | USP17L25     | 0     |
| chr4:8958574-8960106      | 1533 | 40 | 8.08E-06 | -5.13 | RefSeq | USP17L25     | 0     |
| chr7:72139293-72139801    | 509  | 15 | 4.85E-05 | -4.65 | ncRNA  | SPDYE8P      | -1047 |
| chr16:28671193-28671704   | 512  | 14 | 5.65E-05 | -4.61 | RefSeq | NPIP89       | 0     |
| chr9:108666353-108666925  | 573  | 15 | 1.13E-04 | -4.38 | RefSeq | ZNF462       | 1154  |
| chr10:75175946-75176434   | 489  | 14 | 1.53E-04 | -4.3  | RefSeq | SEC24C       | 1809  |
| chr8:12033509-12034183    | 675  | 18 | 1.78E-04 | -4.26 | RefSeq | USP17L2      | 0     |
| chr10:126841065-126841650 | 586  | 16 | 1.86E-04 | -4.26 | RefSeq | CTBP2        | -1450 |
| chr15:20267123-20267655   | 533  | 13 | 1.86E-04 | -4.22 | ncRNA  | GOLGA8DP     | -30   |
| chr7:74962166-74962836    | 671  | 19 | 2.02E-04 | -4.18 | RefSeq | SPDYE5       | 0     |
| chr3:171167671-171168273  | 603  | 17 | 2.10E-04 | -4.14 | RefSeq | SEC62        | 397   |
| chr9:68942605-68943141    | 537  | 16 | 2.10E-04 | -4.13 | ncRNA  | LOC100133920 | 1424  |
| chr2:71073806-71074319    | 514  | 15 | 2.26E-04 | -4.11 | RefSeq | TEX261       | 1191  |
| chr9:166768-167286        | 519  | 15 | 2.26E-04 | -4.1  | RefSeq | CBWD1        | 1790  |
| chr8:7872786-7874109      | 1324 | 36 | 2.26E-04 | -4.09 | RefSeq | USP17L3      | 0     |
| chr9:93163967-93164707    | 741  | 18 | 2.26E-04 | -4.09 | RefSeq | AUH          | 0     |
| chr17:562541-563046       | 506  | 13 | 3.07E-04 | -4    | RefSeq | VPS53        | 1801  |
| chrX:119904878-119905376  | 499  | 14 | 4.93E-04 | -3.83 | RefSeq | CT47A10      | -1323 |
| chr18:46605822-46606334   | 513  | 10 | 5.25E-04 | -3.82 | RefSeq | MRO          | -69   |
| chr17:41946669-41947193   | 525  | 15 | 5.33E-04 | -3.81 | RefSeq | LRRC37A2     | 1277  |
| chr7:72136793-72137326    | 534  | 15 | 5.41E-04 | -3.8  | ncRNA  | SPDYE8P      | 920   |
| chr8:11180509-11180832    | 324  | 10 | 5.65E-04 | -3.77 | RefSeq | MTMR9        | 1099  |
| chrX:119947755-119948237  | 483  | 14 | 5.98E-04 | -3.75 | RefSeq | CT47A10      | -435  |
| chr3:197121675-197122168  | 494  | 15 | 6.38E-04 | -3.72 | RefSeq | TNK2         | -1397 |
| chr4:109762844-109763360  | 517  | 14 | 7.03E-04 | -3.69 | RefSeq | RPL34        | 1673  |
| chr17:20167004-20167484   | 481  | 14 | 7.67E-04 | -3.66 | ncRNA  | CCDC144CP    | 1925  |
| chr19:4469649-4470185     | 537  | 15 | 7.84E-04 | -3.66 | RefSeq | PLIN4        | -932  |
| chr3:46715927-46716445    | 519  | 11 | 7.84E-04 | -3.65 | RefSeq | TMIE         | -1382 |
| chr3:159310440-159310981  | 542  | 15 | 8.24E-04 | -3.64 | RefSeq | RSRC1        | 0     |
| chr4:8968028-8968670      | 643  | 18 | 8.72E-04 | -3.61 | RefSeq | USP17L10     | -537  |
| chr5:151044917-151045455  | 539  | 11 | 8.89E-04 | -3.61 | RefSeq | SPARC        | 1354  |
| chr14:76914230-76914742   | 513  | 15 | 9.61E-04 | -3.59 | RefSeq | SAMD15       | 715   |
| chrX:49065674-49066173    | 500  | 14 | 9.61E-04 | -3.58 | RefSeq | GAGE12J      | 221   |
| chr3:125294404-125294909  | 506  | 14 | 9.61E-04 | -3.58 | RefSeq | KALRN        | -1339 |
| chr12:130005749-130006259 | 511  | 15 | 9.69E-04 | -3.58 | RefSeq | GPR133       | 1344  |
| chr17:24013178-24013749   | 572  | 17 | 9.86E-04 | -3.57 | RefSeq | SUPT6H       | 0     |
| chr21:44956800-44957318   | 519  | 12 | 9.86E-04 | -3.57 | RefSeq | TSPEAR       | -876  |
| chr3:180272616-180273081  | 466  | 14 | 9.86E-04 | -3.57 | RefSeq | ZMAT3        | -265  |

Online supplements are not copyedited prior to posting and the author(s) take full responsibility for the accuracy of all data.

**e-Table 5:** Canonical pathways overrepresented in DMRS between PRE and POST groups.

| <b>DMRs with higher DNA methylation in PRE group</b>                         |                      |              |
|------------------------------------------------------------------------------|----------------------|--------------|
| <b>Pathway</b>                                                               | <b>-log(p-value)</b> | <b>Ratio</b> |
| RAR Activation                                                               | 1.81E+00             | 4.21E-02     |
| Biogenesis of Mitochondria                                                   | 1.36E+00             | 1.00E-01     |
| Xenobiotic Metabolism Signaling                                              | 1.23E+00             | 2.98E-02     |
| Increases Glomerular Injury                                                  | 1.22E+00             | 5.66E-02     |
| Increases Renal Proliferation                                                | 1.10E+00             | 3.68E-02     |
| Hepatic Fibrosis                                                             | 1.07E+00             | 4.04E-02     |
| Negative Acute Phase Response Proteins                                       | 8.97E-01             | 1.25E-01     |
| Fatty Acid Metabolism                                                        | 8.70E-01             | 3.42E-02     |
| Renal Ischemic Resistance Panel (Rat)                                        | 8.07E-01             | 1.00E-01     |
| Glutathione Depletion - CYP Induction and Reactive Metabolites               | 7.35E-01             | 8.33E-02     |
| PPAR $\alpha$ /RXR $\alpha$ Activation                                       | 7.08E-01             | 2.73E-02     |
| LPS/IL-1 Mediated Inhibition of RXR Function                                 | 6.05E-01             | 2.39E-02     |
| Cytochrome P450 Panel - Substrate is a Xenobiotic (Human)                    | 5.80E-01             | 5.56E-02     |
| Aryl Hydrocarbon Receptor Signaling                                          | 5.42E-01             | 2.48E-02     |
| Glutathione Depletion - Phase II Reactions                                   | 5.41E-01             | 5.00E-02     |
| PXR/RXR Activation                                                           | 5.07E-01             | 2.99E-02     |
| Nongenotoxic Hepatocarcinogenicity Biomarker Panel                           | 5.06E-01             | 4.55E-02     |
| Mitochondrial Dysfunction                                                    | 4.64E-01             | 2.27E-02     |
| Cytochrome P450 Panel - Substrate is a Xenobiotic (Mouse)                    | 4.61E-01             | 4.00E-02     |
| Cytochrome P450 Panel - Substrate is a Xenobiotic (Rat)                      | 4.48E-01             | 3.85E-02     |
| Renal Proximal Tubule Toxicity Biomarker Panel (Rat)                         | 4.35E-01             | 3.70E-02     |
| Reversible Glomerulonephritis Biomarker Panel (Rat)                          | 4.35E-01             | 3.70E-02     |
| Increases Cardiac Dilation                                                   | 4.22E-01             | 3.57E-02     |
| CAR/RXR Activation                                                           | 4.10E-01             | 3.45E-02     |
| Increases Liver Steatosis                                                    | 4.02E-01             | 2.47E-02     |
| TGF- $\beta$ Signaling                                                       | 3.48E-01             | 2.22E-02     |
| Mechanism of Gene Regulation by Peroxisome Proliferators via PPAR $\alpha$   | 3.22E-01             | 2.11E-02     |
| Hepatic Cholestasis                                                          | 2.78E-01             | 1.82E-02     |
| Increases Liver Damage                                                       | 2.72E-01             | 1.89E-02     |
| NRF2-mediated Oxidative Stress Response                                      | 2.55E-01             | 1.71E-02     |
| Increases Renal Nephritis                                                    | 2.48E-01             | 2.04E-02     |
| Increases Liver Hepatitis                                                    | 2.32E-01             | 1.92E-02     |
| Decreases Transmembrane Potential of Mitochondria and Mitochondrial Membrane | 2.30E-01             | 1.71E-02     |
| <b>DMRs with higher DNA methylation in POST group</b>                        |                      |              |
| <b>Pathway</b>                                                               | <b>-log(p-value)</b> | <b>Ratio</b> |
| Renal Necrosis/Cell Death                                                    | 2.22E+00             | 3.63E-02     |
| Cell Cycle: G1/S Checkpoint Regulation                                       | 2.10E+00             | 7.58E-02     |
| Cardiac Fibrosis                                                             | 2.00E+00             | 4.71E-02     |

Online supplements are not copyedited prior to posting and the author(s) take full responsibility for the accuracy of all data.

|                                                                                                              |          |          |
|--------------------------------------------------------------------------------------------------------------|----------|----------|
| Increases Liver Hyperplasia/Hyperproliferation                                                               | 1.95E+00 | 6.00E-02 |
| VDR/RXR Activation                                                                                           | 1.81E+00 | 6.41E-02 |
| Cell Cycle: G2/M DNA Damage Checkpoint Regulation                                                            | 1.79E+00 | 7.69E-02 |
| Mechanism of Gene Regulation by Peroxisome Proliferators via PPAR $\alpha$                                   | 1.48E+00 | 5.26E-02 |
| Increases Cardiac Proliferation                                                                              | 1.24E+00 | 6.38E-02 |
| Cardiac Necrosis/Cell Death                                                                                  | 1.18E+00 | 3.36E-02 |
| Increases Liver Hepatitis                                                                                    | 1.13E+00 | 5.77E-02 |
| Increases Heart Failure                                                                                      | 1.13E+00 | 8.33E-02 |
| Aryl Hydrocarbon Receptor Signaling                                                                          | 1.08E+00 | 3.73E-02 |
| Increases Cardiac Dilation                                                                                   | 1.02E+00 | 7.14E-02 |
| Renal Safety Biomarker Panel (PSTC)                                                                          | 9.70E-01 | 1.67E-01 |
| Cytochrome P450 Panel - Substrate is an Eicosanoid (Human)                                                   | 9.07E-01 | 1.43E-01 |
| Liver Proliferation                                                                                          | 8.69E-01 | 3.08E-02 |
| Vasopressin-induced Genes in Inner Medullary Renal Collecting Duct Cells (Rat)                               | 8.53E-01 | 1.25E-01 |
| Cytochrome P450 Panel - Substrate is a Fatty Acid (Human)                                                    | 7.64E-01 | 1.00E-01 |
| Genes Upregulated in Response to Proteinuria-induced Oxidative Stress in Renal Proximal Tubule Cells (Human) | 7.64E-01 | 1.00E-01 |
| Cytochrome P450 Panel - Substrate is a Fatty Acid (Rat)                                                      | 7.26E-01 | 9.09E-02 |
| Glutathione Depletion - CYP Induction and Reactive Metabolites                                               | 6.93E-01 | 8.33E-02 |
| Increases Bradycardia                                                                                        | 6.07E-01 | 6.67E-02 |
| Cytochrome P450 Panel - Substrate is a Fatty Acid (Mouse)                                                    | 5.83E-01 | 6.25E-02 |
| Hepatic Fibrosis                                                                                             | 5.48E-01 | 3.03E-02 |
| Increases Depolarization of Mitochondria and Mitochondrial Membrane                                          | 5.40E-01 | 5.56E-02 |
| Oxidative Stress                                                                                             | 5.39E-01 | 3.51E-02 |
| Glutathione Depletion - Phase II Reactions                                                                   | 5.02E-01 | 5.00E-02 |
| Increases Liver Damage                                                                                       | 4.96E-01 | 2.83E-02 |
| Acute Renal Failure Panel (Rat)                                                                              | 4.90E-01 | 3.23E-02 |
| Decreases Depolarization of Mitochondria and Mitochondrial Membrane                                          | 4.38E-01 | 4.17E-02 |
| Hepatic Cholestasis                                                                                          | 4.28E-01 | 2.42E-02 |
| Renal Proximal Tubule Toxicity Biomarker Panel (Rat)                                                         | 3.98E-01 | 3.70E-02 |
| Increases Renal Damage                                                                                       | 3.47E-01 | 2.47E-02 |
| Increases Renal Proliferation                                                                                | 3.28E-01 | 2.21E-02 |
| Hepatic Stellate Cell Activation                                                                             | 3.15E-01 | 2.86E-02 |
| TGF- $\beta$ Signaling                                                                                       | 2.97E-01 | 2.22E-02 |
| Pro-Apoptosis                                                                                                | 2.61E-01 | 2.38E-02 |
| p53 Signaling                                                                                                | 2.55E-01 | 2.02E-02 |
| Increases Renal Nephritis                                                                                    | 2.19E-01 | 2.04E-02 |
